# Supplementary material for: Synthesis and application of methyl itaconate–anthracene adducts in configuration assignment of chiral secondary alcohols by 1H NMR
Source: Royal Society of Chemistry journal article supplement (doi:10.1039/d1ob01387d), 2021-01-01
Supplement: d1ob01387d1.pdf [file d1ob01387d1.pdf]

# Synthesis and Application of Methyl itaconate-Anthracene Adducts in Configuration Assignment of Chiral Secondary Alcohols by $^1\text{H}$ NMR

Puracheth Rithchumpon,<sup>a,c</sup> Neeranuth Intakaew,<sup>a,b,c</sup> Nopawit Khamto,<sup>a,c</sup>  
Saranphong Yimklan,<sup>a</sup> Piyarat Nimmanpipug,<sup>a</sup> Praput Thavornyutikarn,<sup>a</sup> and  
Puttinan Meepowpan<sup>a,b,d,\*</sup>

a. Department of Chemistry, Faculty of Science, Chiang Mai University, 239 Huay Kaew Road, Chiang Mai, 50200, Thailand.

b. Center of Excellence for Innovation in Chemistry (PERCH-CIC), Faculty of Science, Chiang Mai University, 239 Huay Kaew Road, Chiang Mai 50200, Thailand.

c. Graduate School, Chiang Mai University, 239 Huay Kaew Road, Chiang Mai 50200, Thailand

d. Material Science Research Center (MsRC), Faculty of Science, Chiang Mai University, 239 Huay Kaew Road, Chiang Mai 50200, Thailand.

\*E-Mail: pmeepowpan@gmail.com

## Table of Contents

|                                                           |     |
|-----------------------------------------------------------|-----|
| I. $^1\text{H}$ , $^{13}\text{C}$ and 2D-NMR Spectra..... | S2  |
| II. Density Functional Theory Calculations.....           | S56 |
| III. Crystallographic Data .....                          | S64 |

# I. $^1\text{H}$ , $^{13}\text{C}$ and 2D-NMR Spectra of MIA and Their Derivatives

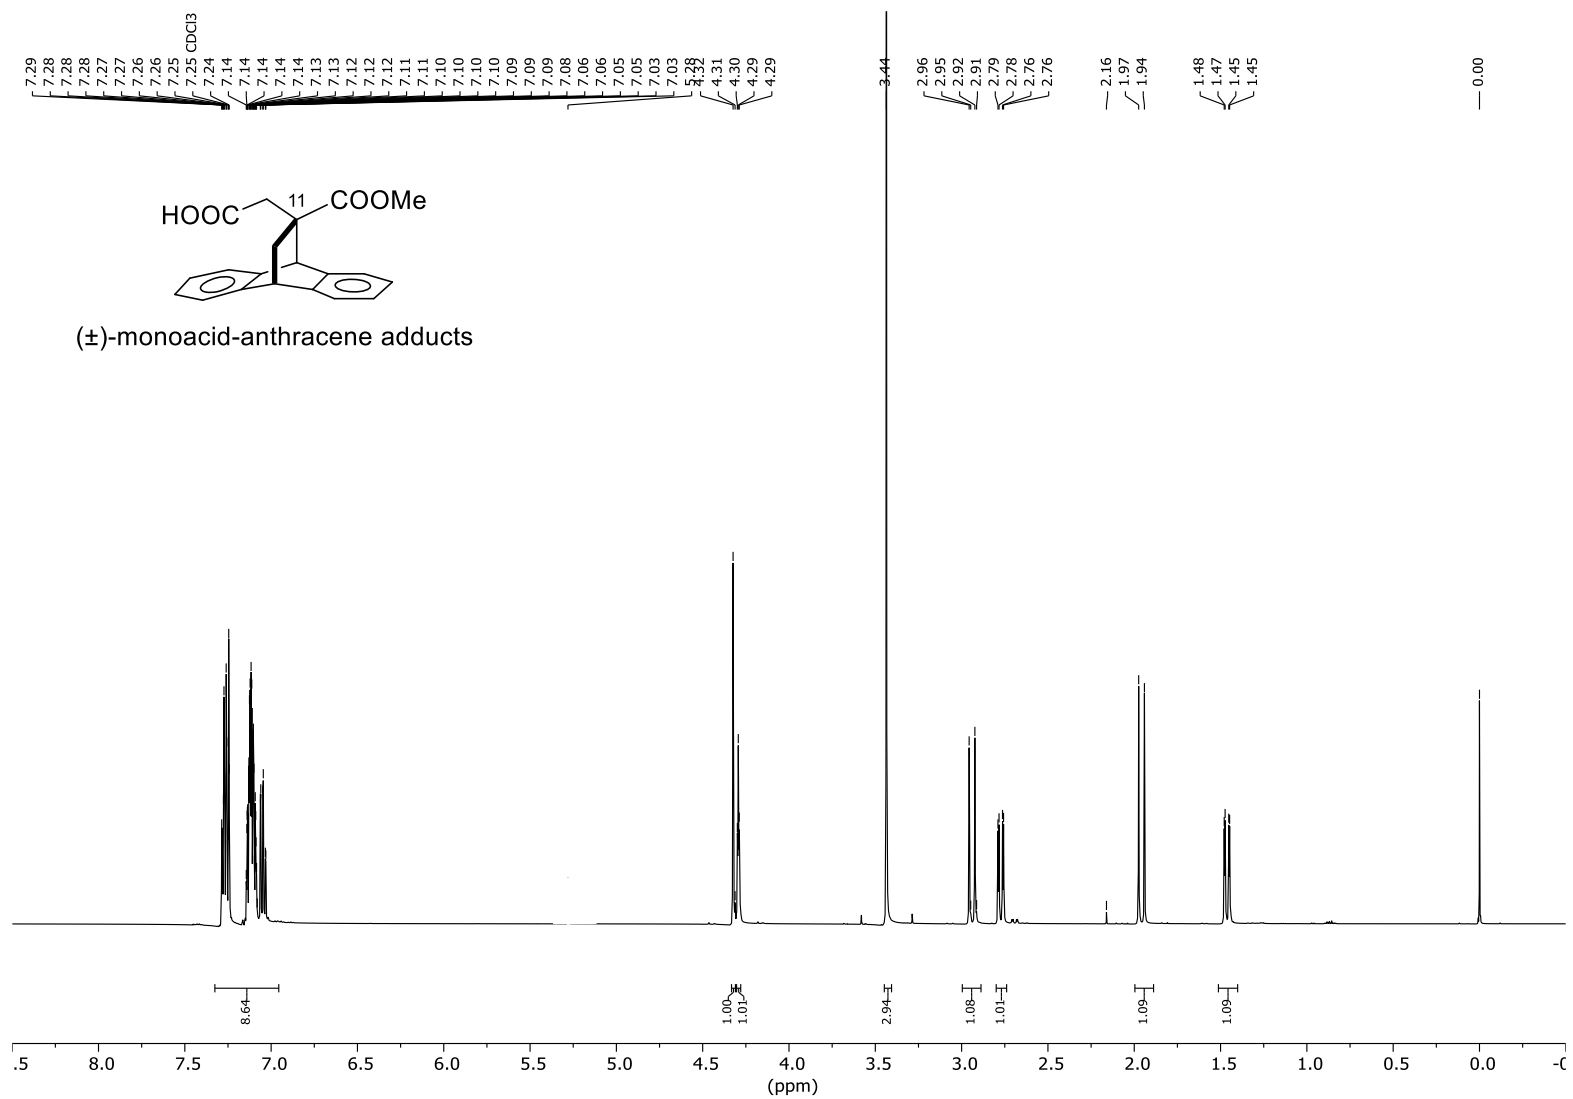

Figure S1  $^1\text{H}$  NMR (500 MHz,  $\text{CDCl}_3$ ) spectrum of  $(\pm)$ -monoacid-anthracene adducts

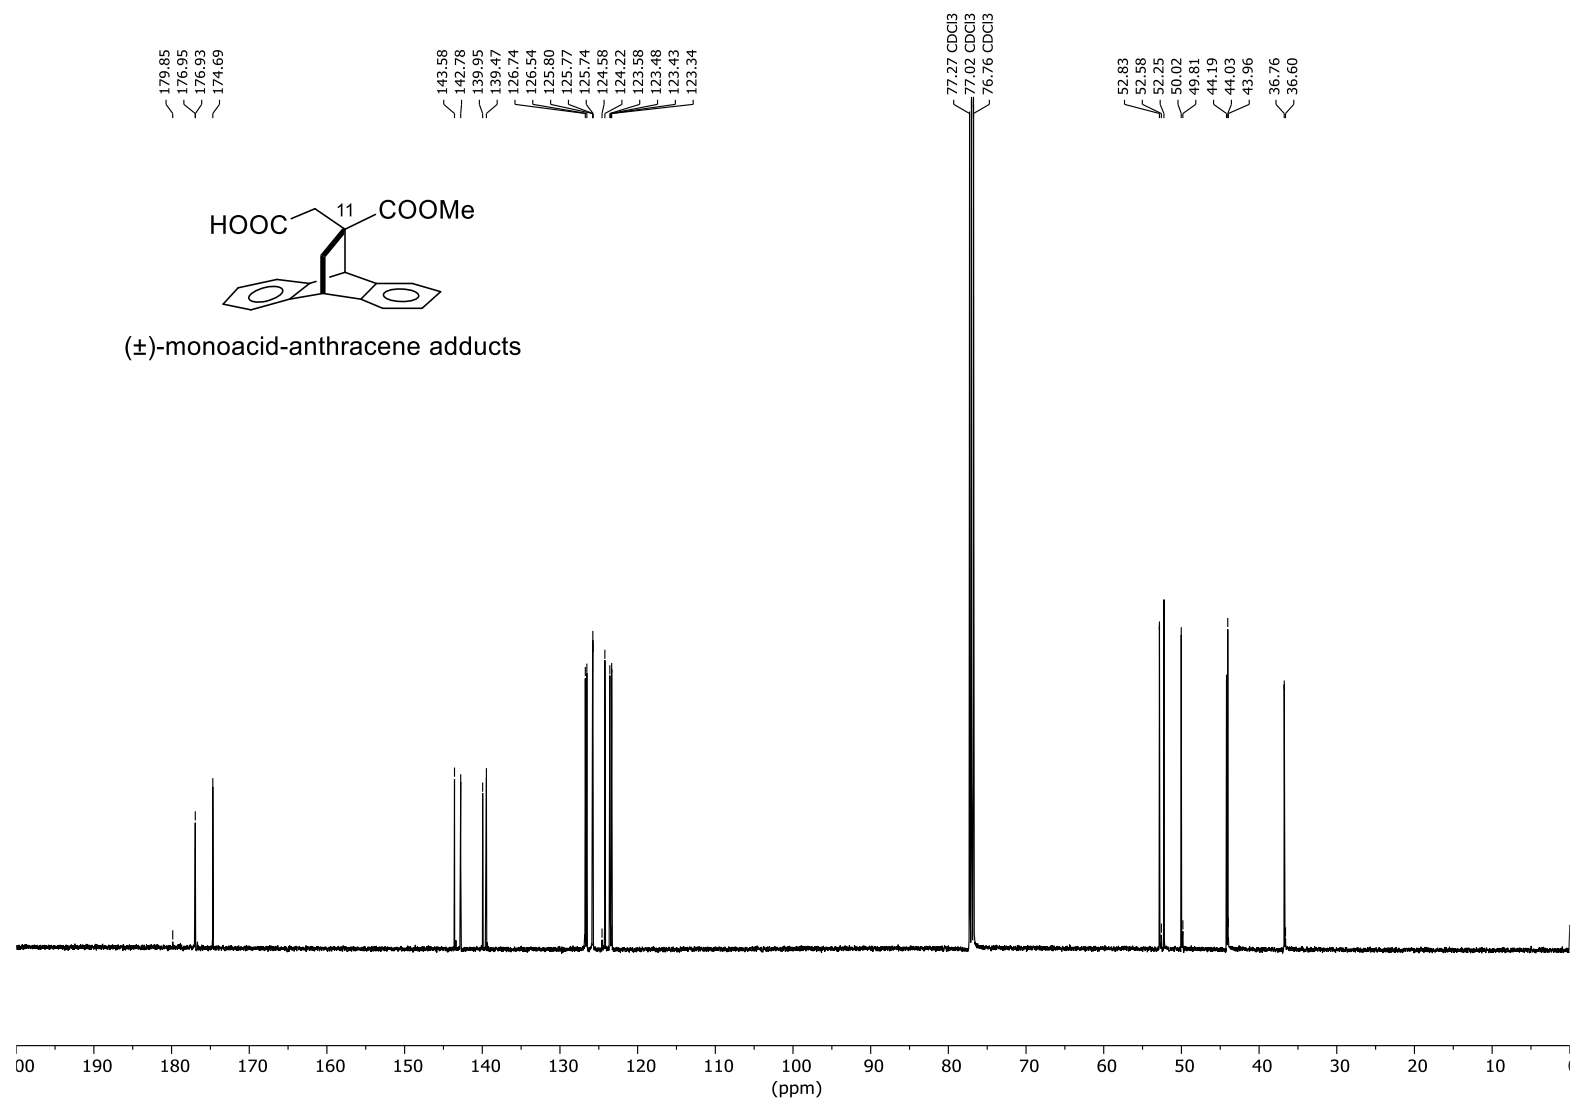

**Figure S2**  $^{13}\text{C}$  NMR (126 MHz,  $\text{CDCl}_3$ ) spectrum of ( $\pm$ )-monoacid-anthracene adducts

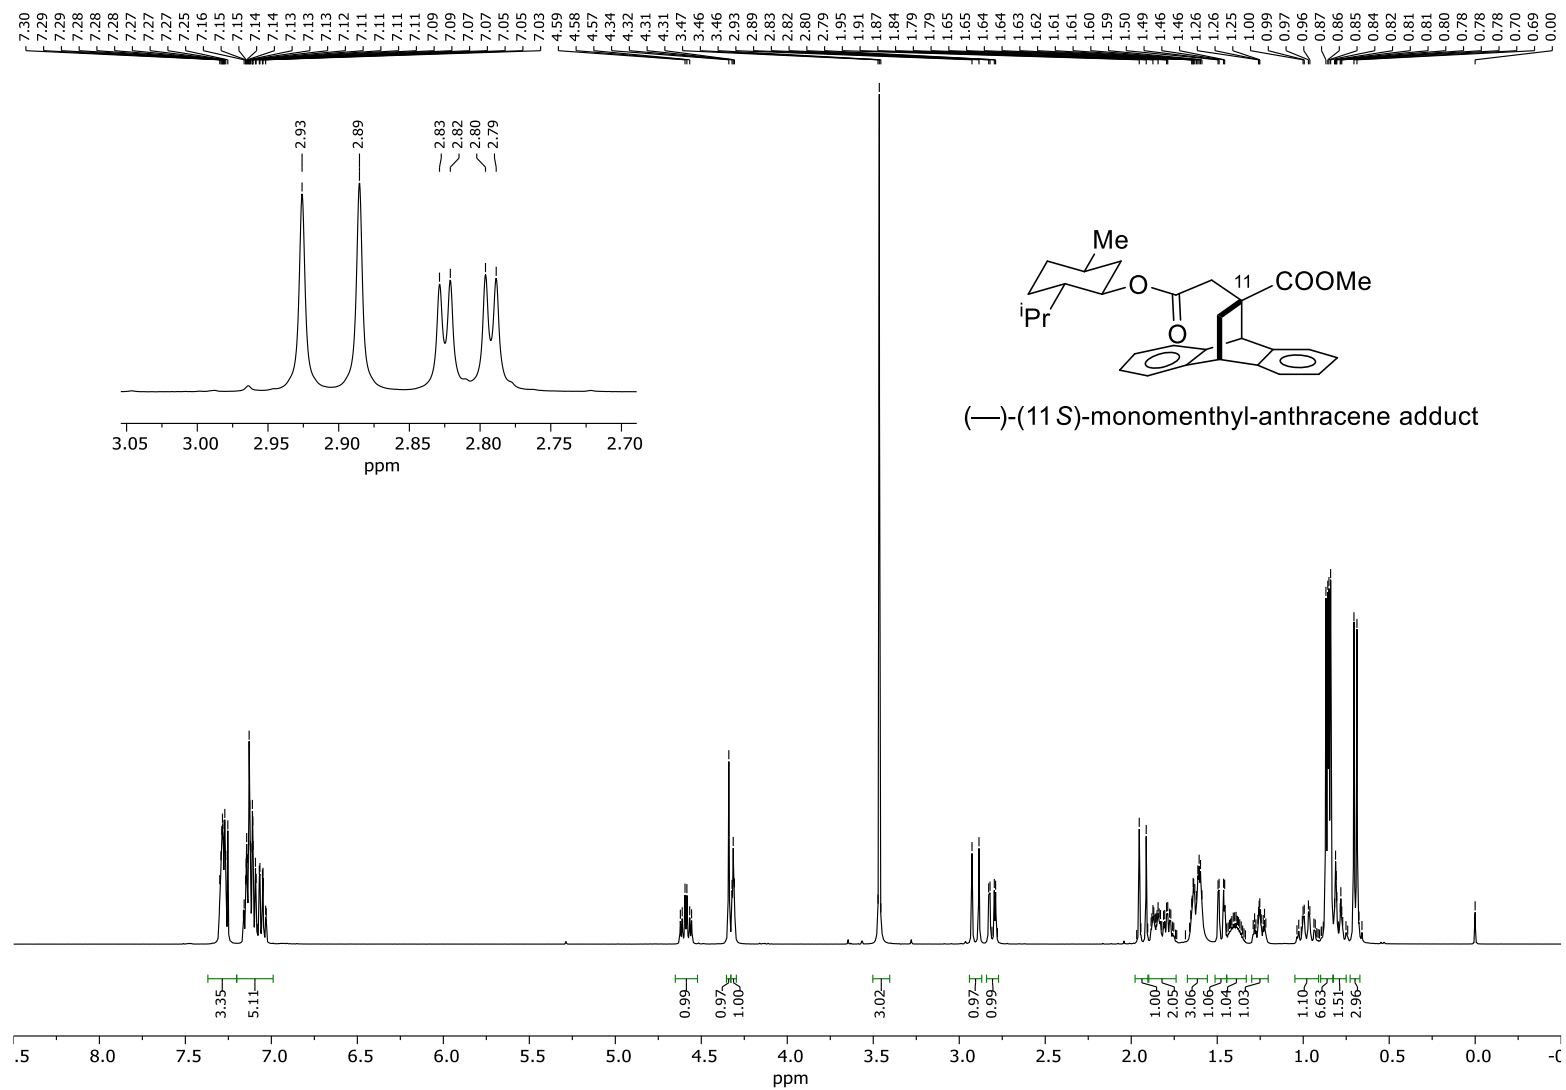

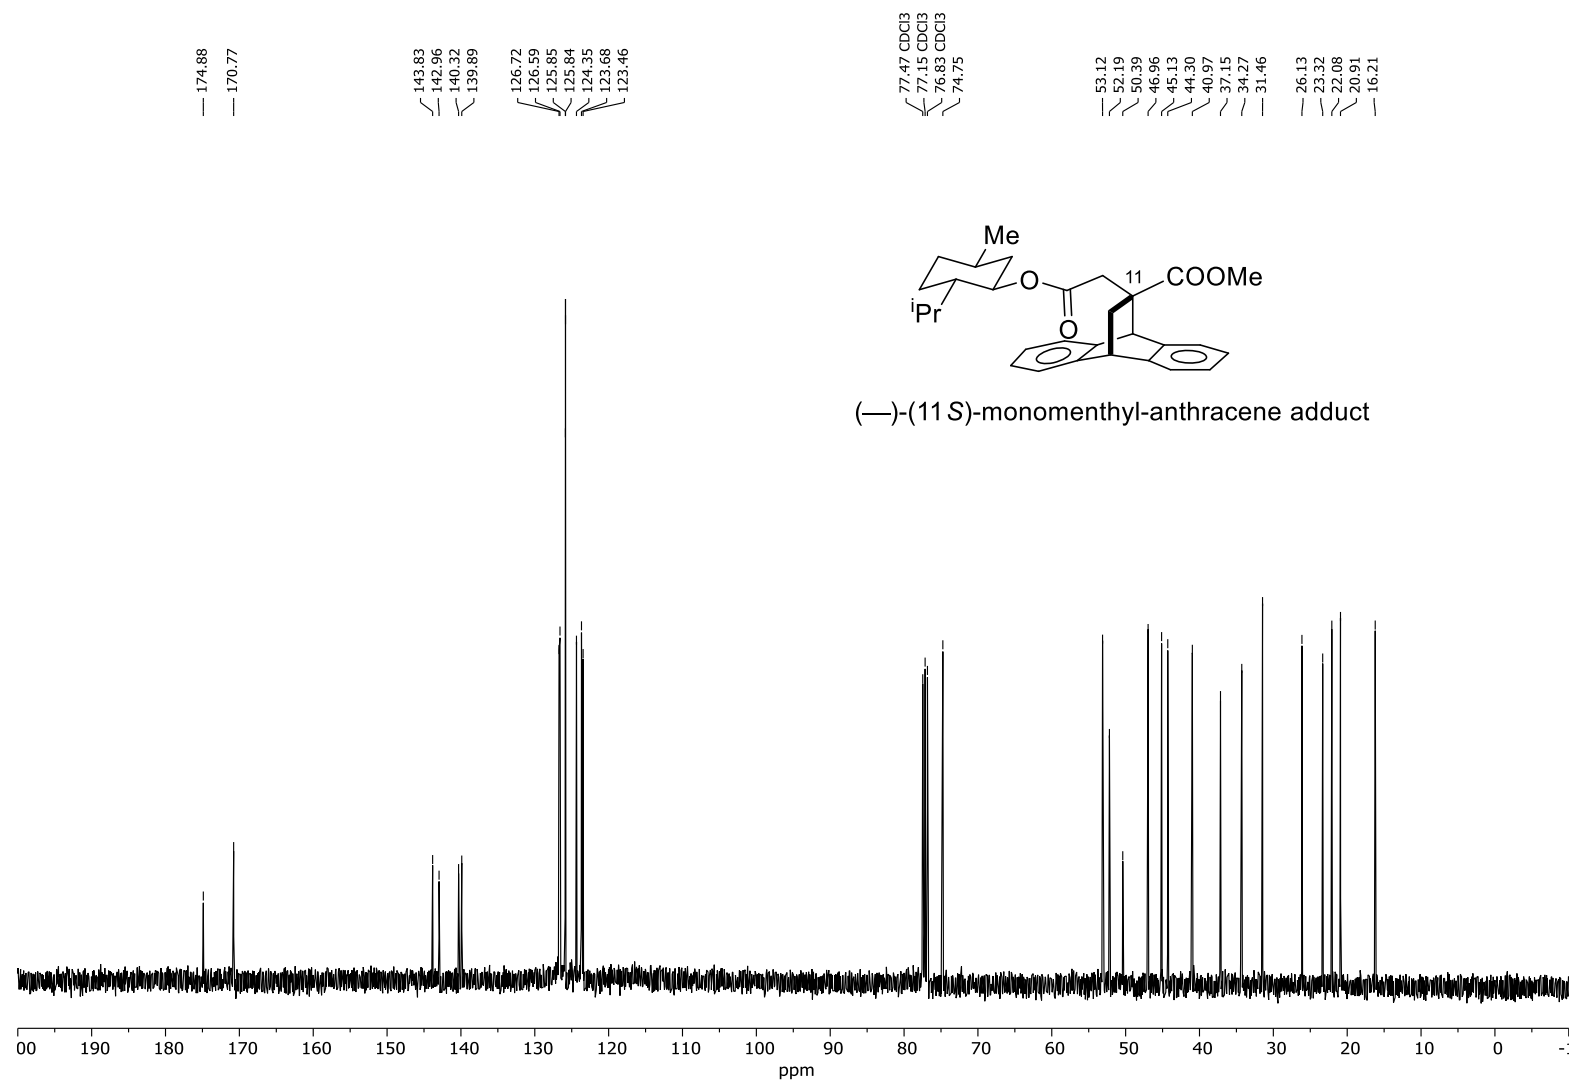

Figure S4 <sup>13</sup>C NMR (100 MHz, CDCl<sub>3</sub>) spectrum of (-)-(11S)-monomenthyl-anthracene adduct

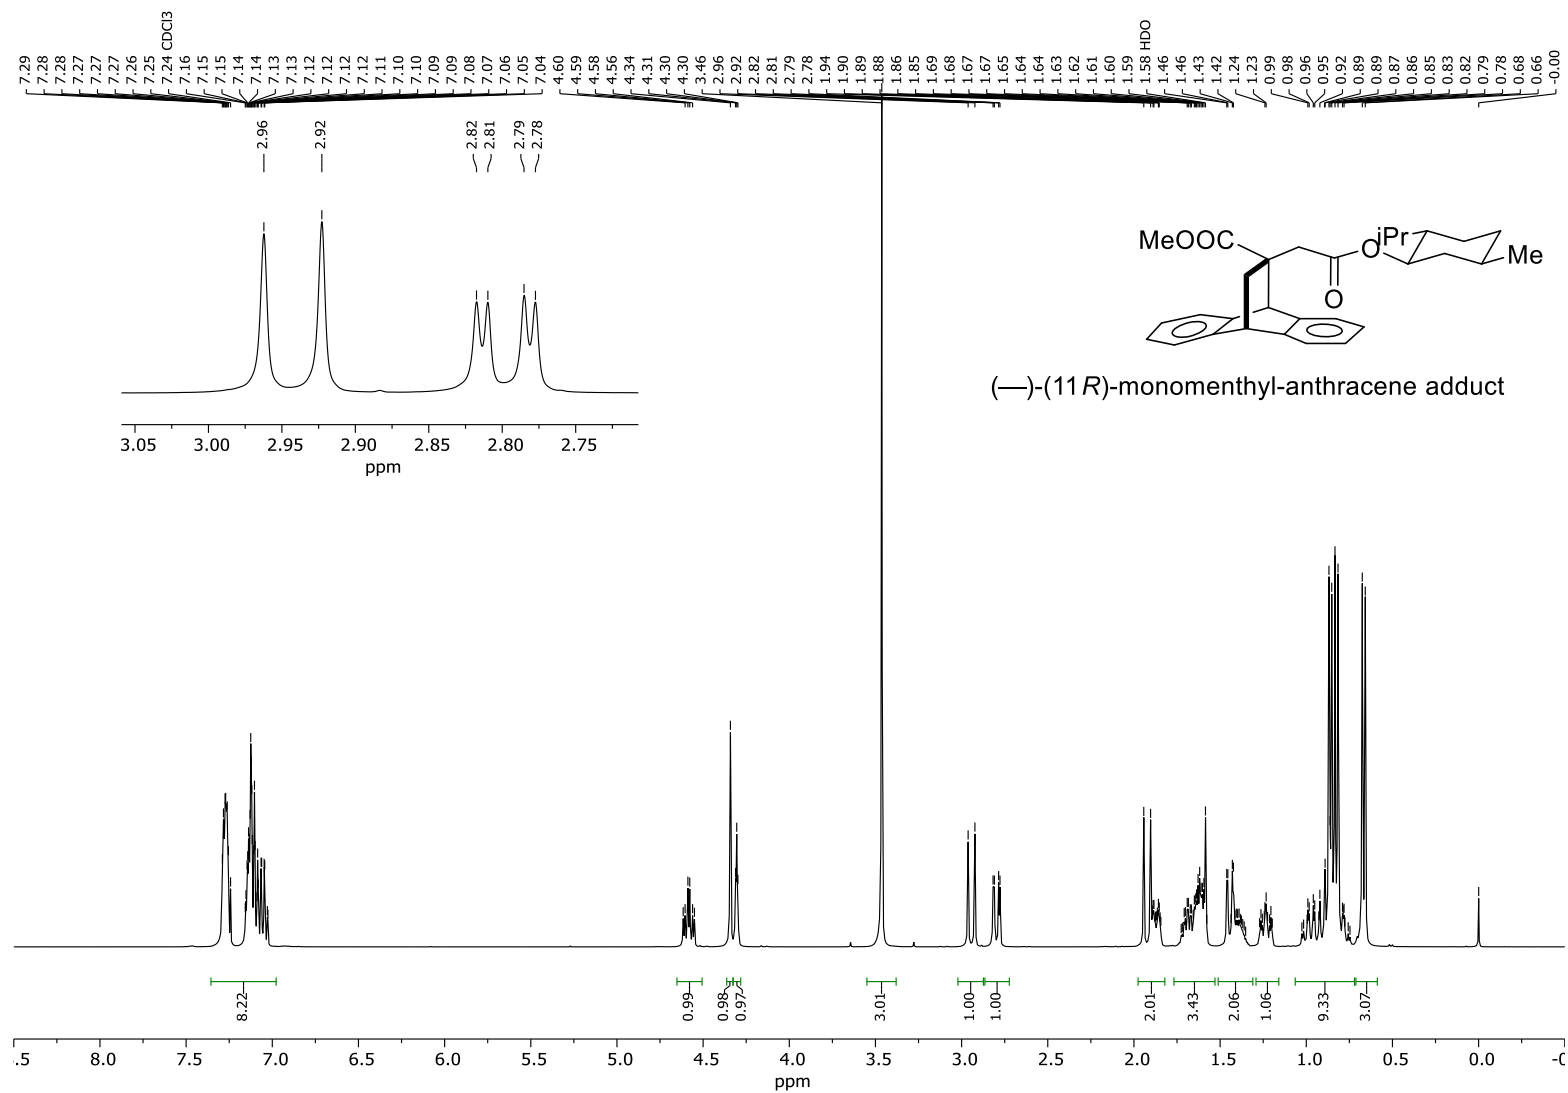

Figure S5  $^1\text{H NMR}$  (400 MHz,  $\text{CDCl}_3$ ) spectrum of (-)-(11*R*)-monomenthyl-anthracene adduct

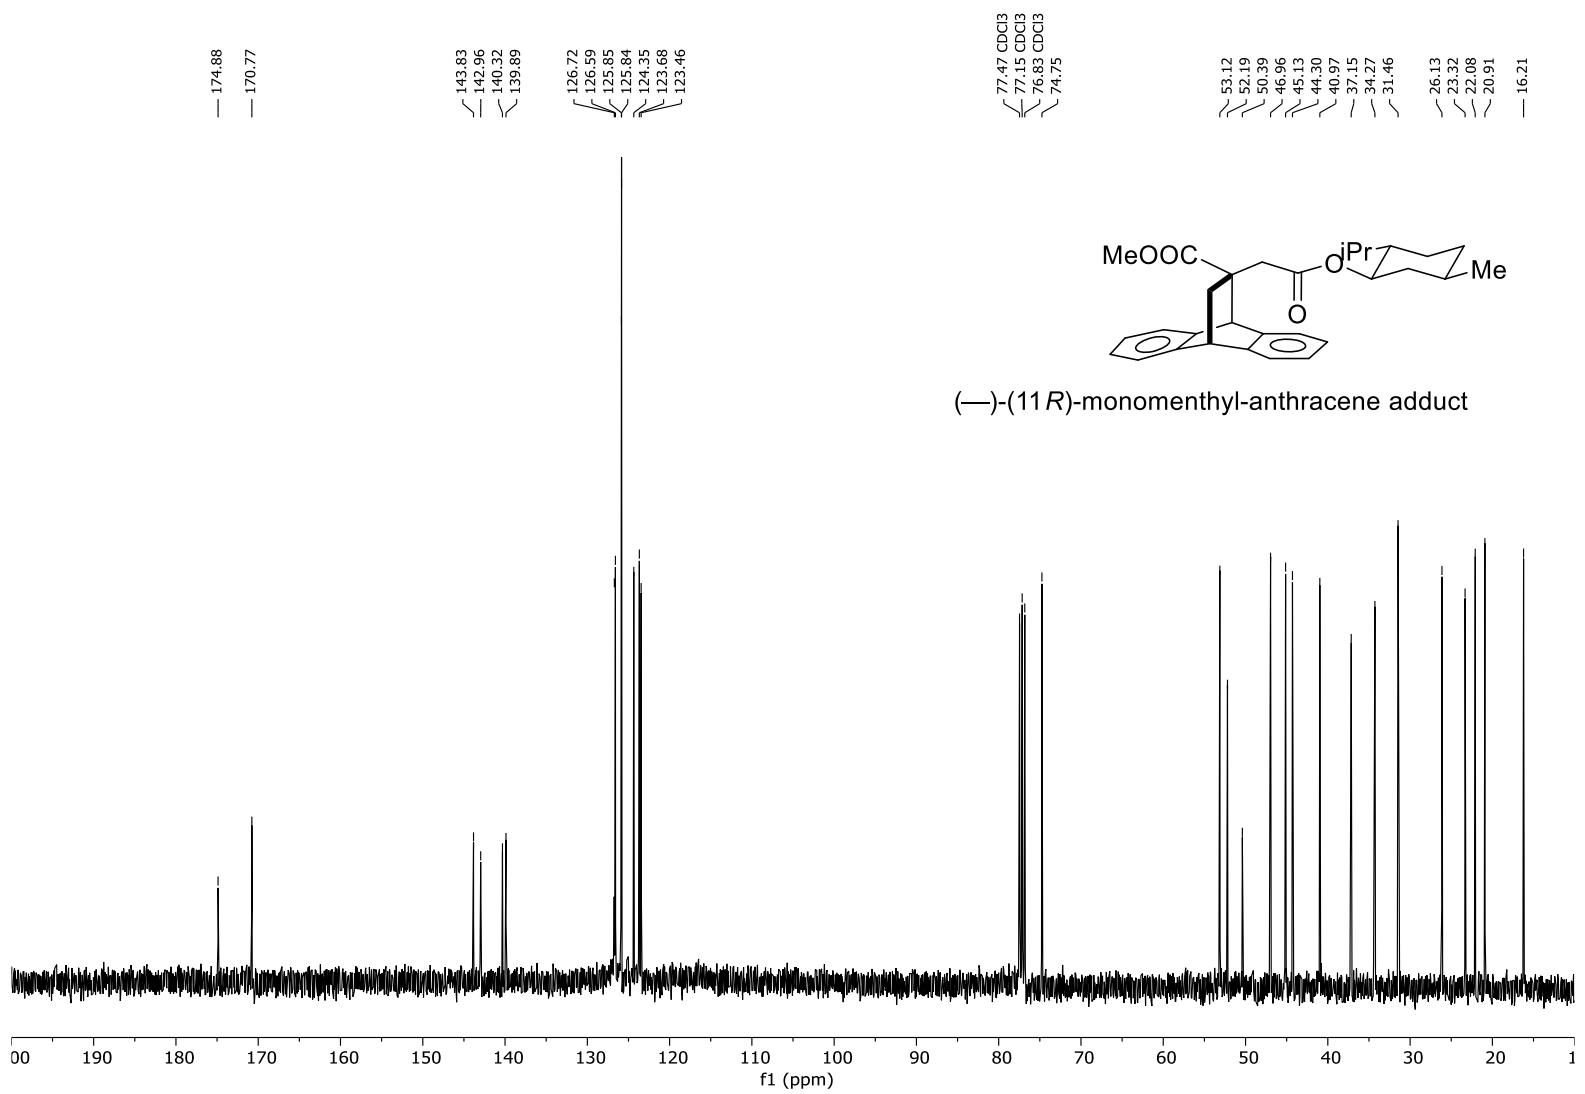

Figure S6  $^{13}\text{C}$  NMR (100 MHz,  $\text{CDCl}_3$ ) spectrum of (-)-(11R)-monomenthyl-anthracene adduct

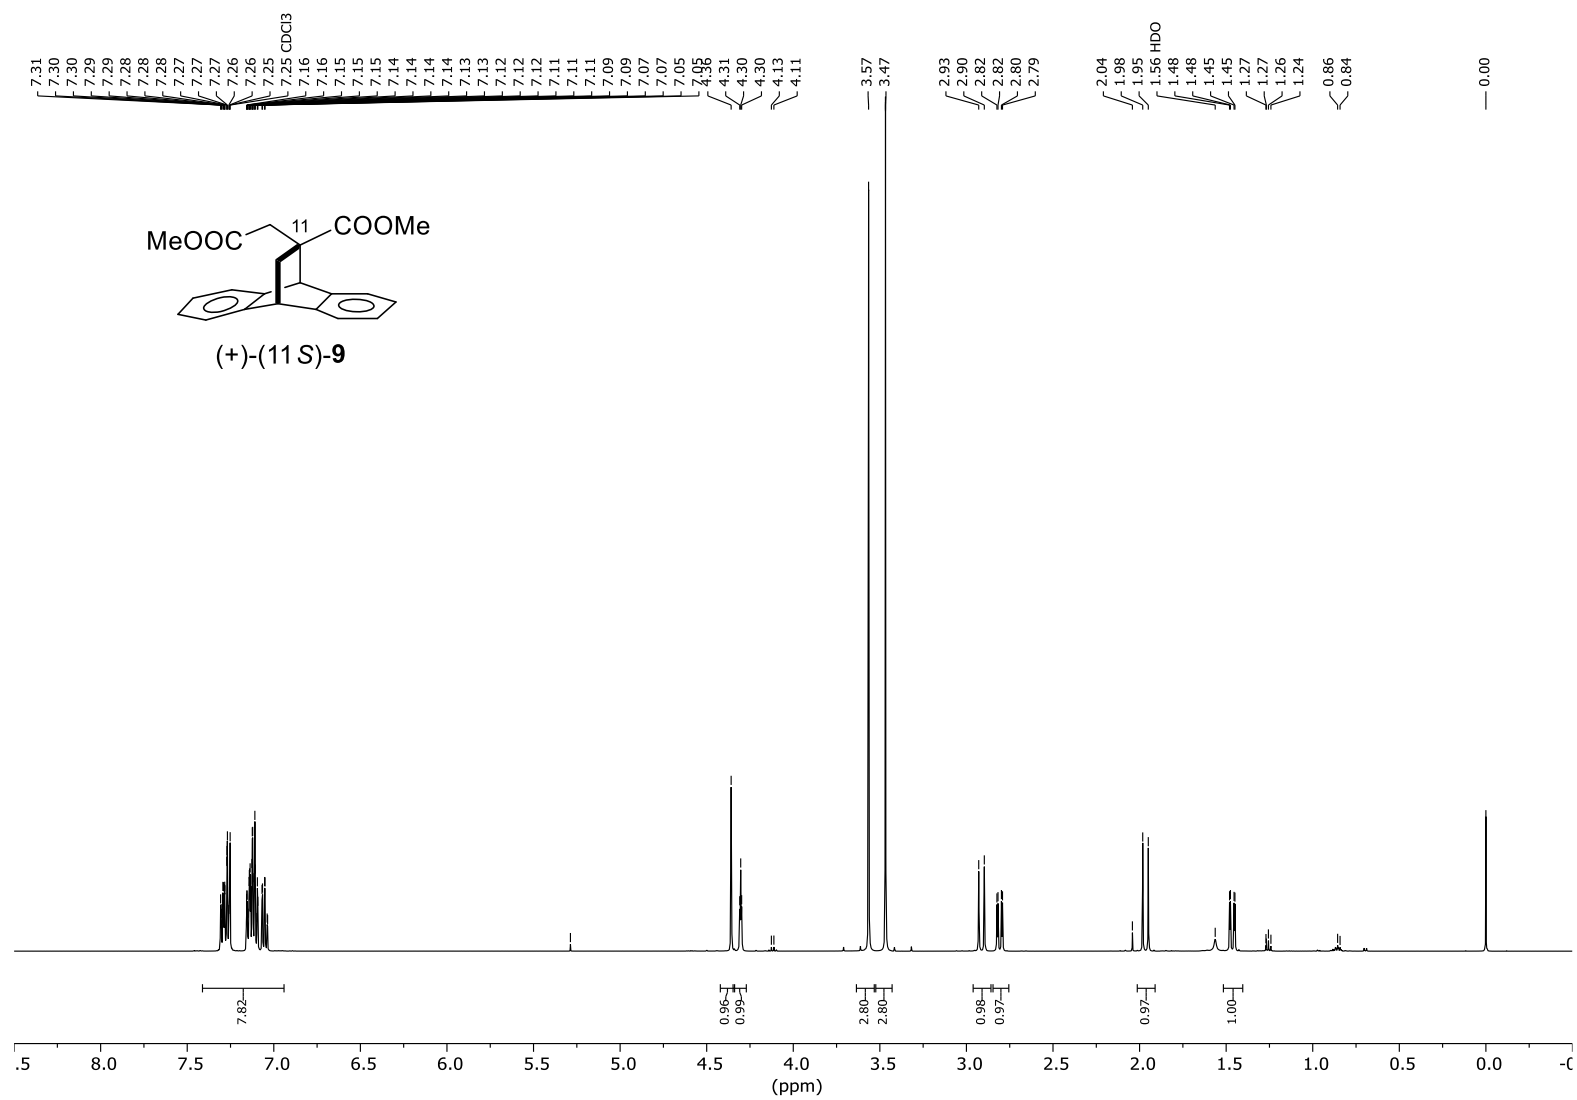

Figure S7 <sup>1</sup>H NMR (500 MHz, CDCl<sub>3</sub>) spectrum of (+)-(11S)-dimethyl itaconate-anthracene adduct, (+)-(11S)-9



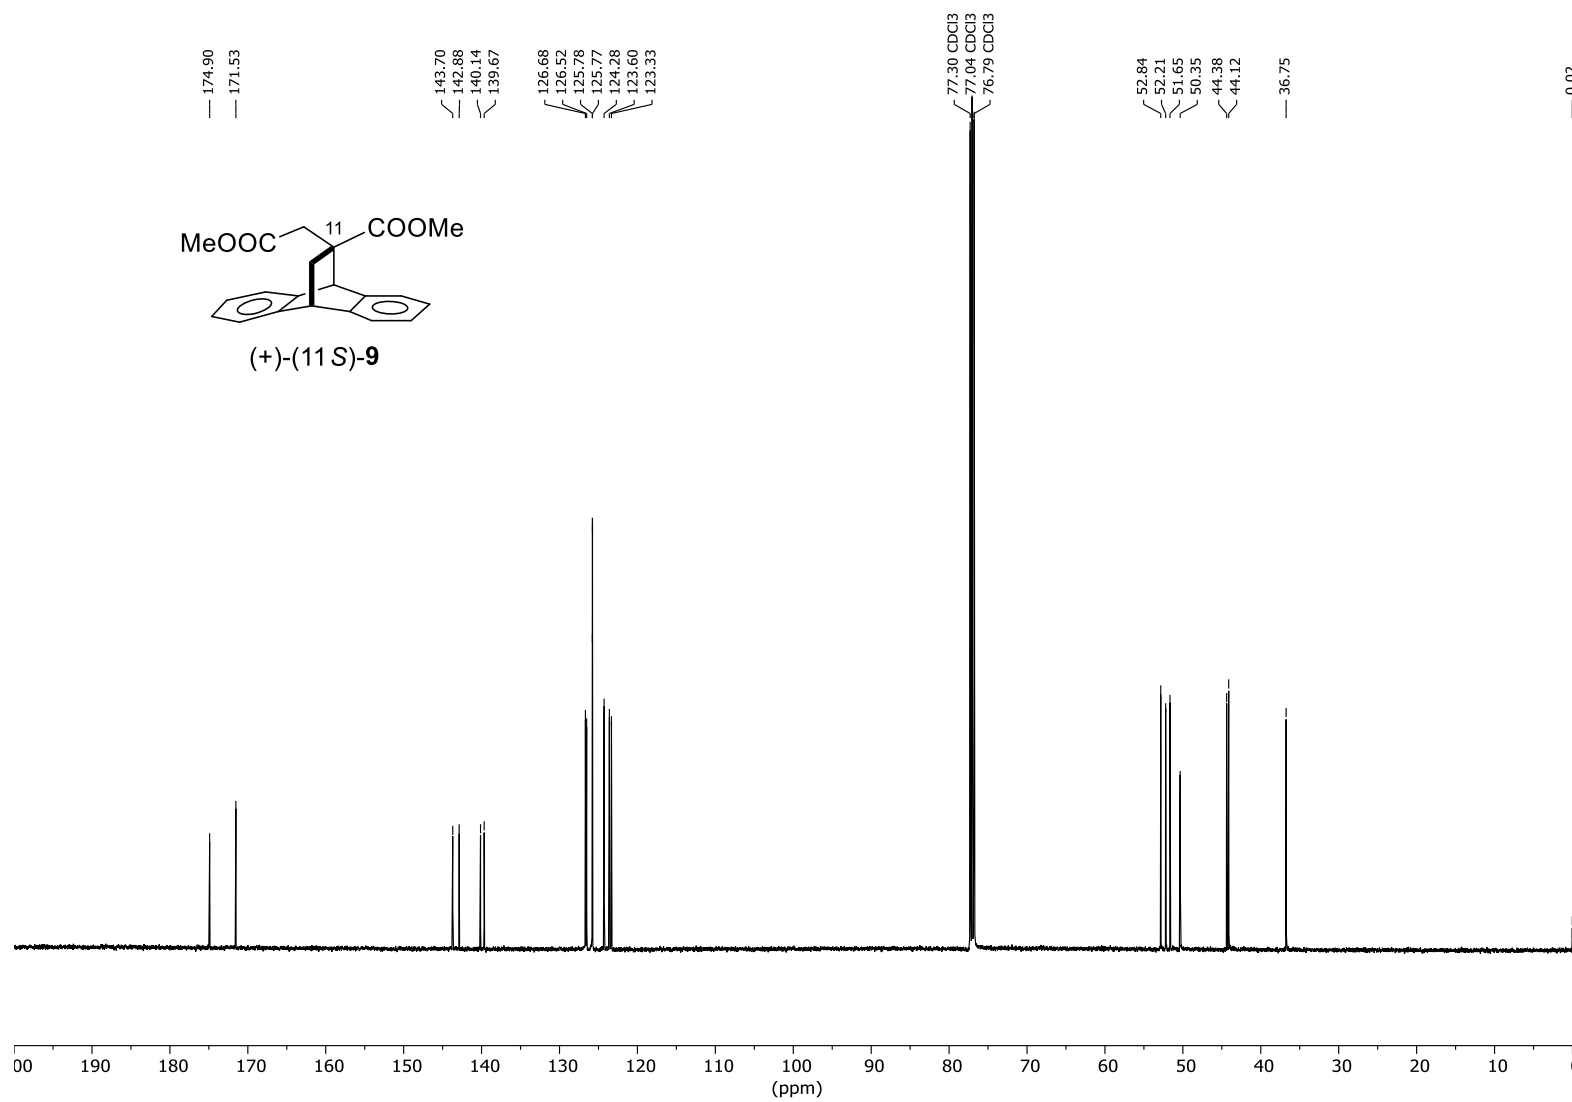

**Figure S8** <sup>13</sup>C NMR (126 MHz, CDCl<sub>3</sub>) spectrum of (+)-(11S)-dimethyl itaconate-anthracene adduct, (+)-(11S)-9

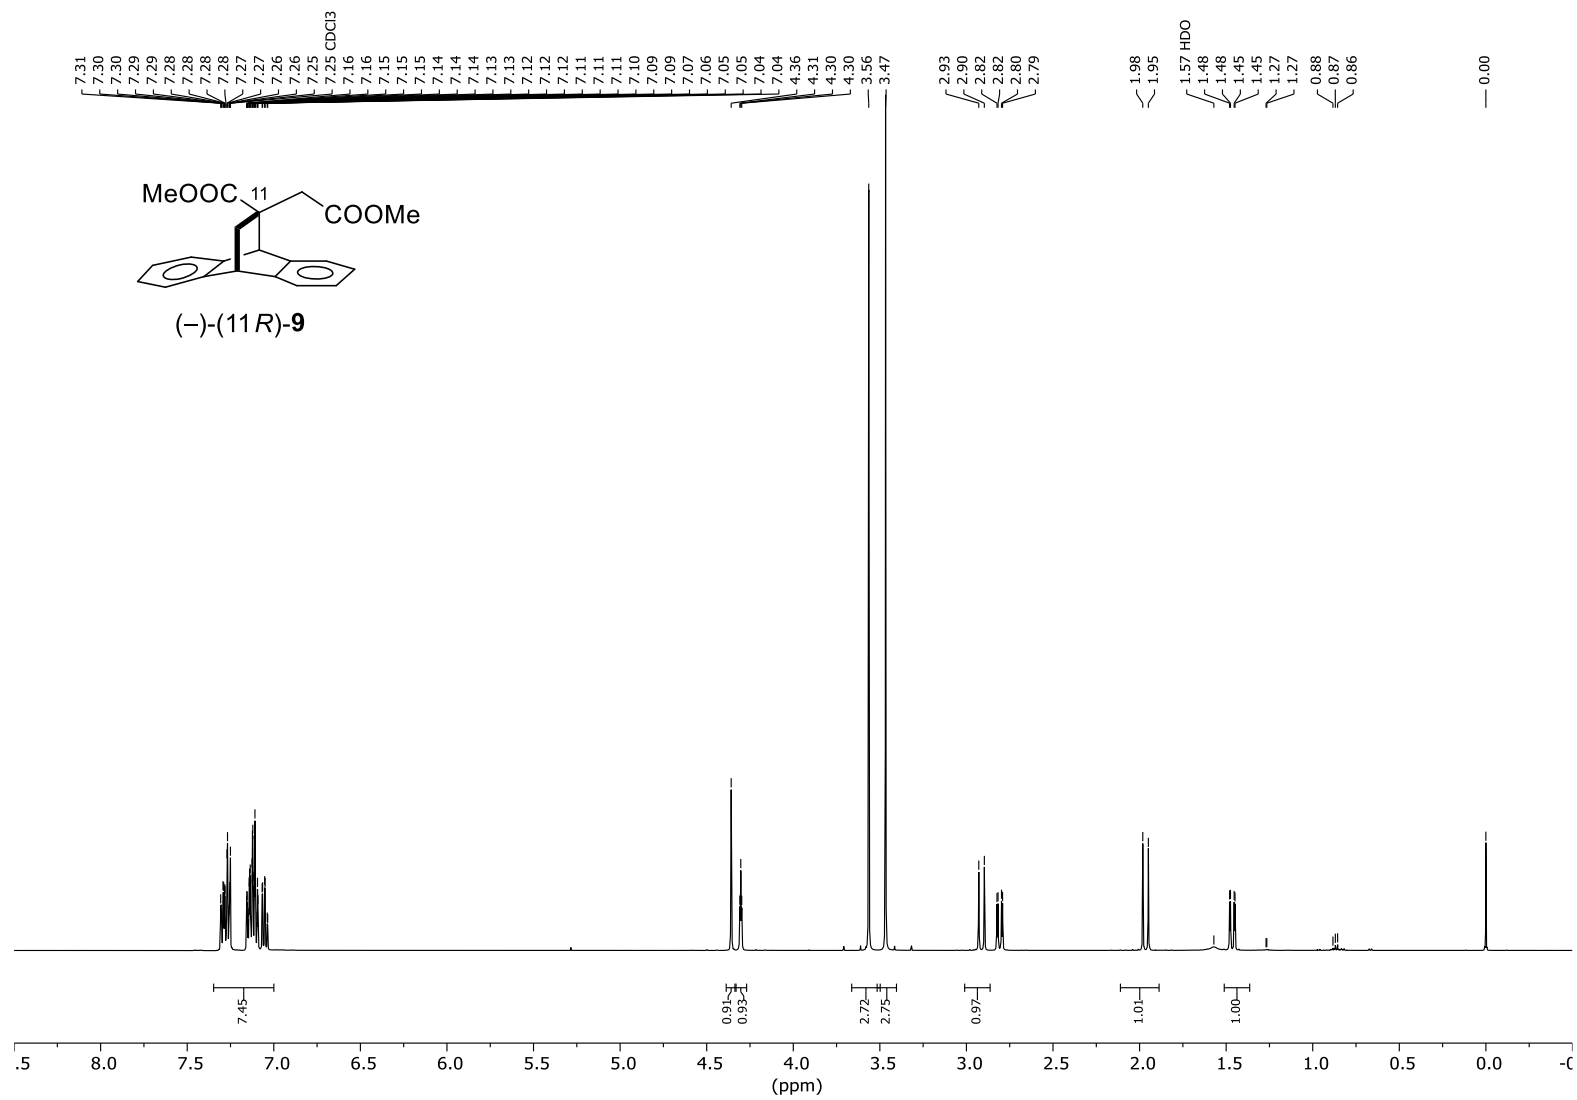

Figure S9  $^1\text{H}$  NMR (500 MHz,  $\text{CDCl}_3$ ) spectrum of (-)-(11R)-dimethyl itaconate-anthracene adduct, (-)-(11R)-9

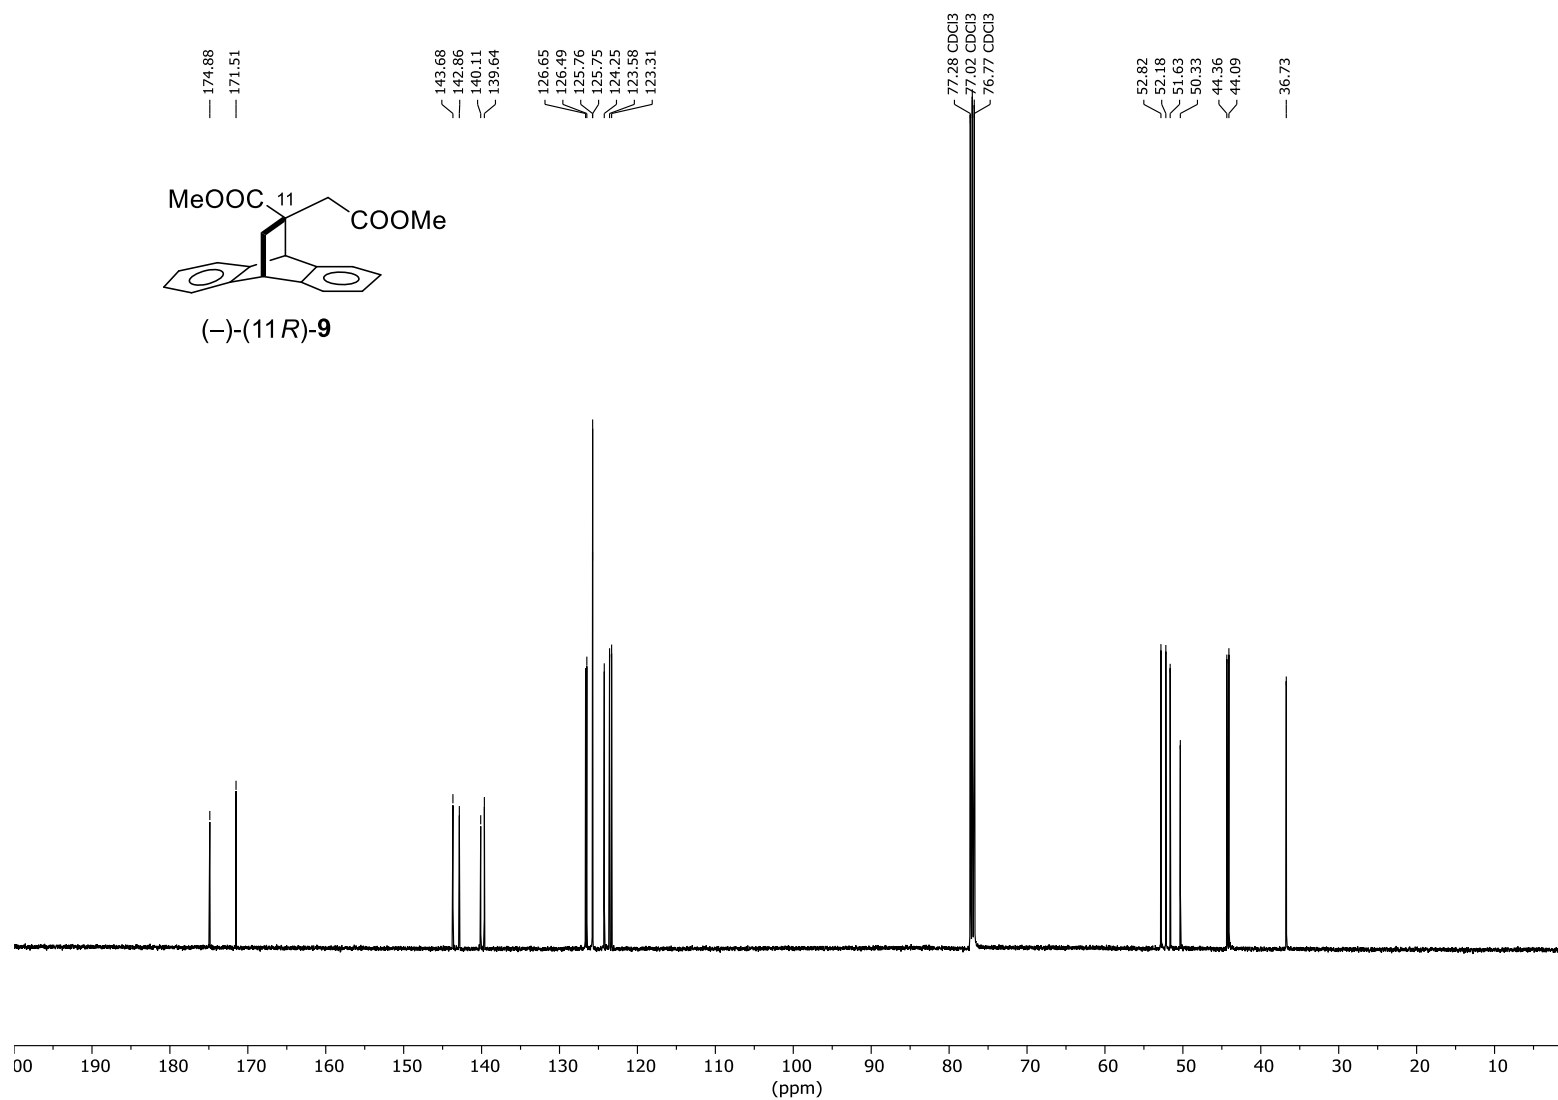

**Figure S10** <sup>13</sup>C NMR (126 MHz, CDCl<sub>3</sub>) spectrum of (-)-(11R)-dimethyl itaconate-anthracene adduct, (-)-(11R)-9

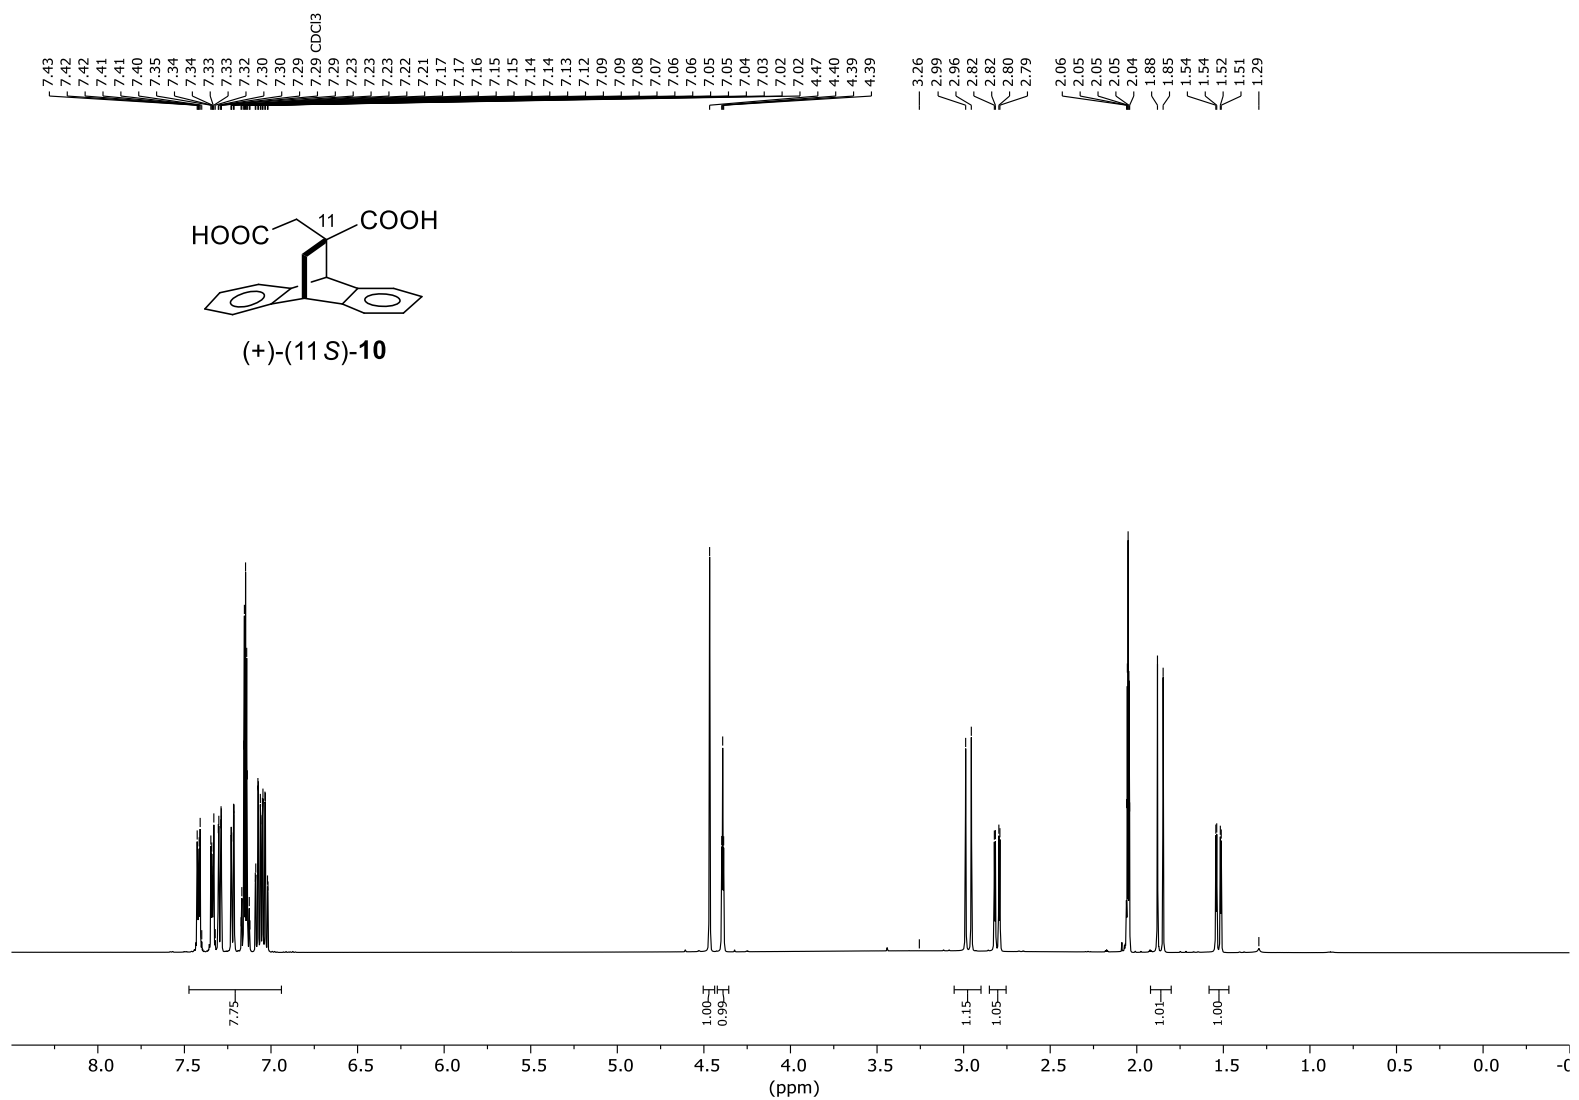

**Figure S11** <sup>1</sup>H NMR (500 MHz, Acetone-*d*<sub>6</sub>) spectrum of (+)-(11S)-itaconic acid-anthracene adduct, (+)-(11S)-10

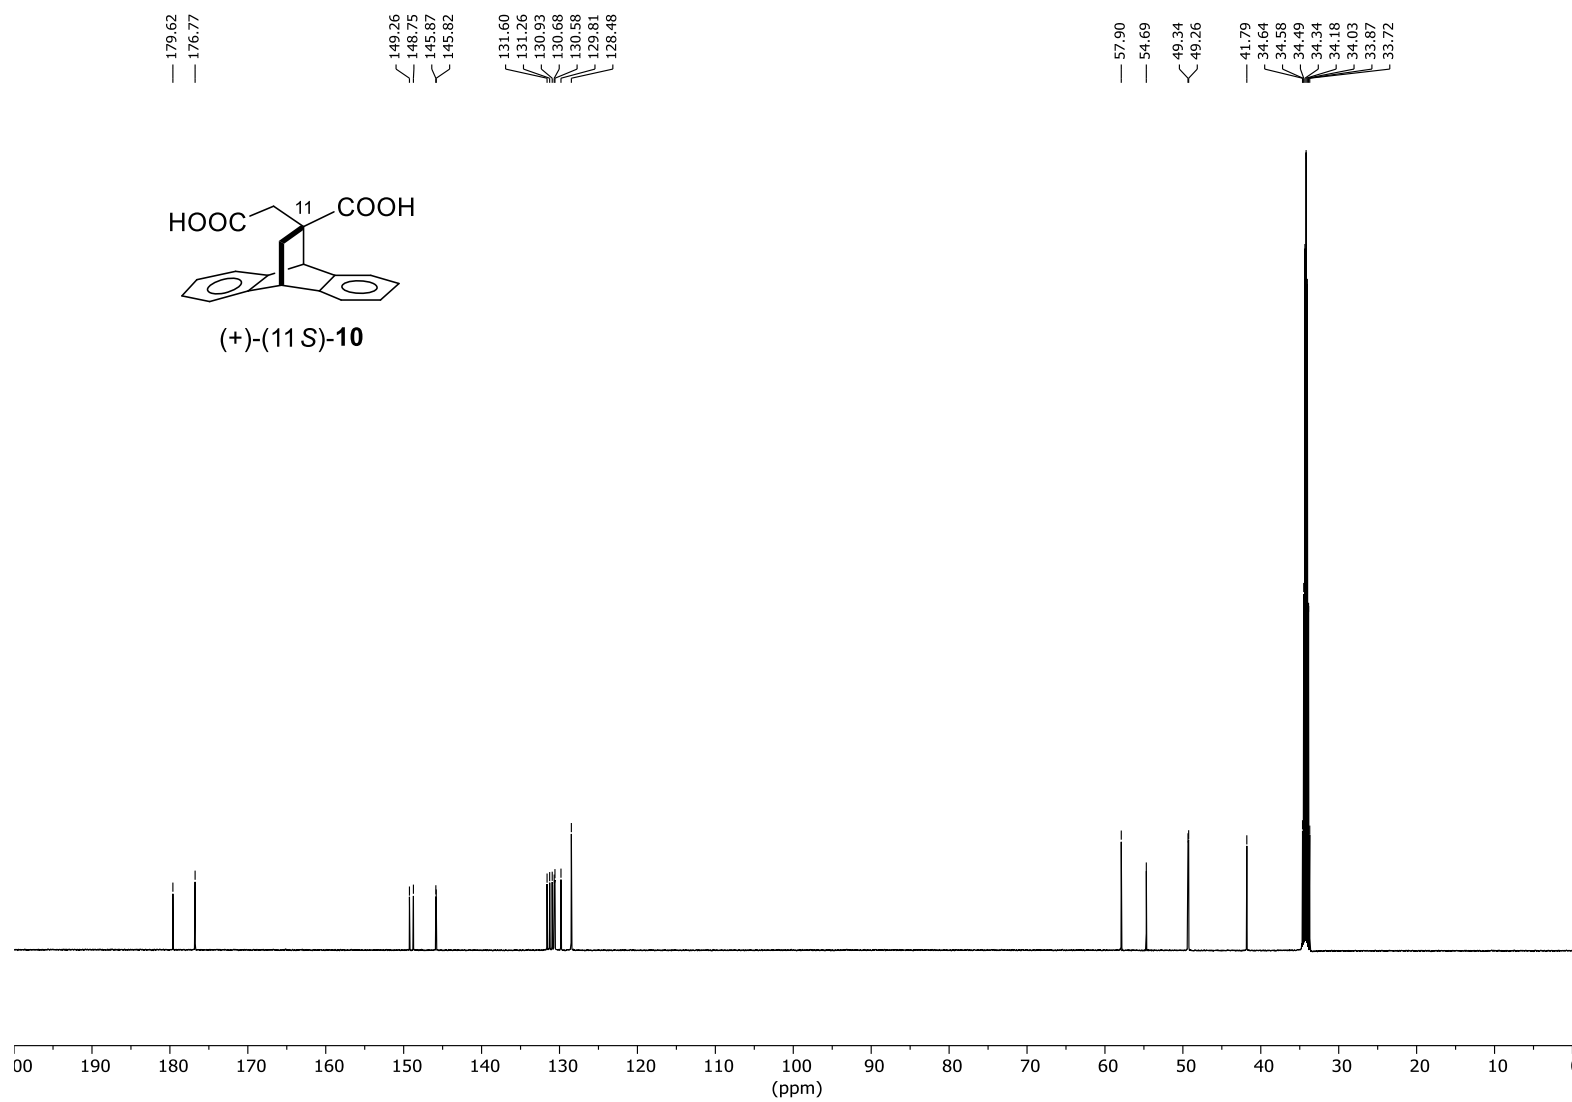

**Figure S12** <sup>13</sup>C NMR (126 MHz, Acetone-*d*<sub>6</sub>) spectra of (+)-(11*S*)-itaconic acid-anthracene adduct, (+)-(11*S*)-10

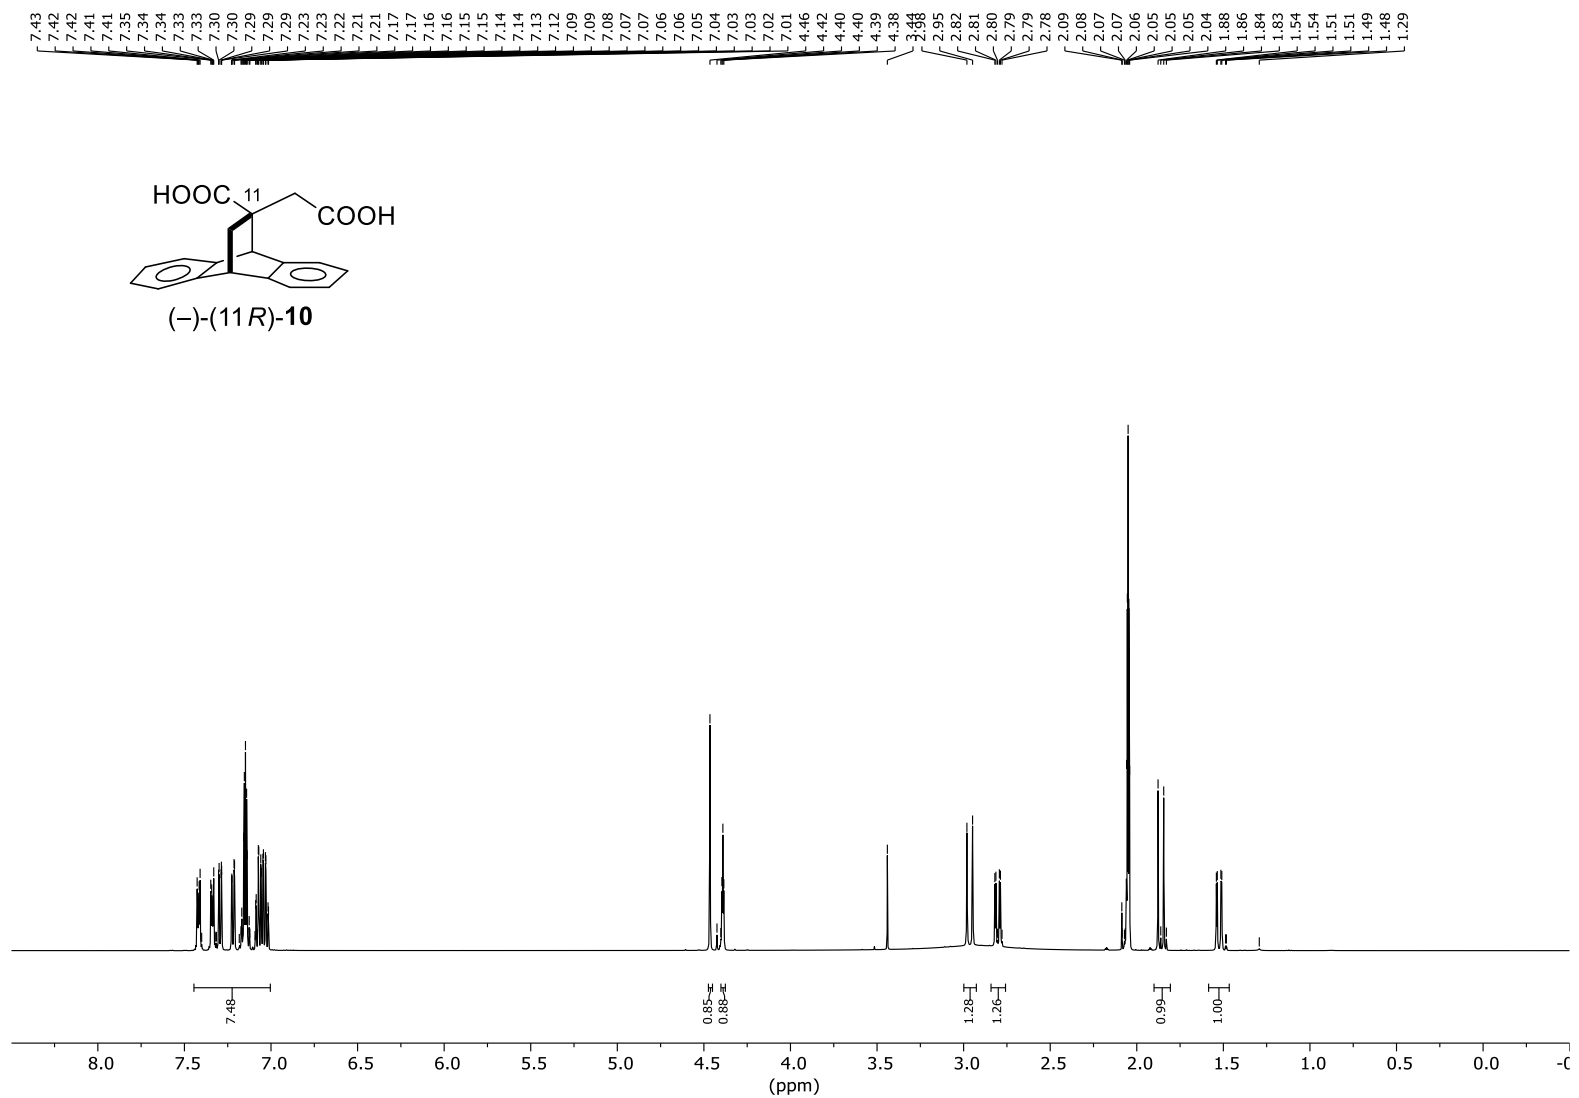

**Figure S13** <sup>1</sup>H NMR (500 MHz, Acetone-*d*<sub>6</sub>) spectrum of (-)-(11S)-itaconic acid-anthracene adduct, (-)-(11S)-10

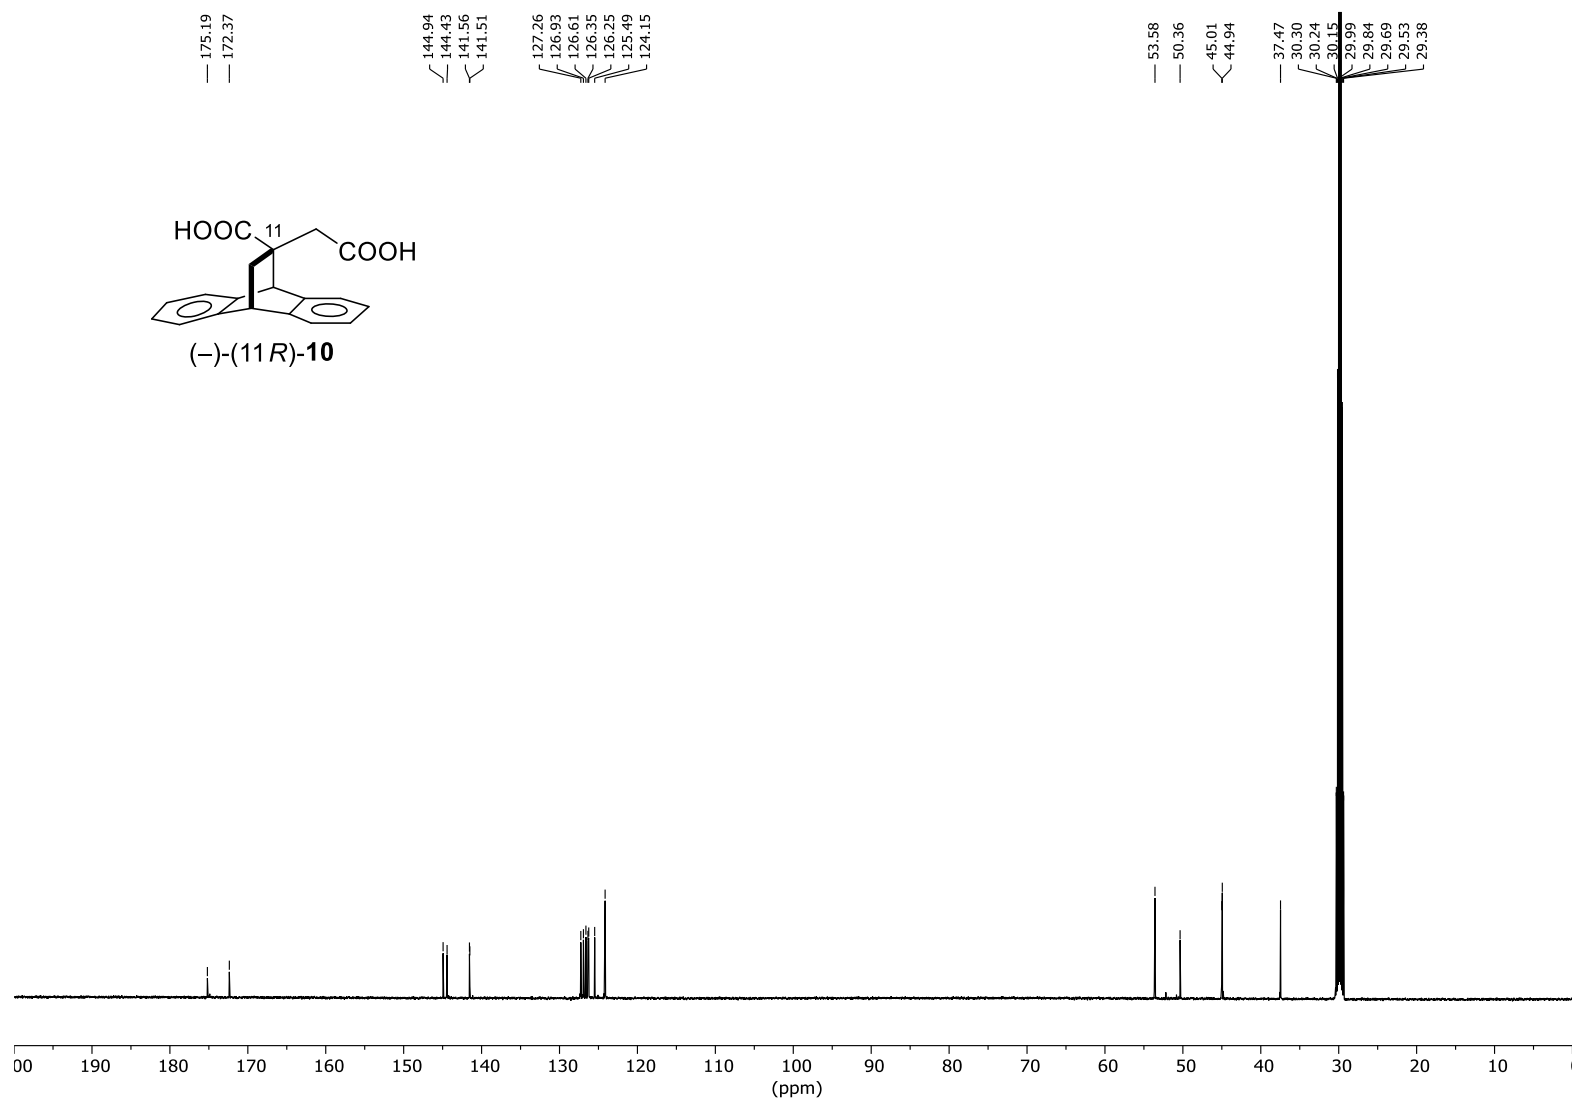

**Figure S14** <sup>13</sup>C NMR (126 MHz, Acetone-*d*<sub>6</sub>) spectra of (-)-(11S)-itaconic acid-anthracene adduct, (-)-(11S)-10

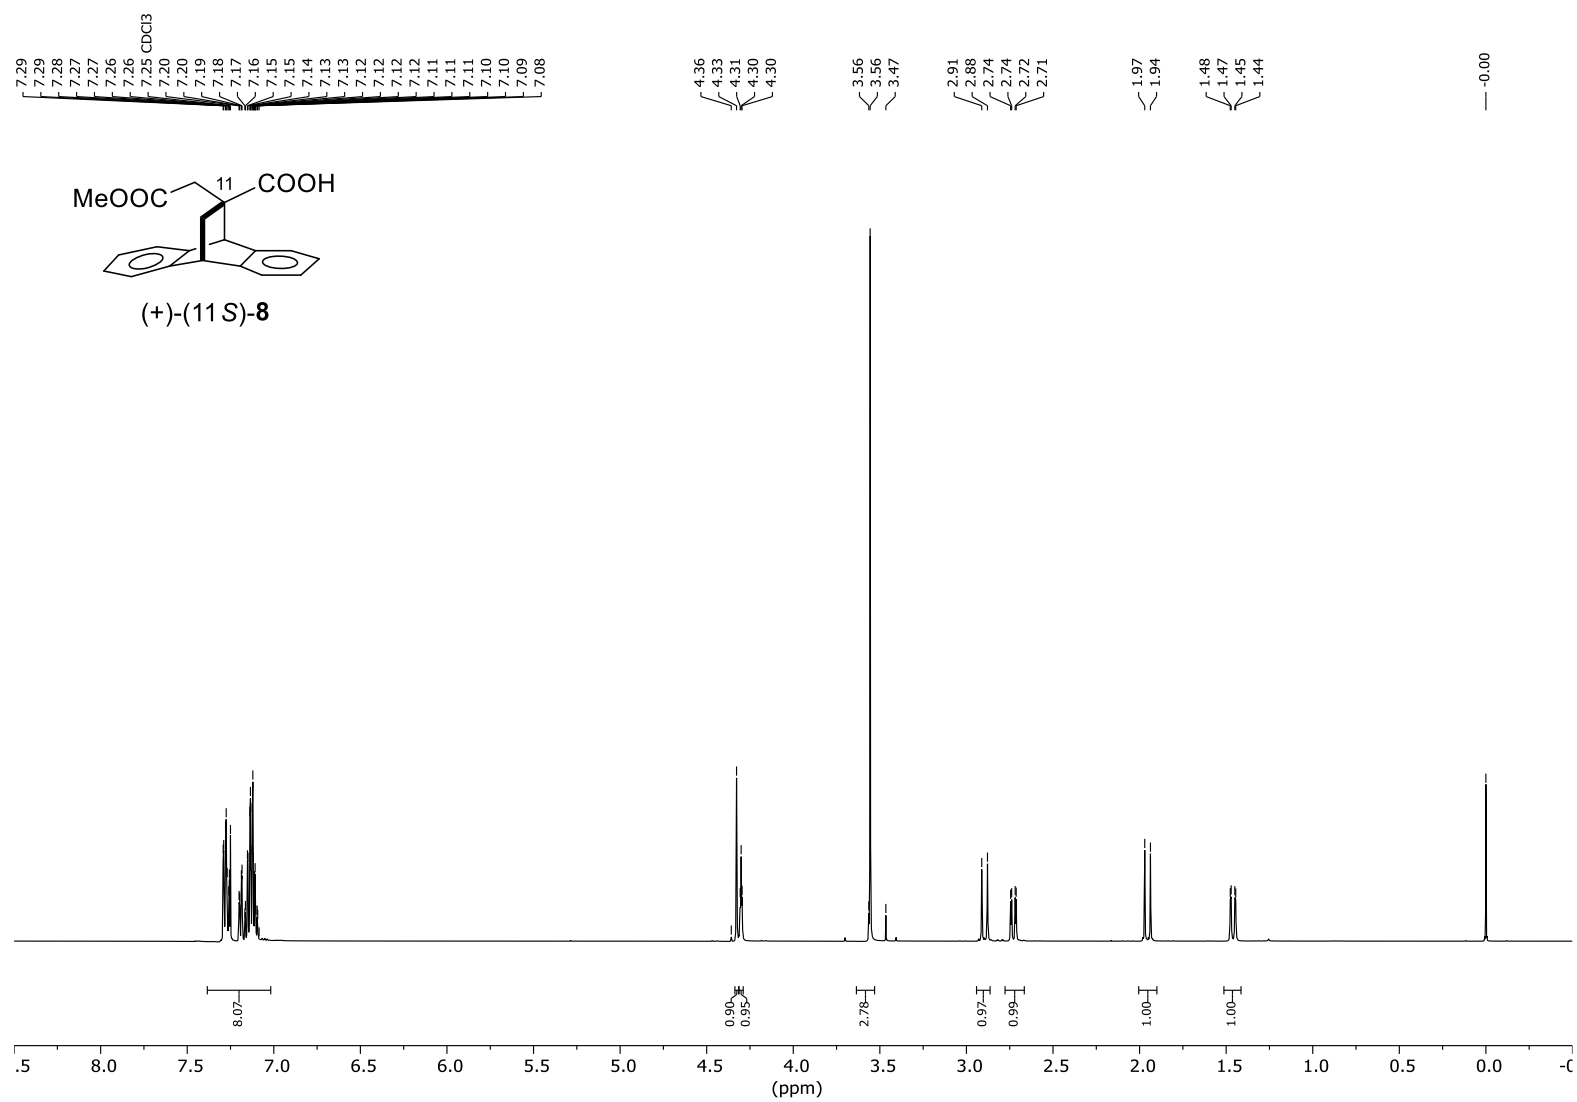

**Figure S15** <sup>1</sup>H NMR (500 MHz, CDCl<sub>3</sub>) spectrum of (+)-(11S)-methyl itaconate-anthracene adduct, (+)-(11S)-8



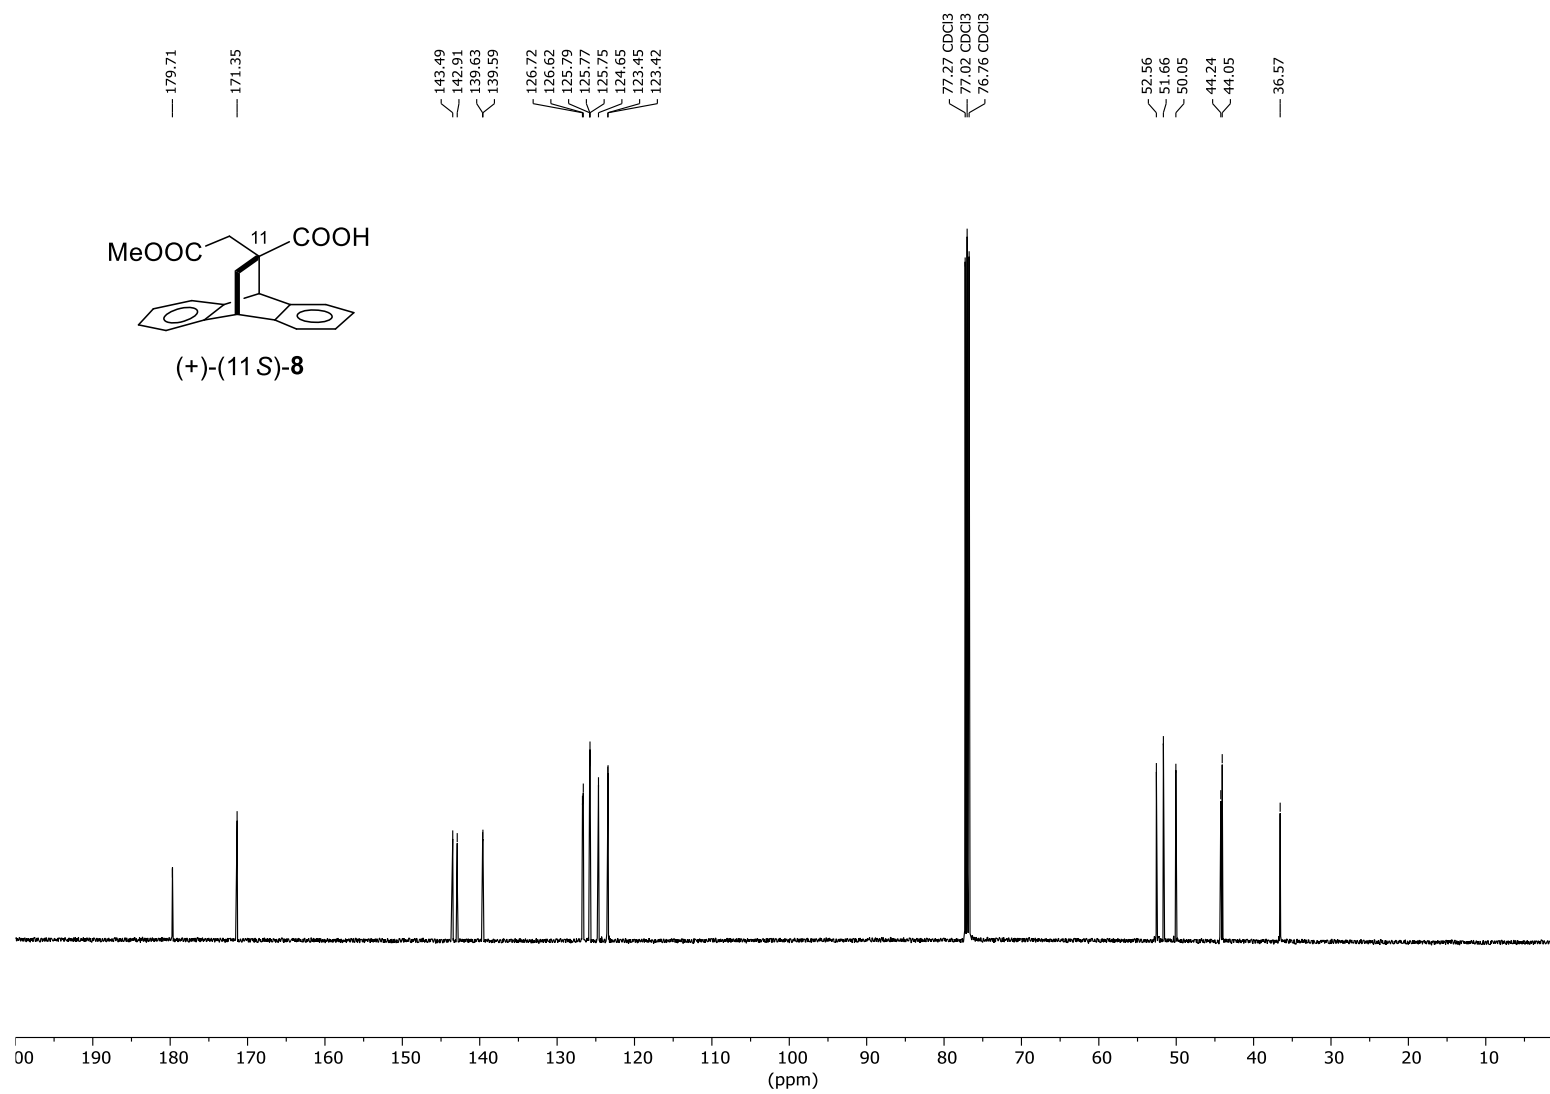

Figure S16  $^{13}\text{C}$  NMR (126 MHz,  $\text{CDCl}_3$ ) spectrum of (+)-(11S)-methyl itaconate-anthracene adduct, (+)-(11S)-8

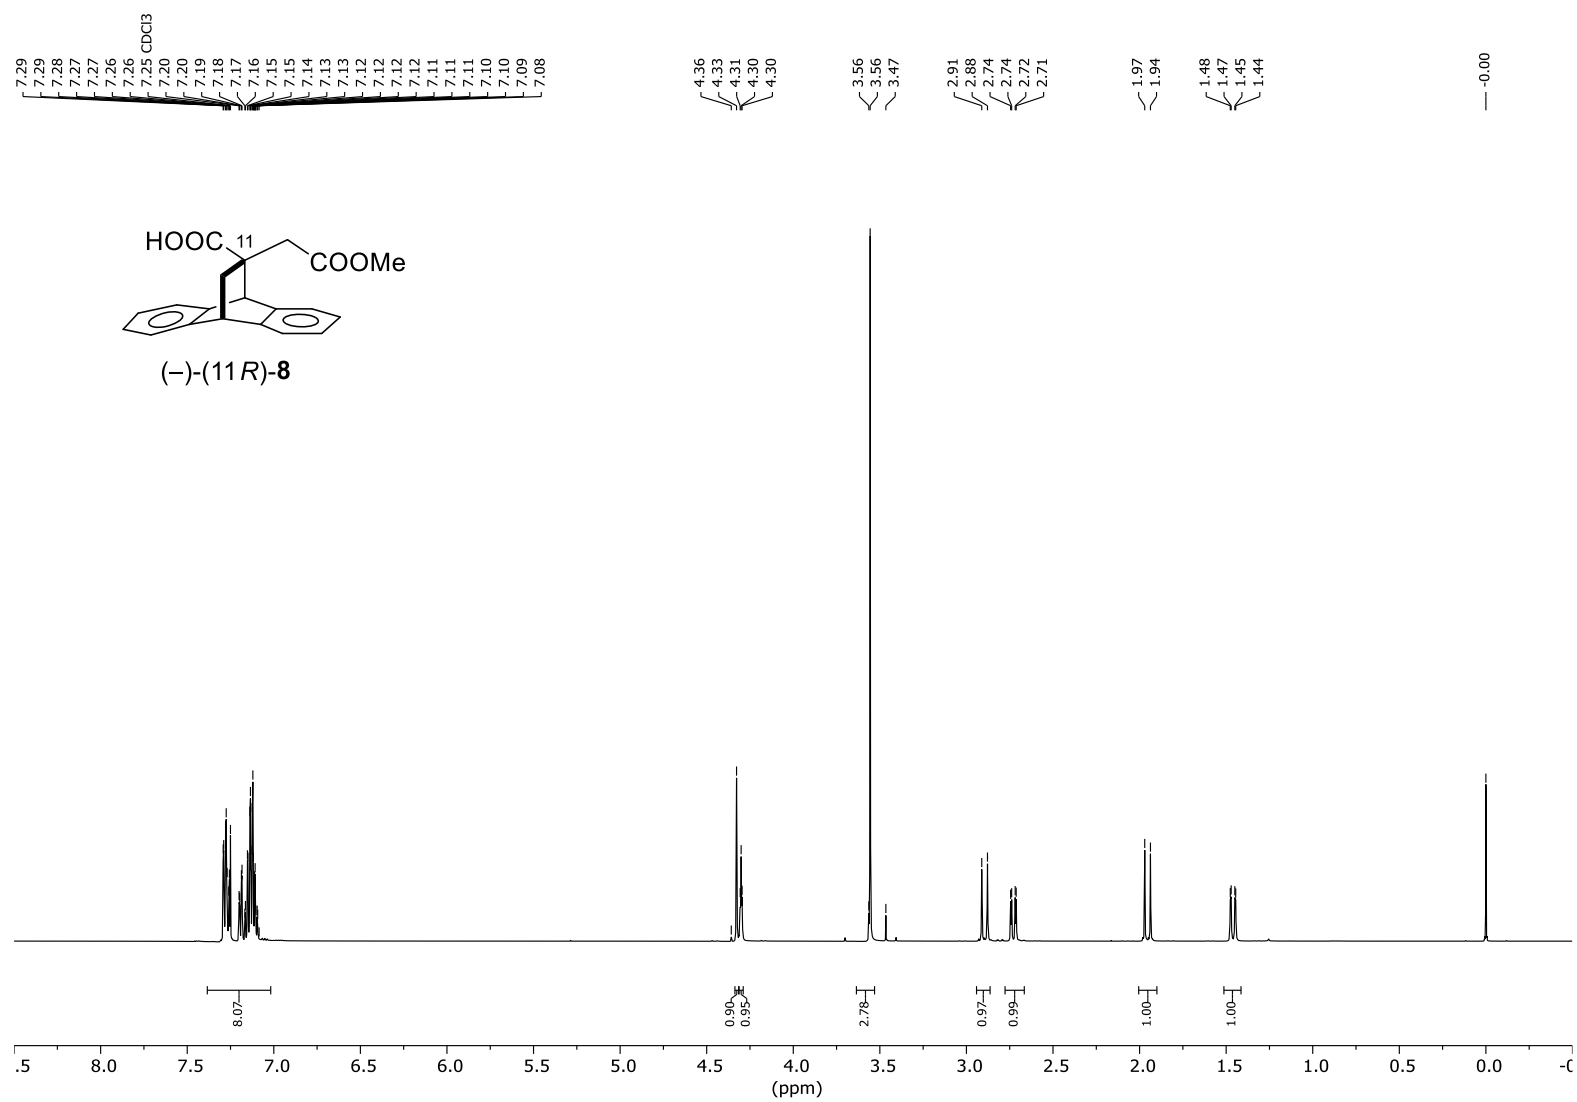

Figure S17 <sup>1</sup>H NMR (500 MHz, CDCl<sub>3</sub>) spectrum of (-)-(11R)-methyl itaconate-anthracene adduct, (-)-(11R)-8

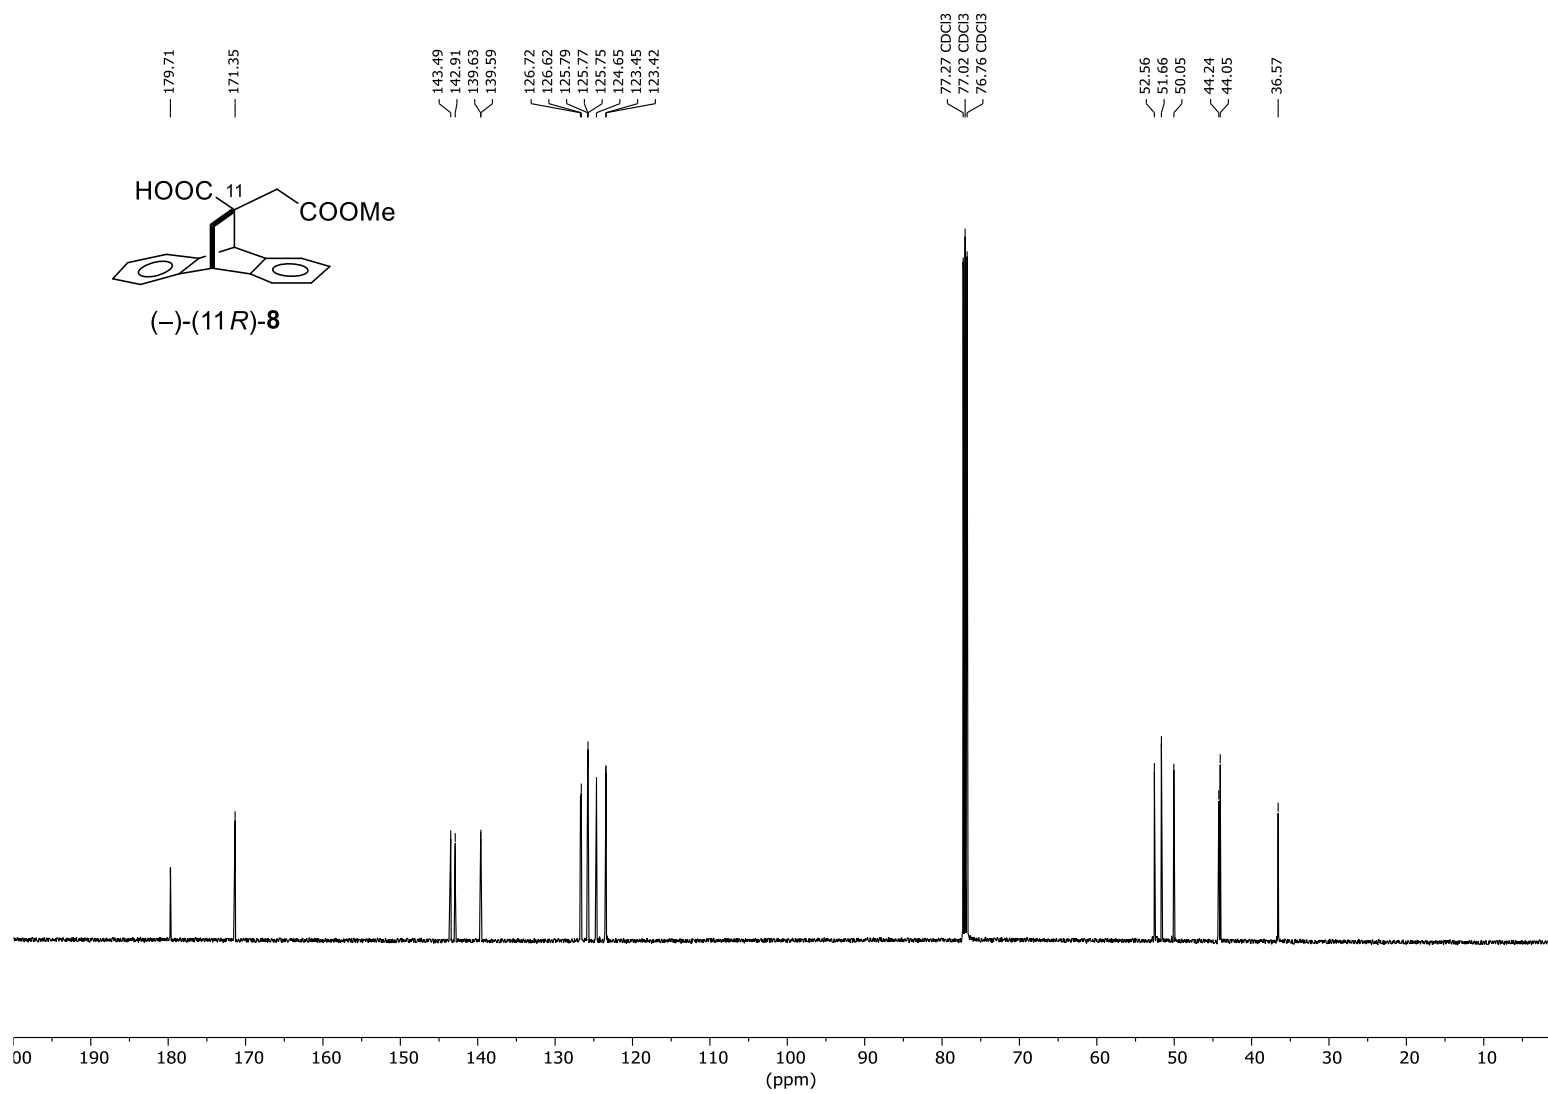

Figure S18 <sup>13</sup>C NMR (126 MHz, CDCl<sub>3</sub>) spectrum of (-)-(11R)-methyl itaconate-anthracene adduct, (-)-(11R)-8

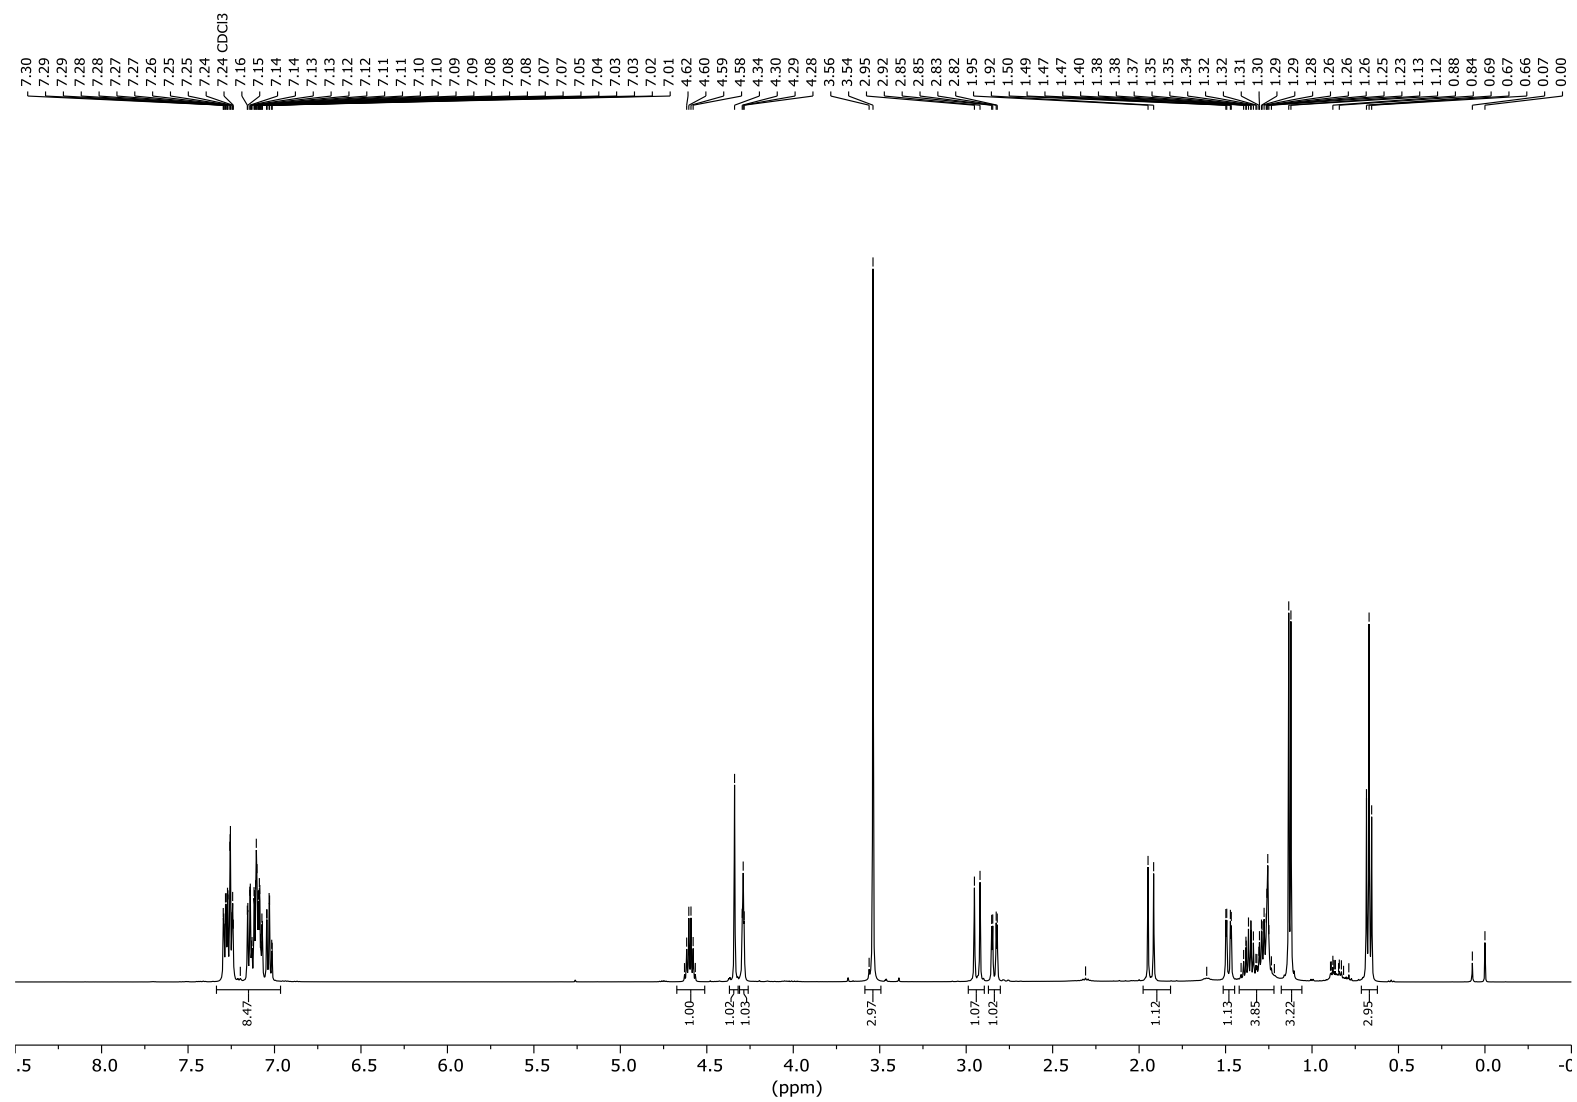

Figure S19 <sup>1</sup>H NMR (500 MHz, CDCl<sub>3</sub>) spectrum of (+)-(11*S*,1'*S*)-11

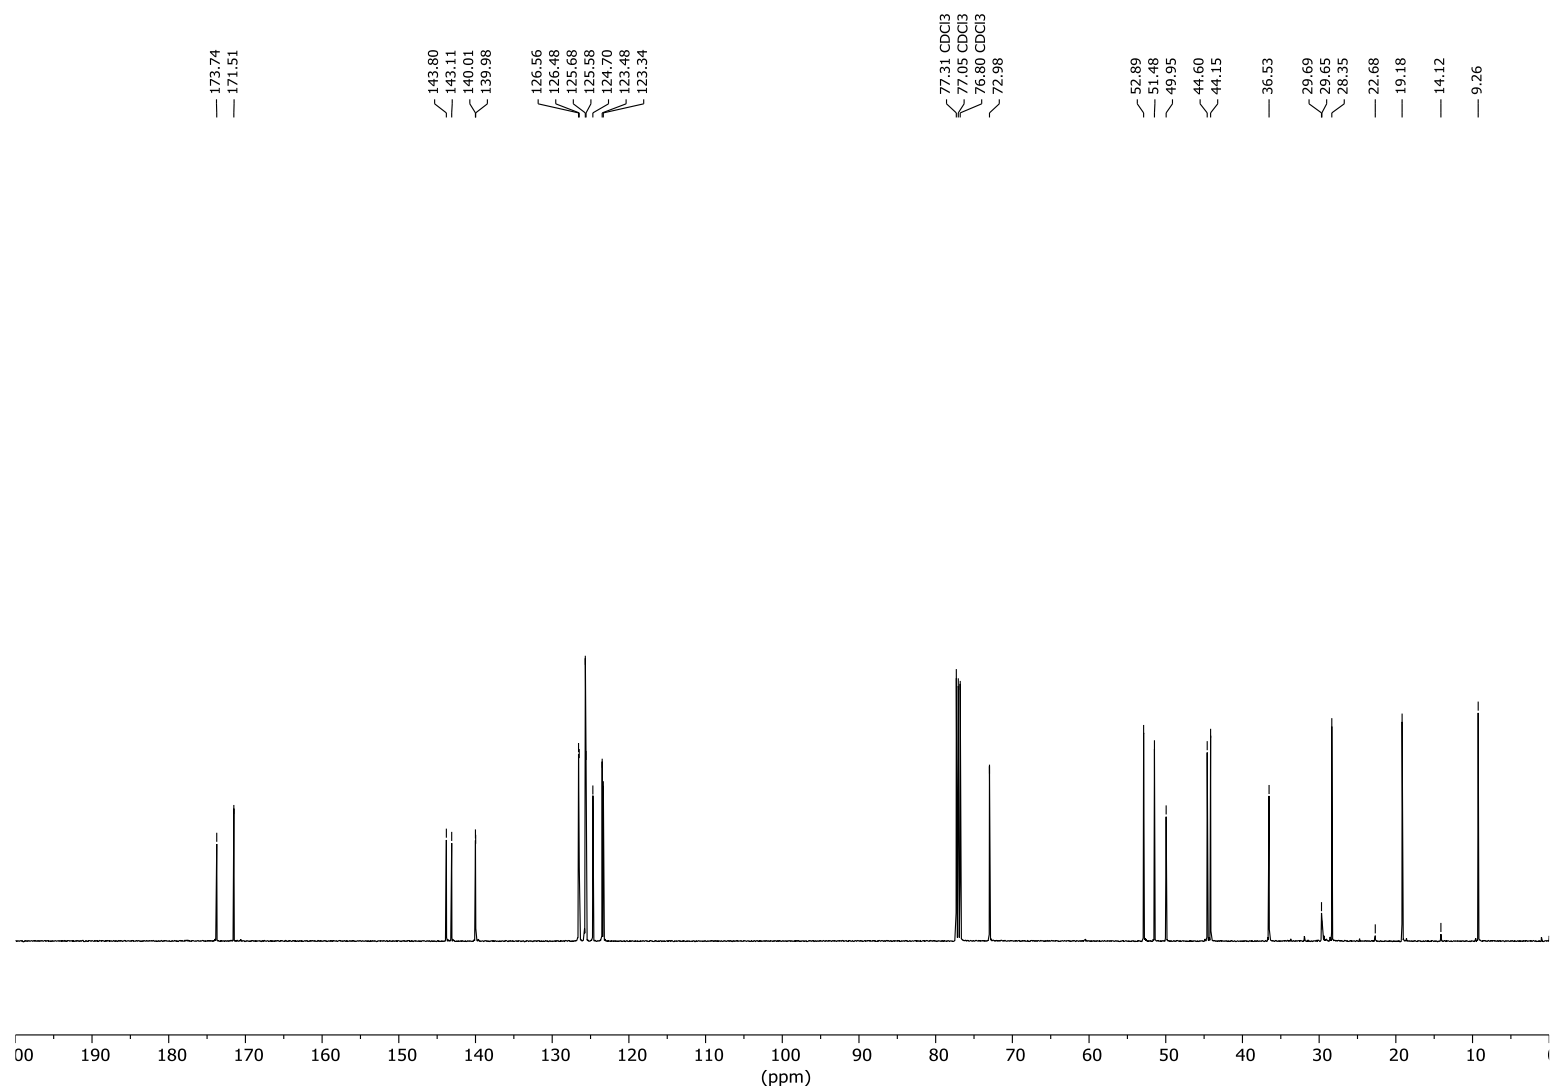

Figure 20 <sup>13</sup>C NMR (126 MHz, CDCl<sub>3</sub>) spectrum of (+)-(11*S*,1'*S*)-**11**

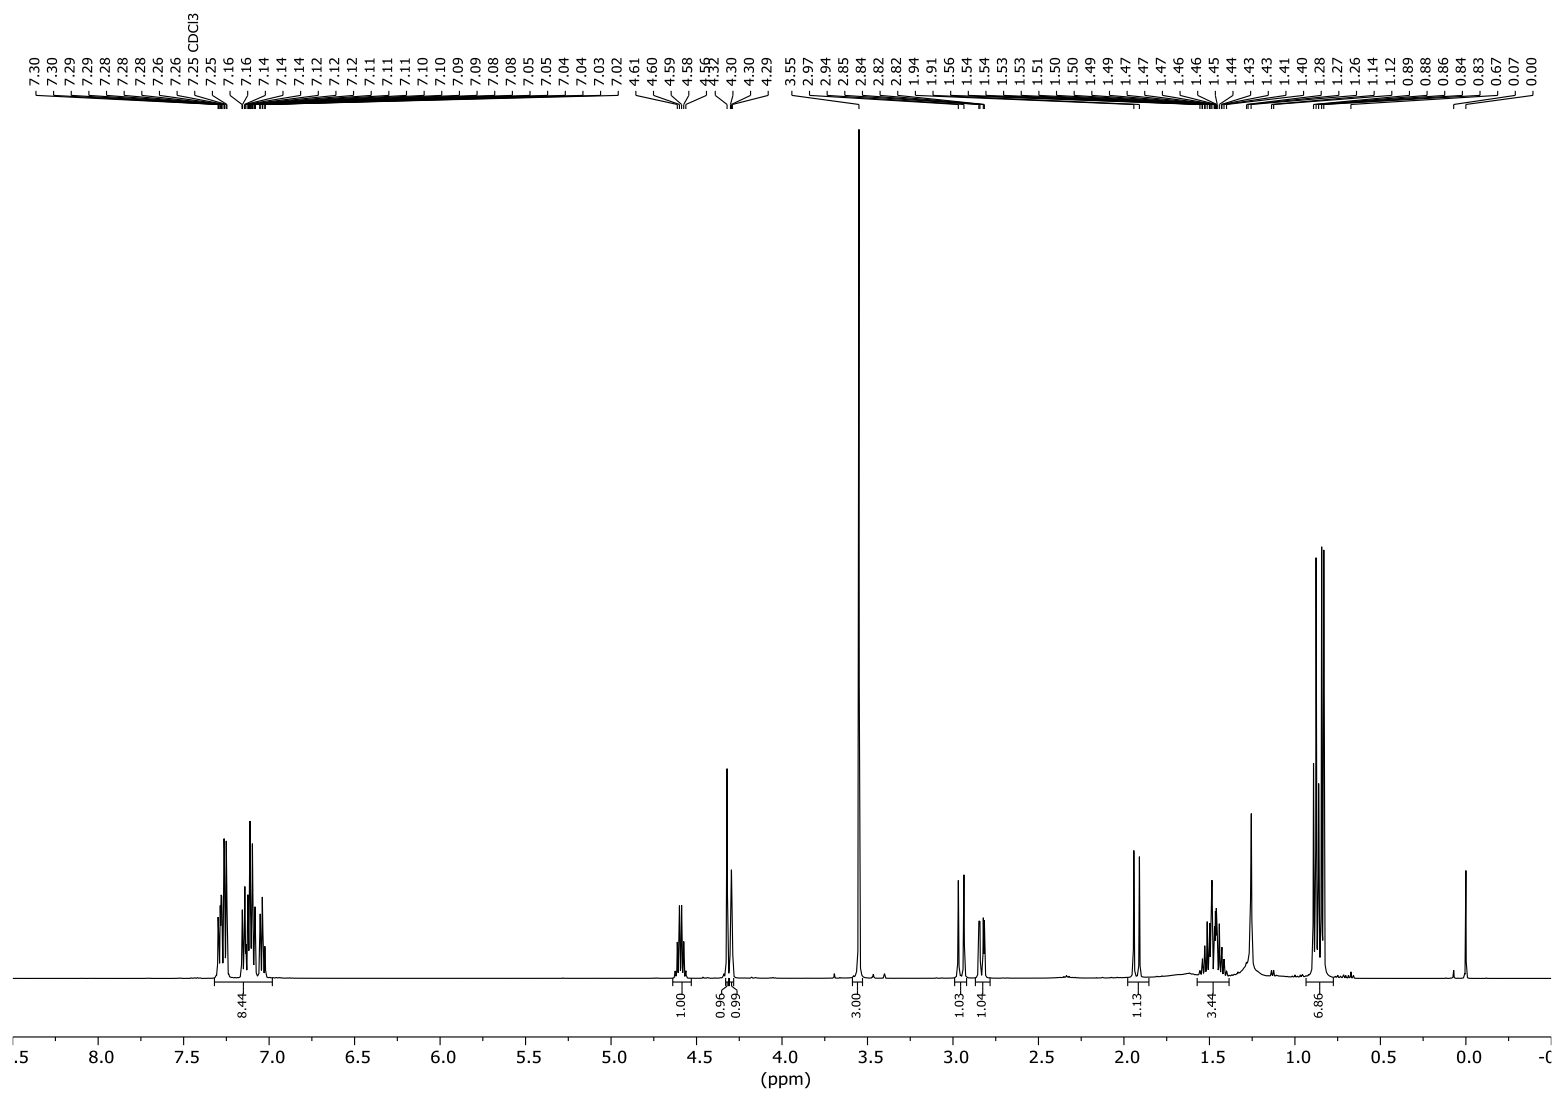

Figure S21 <sup>1</sup>H NMR (500 MHz, CDCl<sub>3</sub>) spectrum of (-)-(11*R*,1'*S*)-**12**

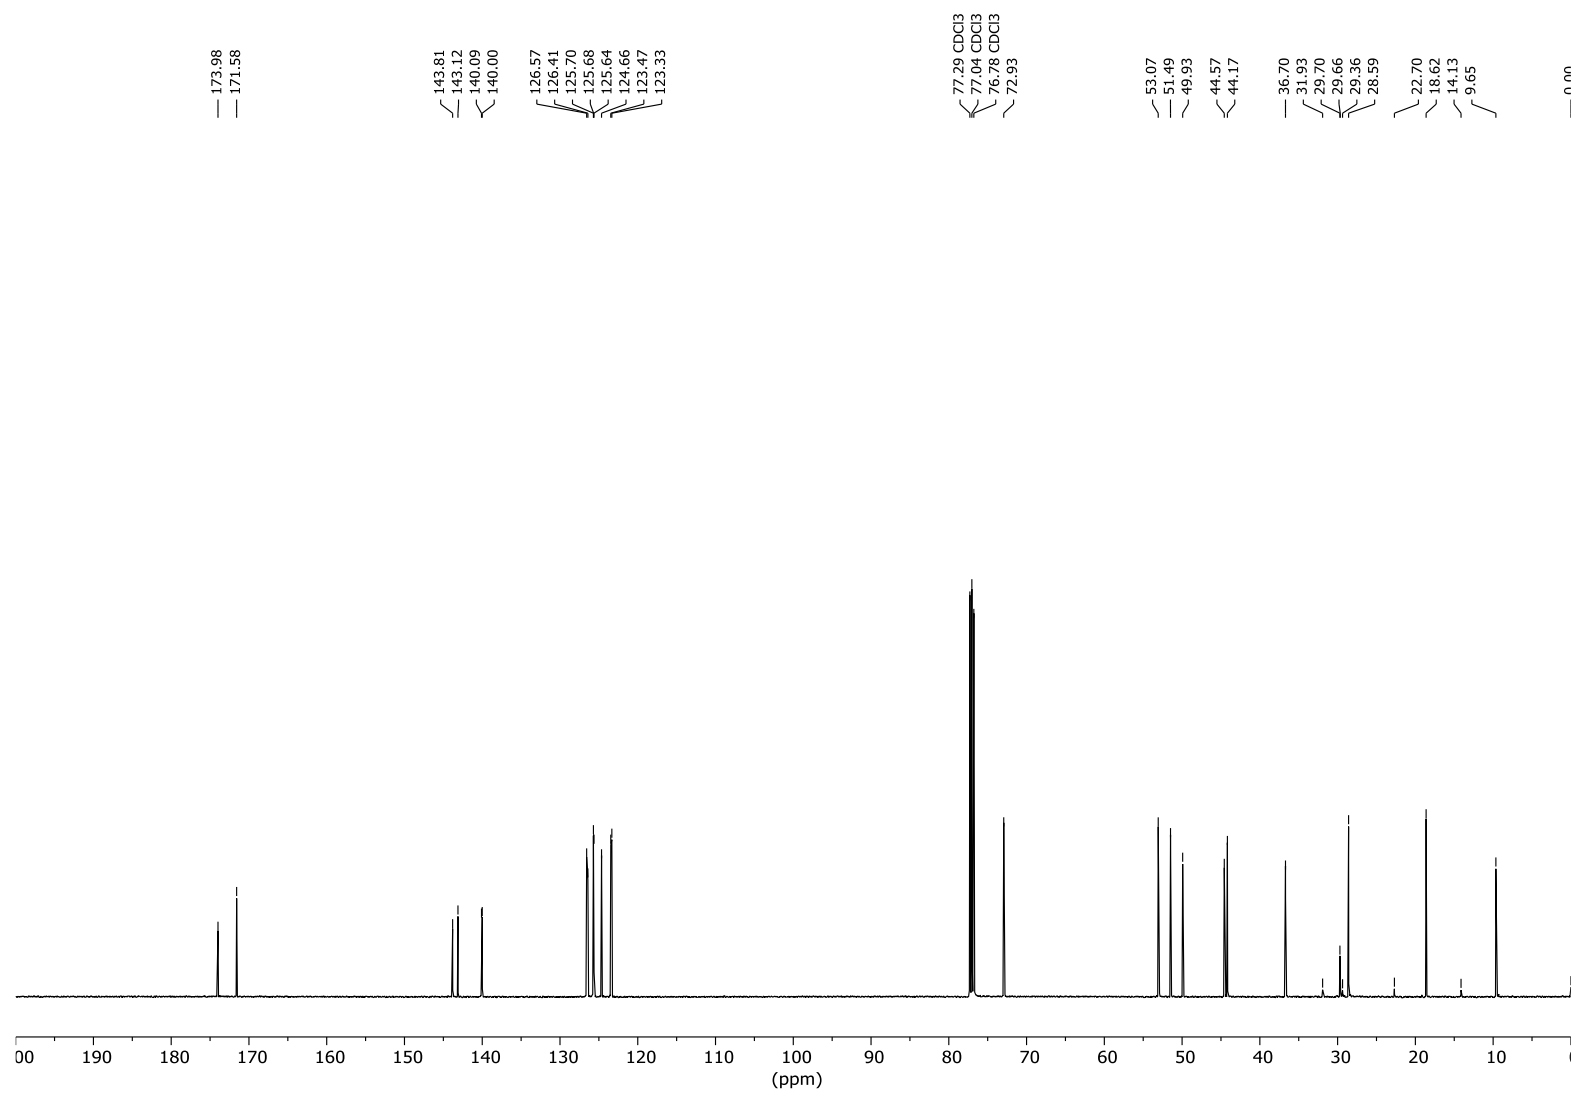

Figure S22 <sup>13</sup>C NMR (126 MHz, CDCl<sub>3</sub>) spectrum of (-)-(11R,1'S)-12

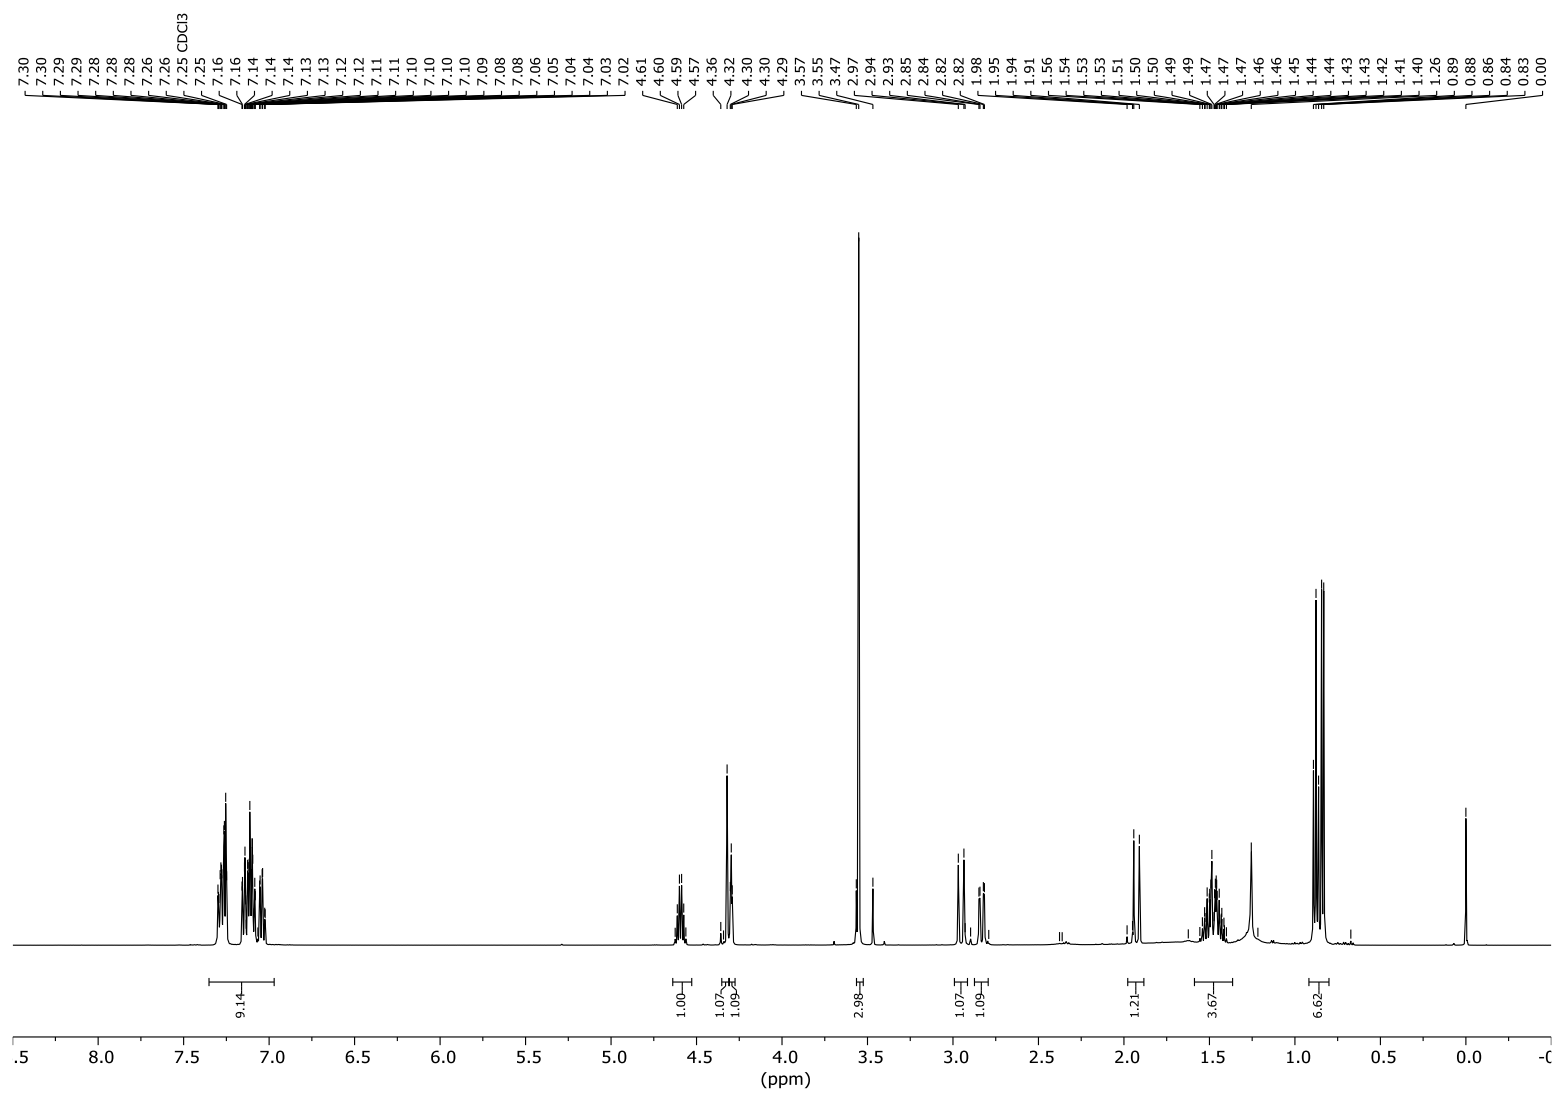

Figure S23  $^1\text{H}$  NMR (500 MHz,  $\text{CDCl}_3$ ) spectrum of (+)-(11*S*,1'*R*)-**13**



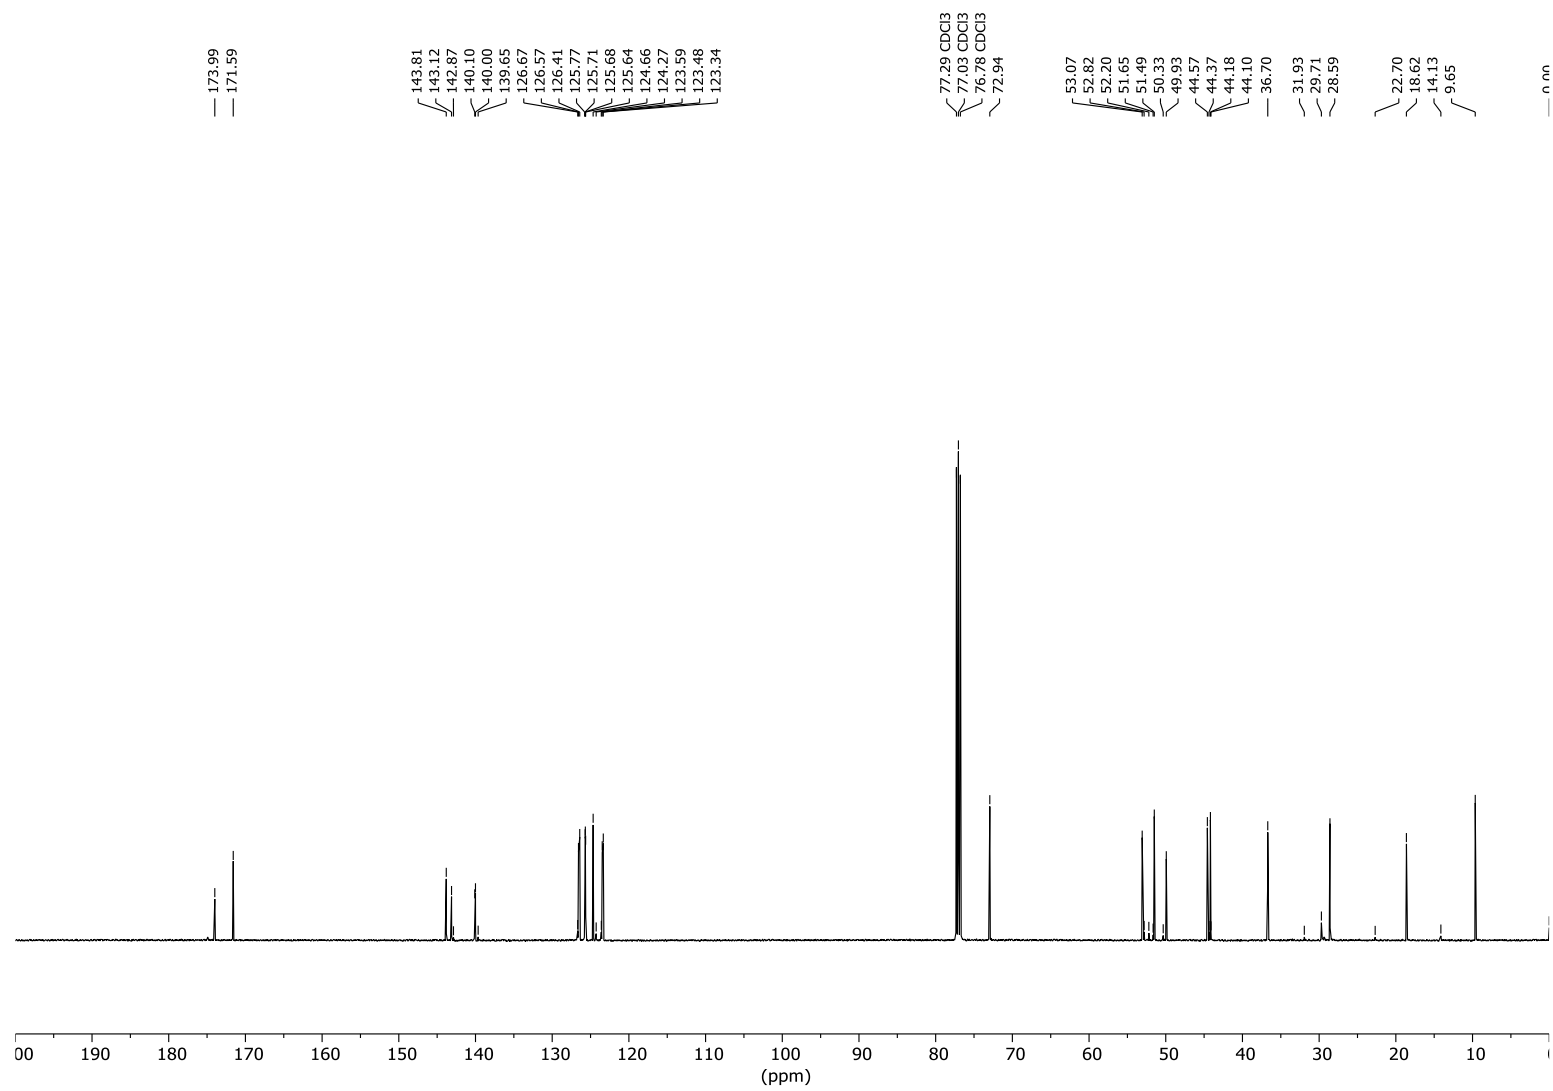

Figure S24 <sup>13</sup>C NMR (126 MHz, CDCl<sub>3</sub>) spectrum of (+)-(11*S*,1'*R*)-13

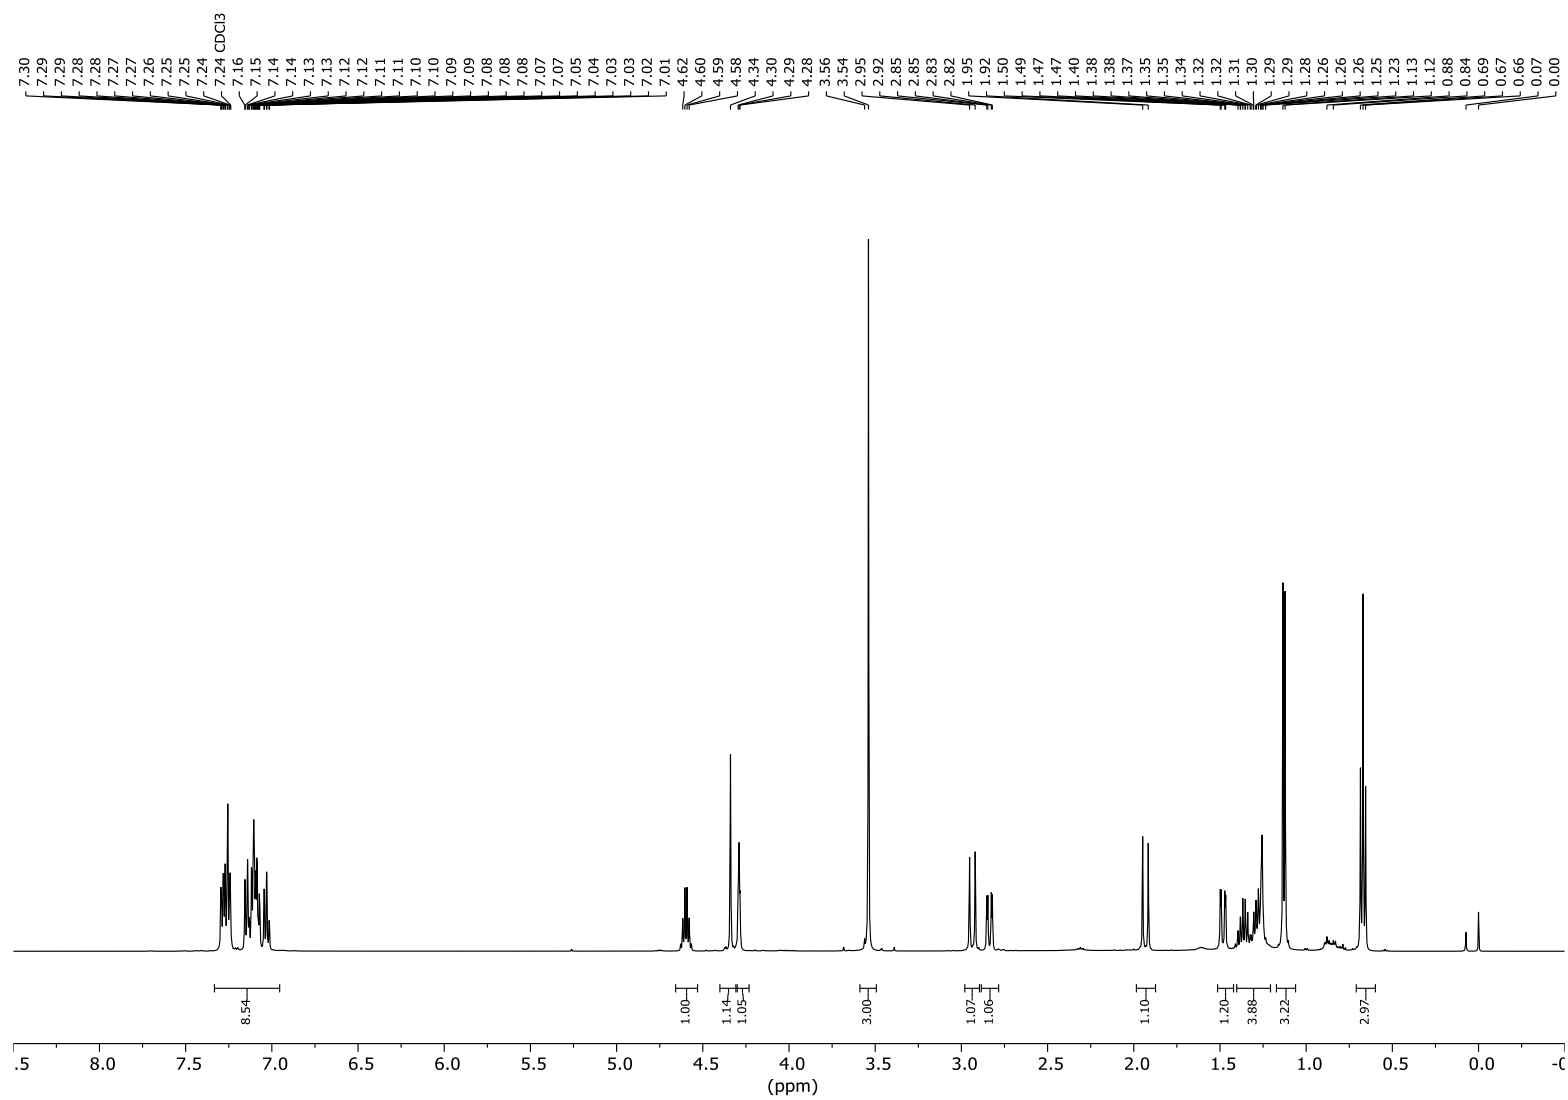

Figure S25  $^1\text{H}$  NMR (500 MHz,  $\text{CDCl}_3$ ) spectrum of  $(-)-(11R,1'R)$ -14

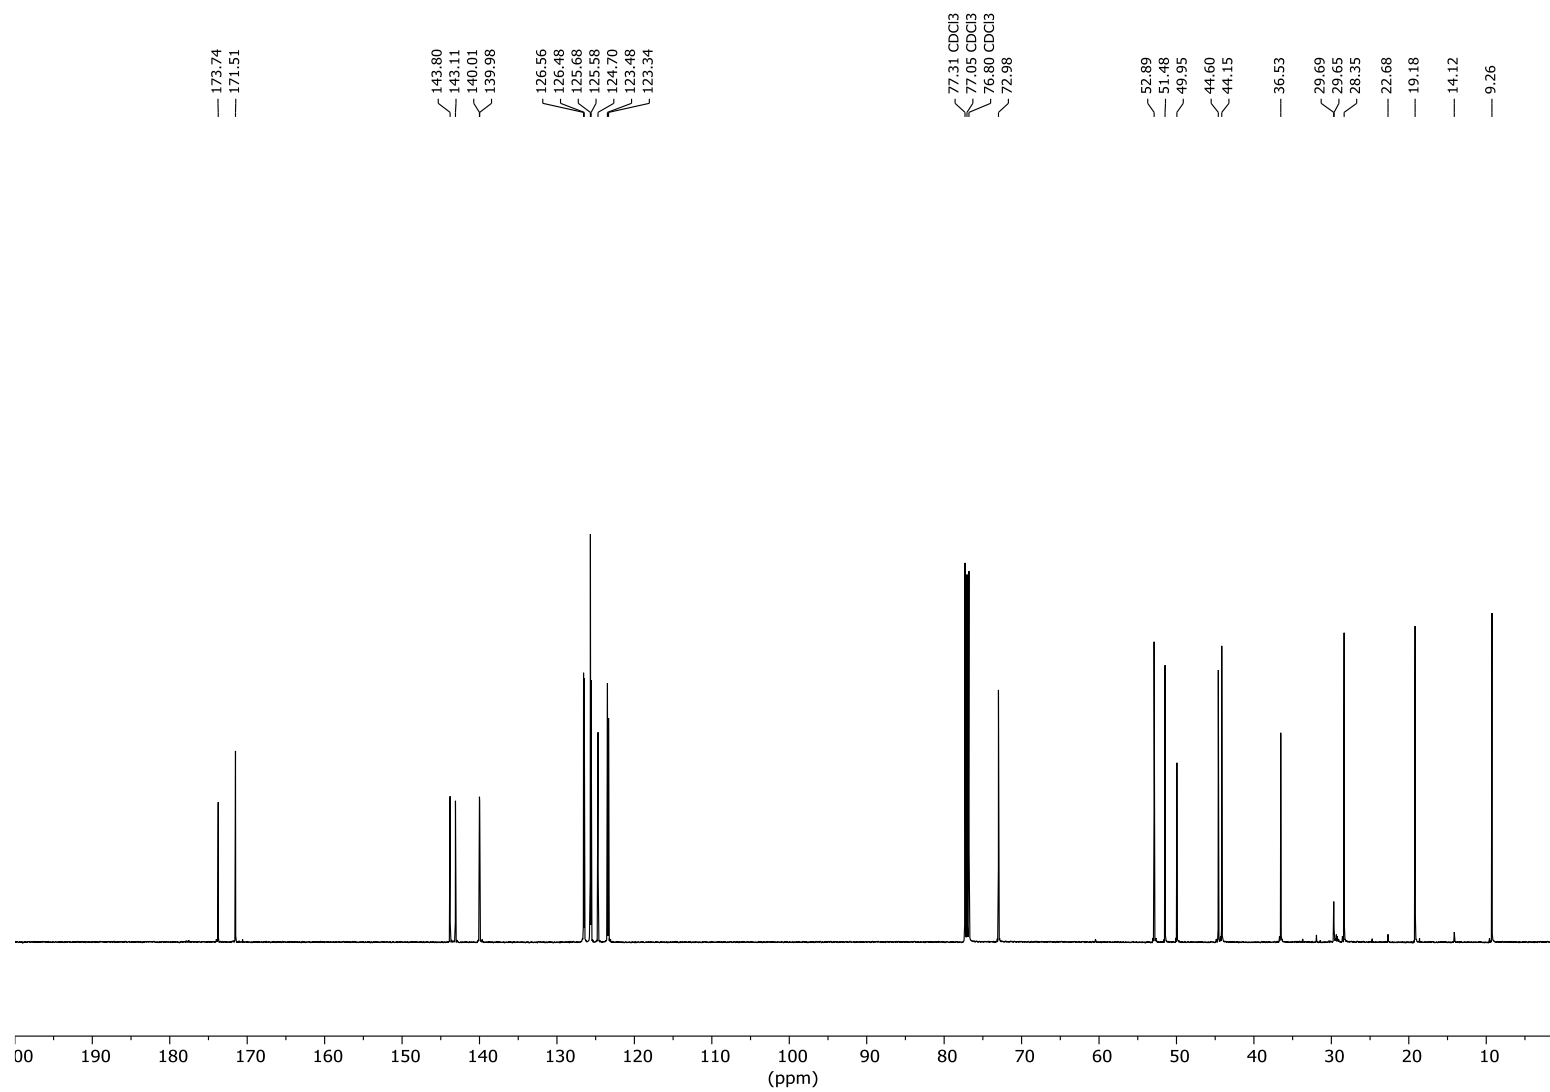

Figure S26 <sup>13</sup>C NMR (126 MHz, CDCl<sub>3</sub>) spectrum of (-)-(11*R*,1'*R*)-14

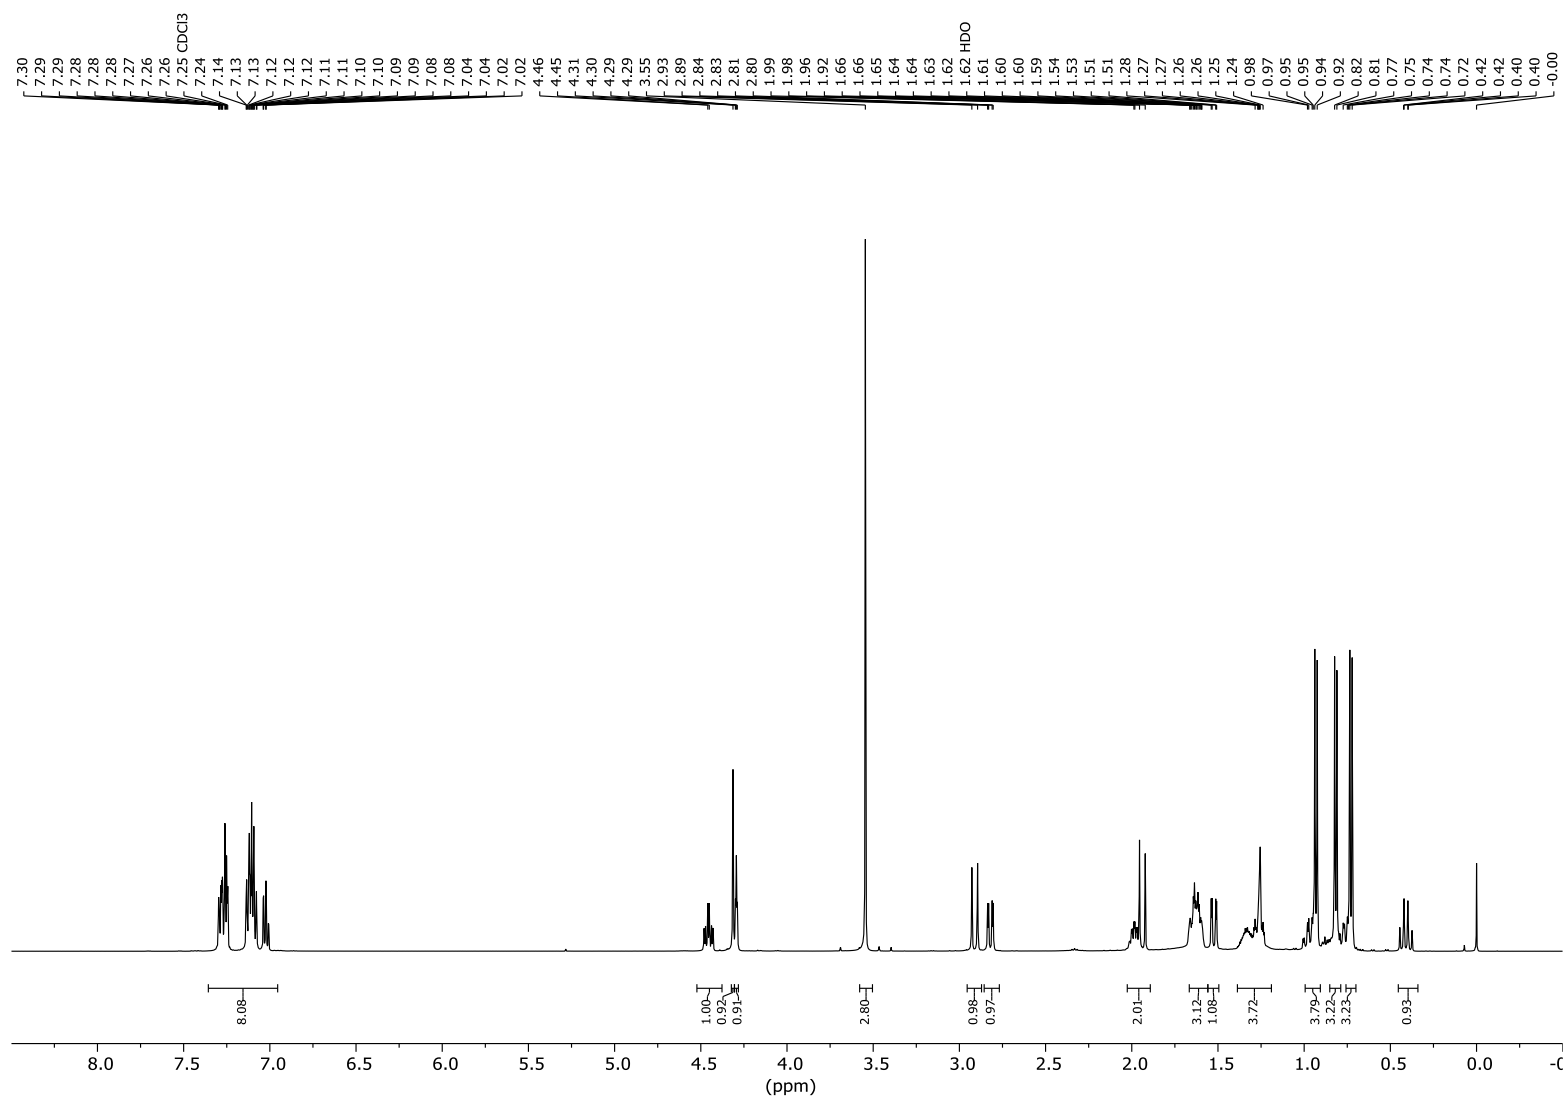

Figure S27 <sup>1</sup>H NMR (500 MHz, CDCl<sub>3</sub>) spectrum of (-)-(11*S*,1'*S*)-**15**

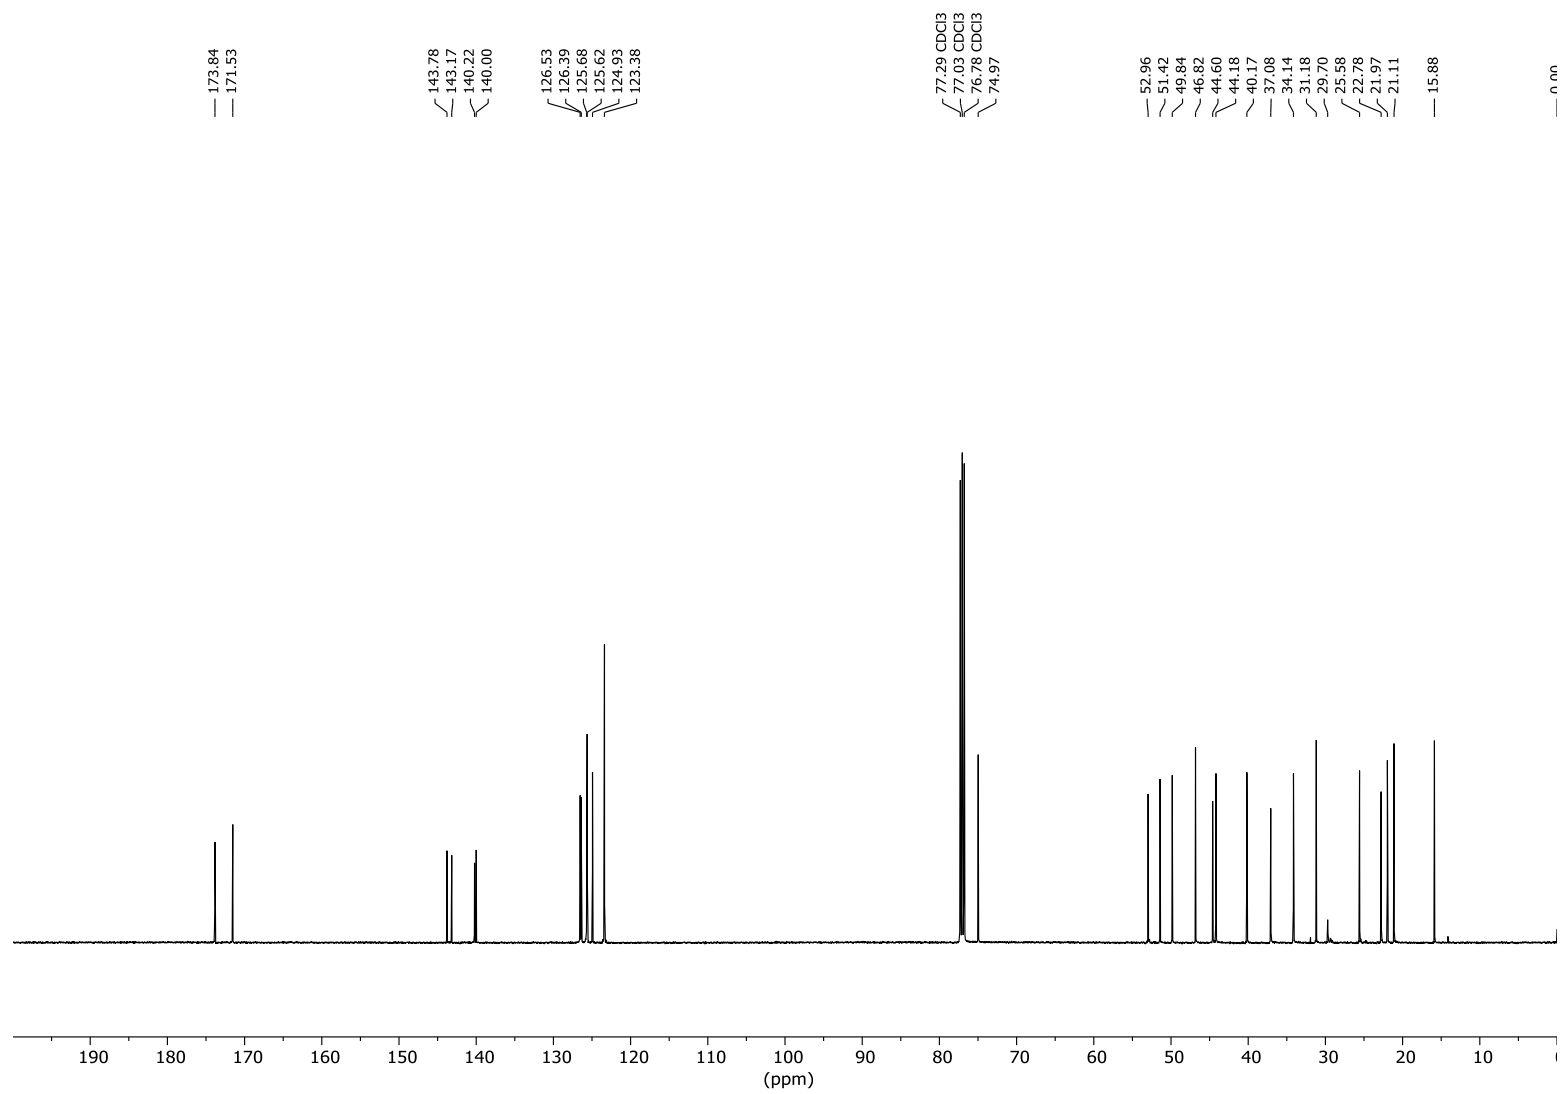

Figure S28 <sup>13</sup>C NMR (126 MHz, CDCl<sub>3</sub>) spectrum of (-)-(11*S*,1'*S*)-15

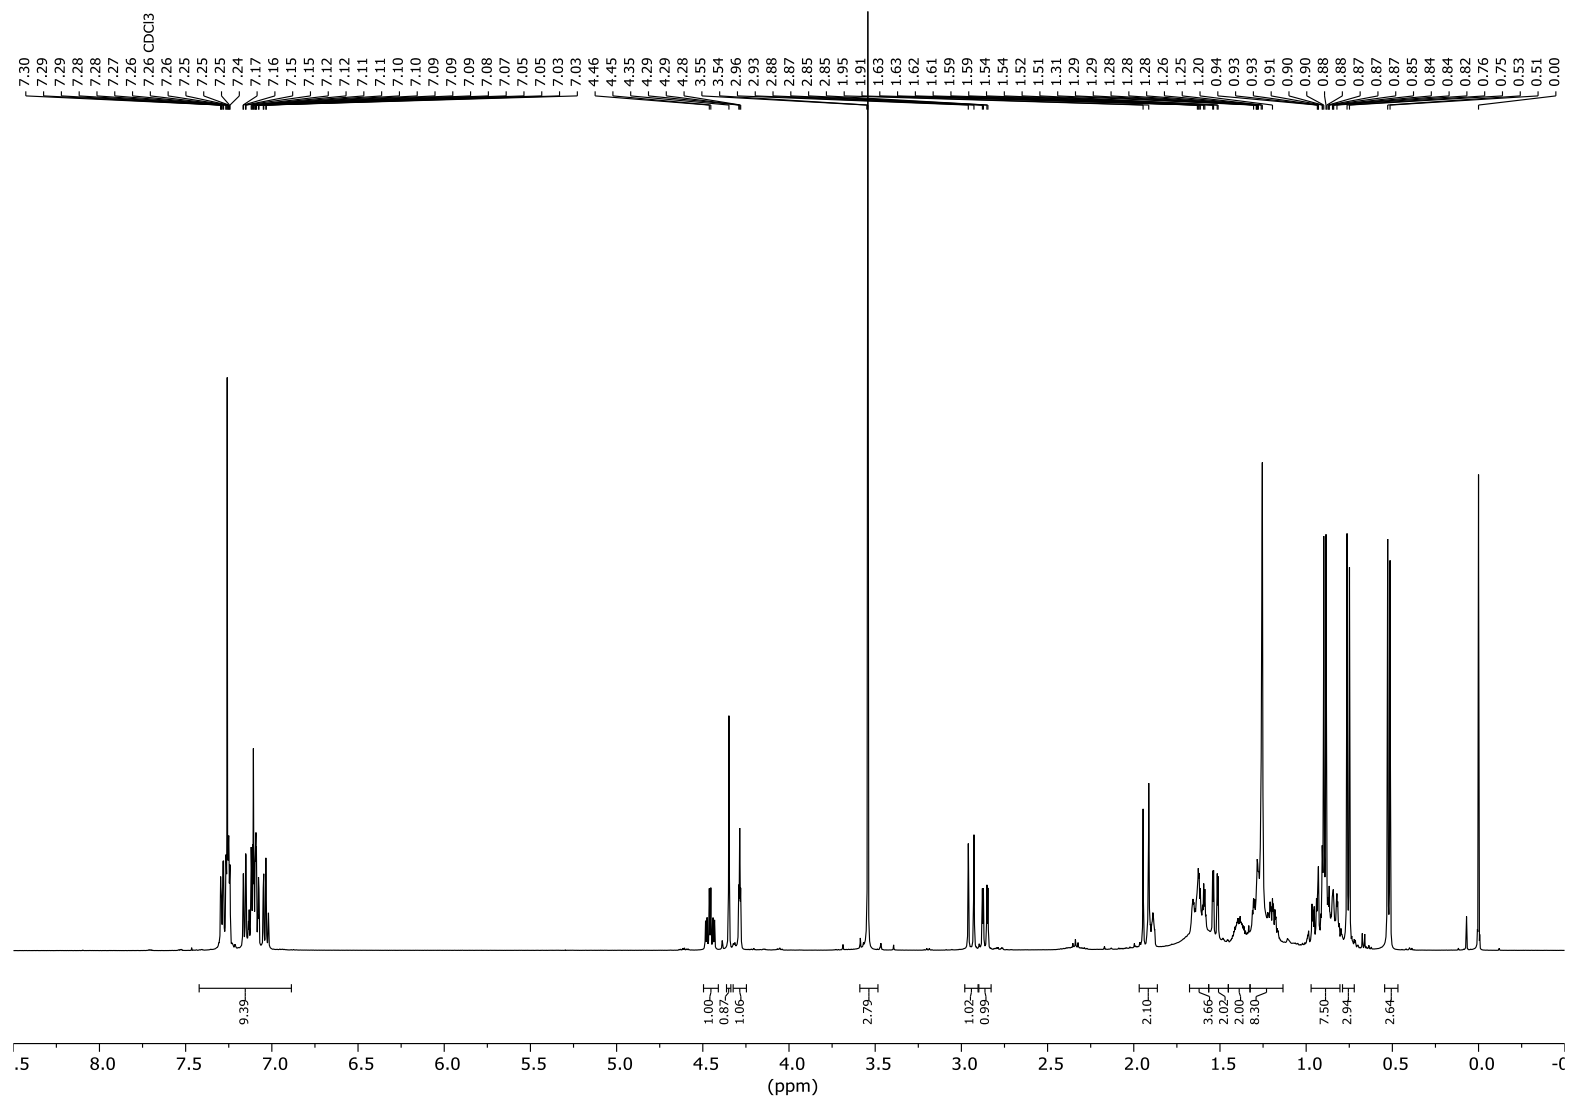

Figure S29 <sup>1</sup>H NMR (500 MHz, CDCl<sub>3</sub>) spectrum of (-)-(11R,1'S)-16

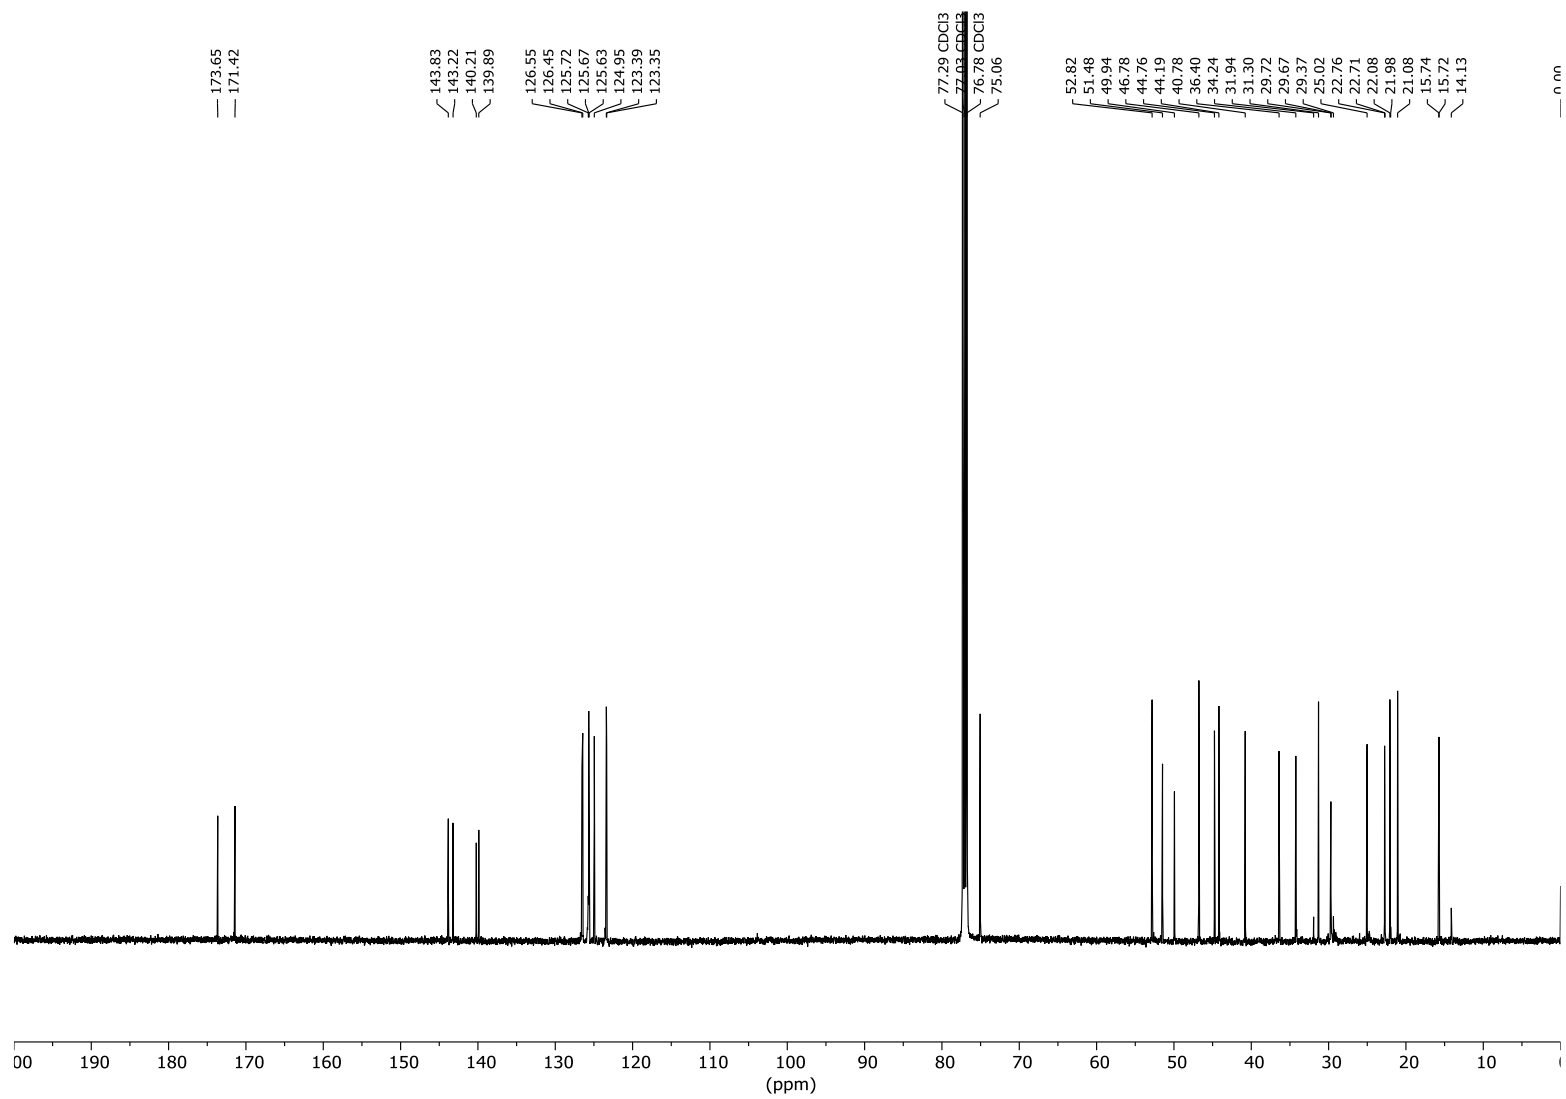

Figure S30 <sup>13</sup>C NMR (126 MHz, CDCl<sub>3</sub>) spectrum of (-)-(11*R*,1'*S*)-16

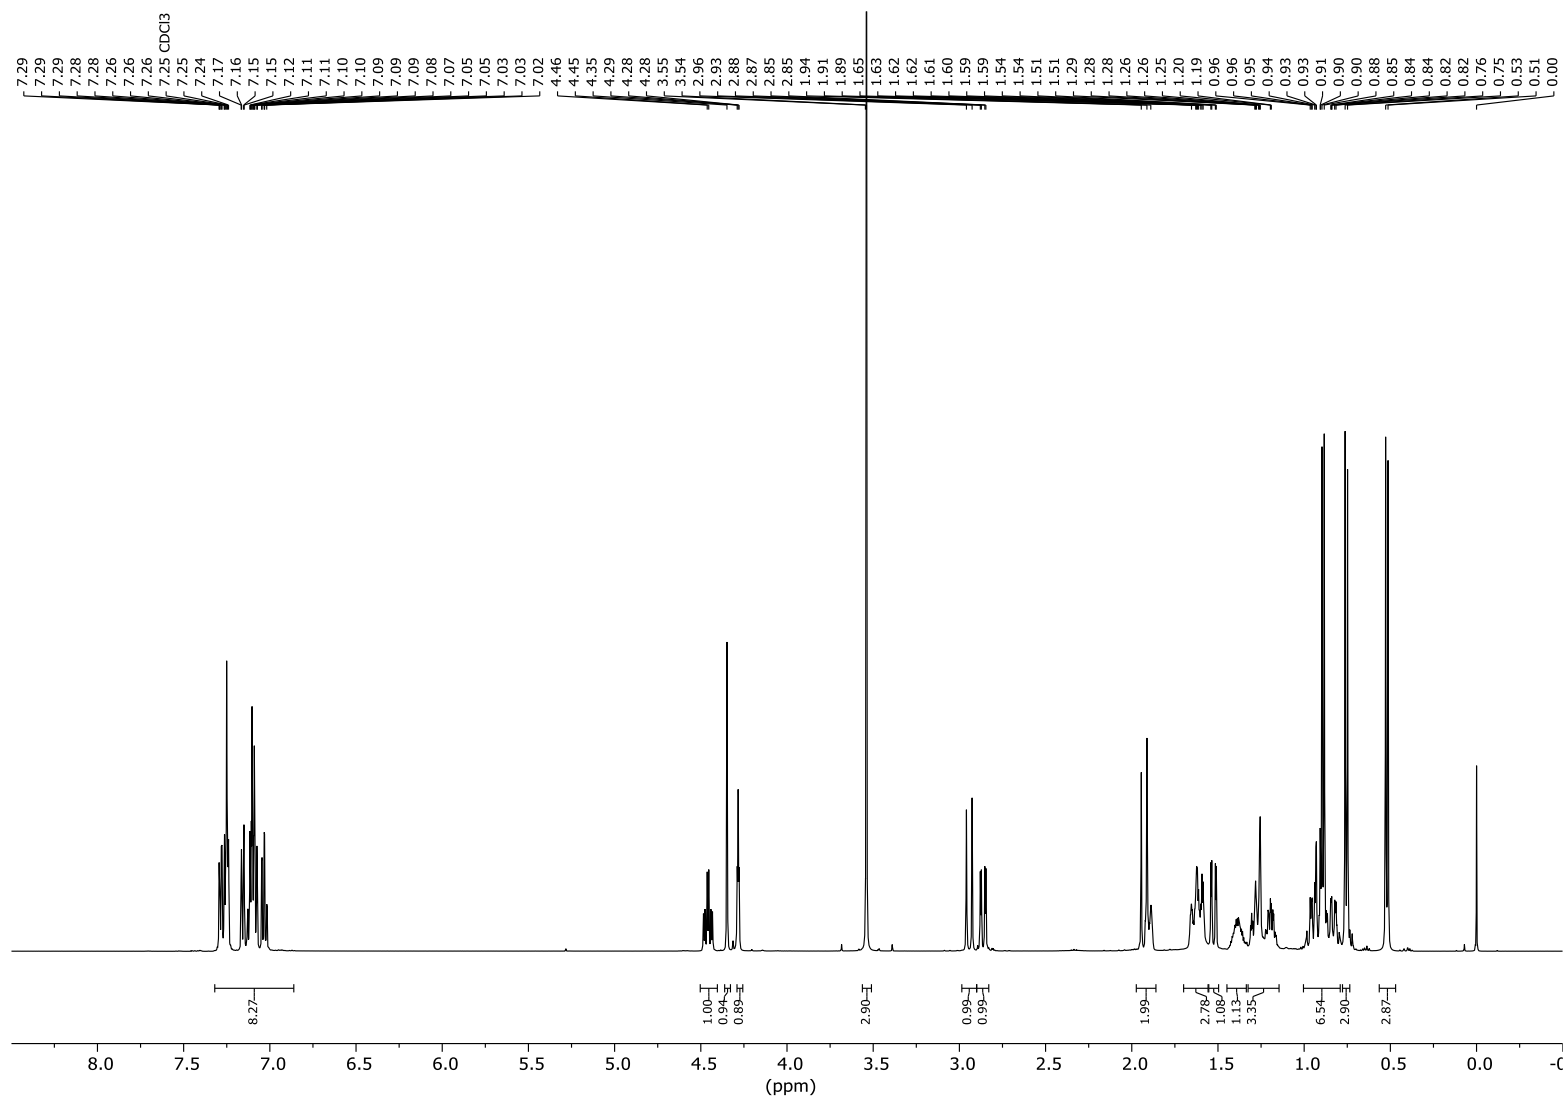

Figure S31 <sup>1</sup>H NMR (500 MHz, CDCl<sub>3</sub>) spectrum of (+)-(11*S*,1'*R*)-**17**



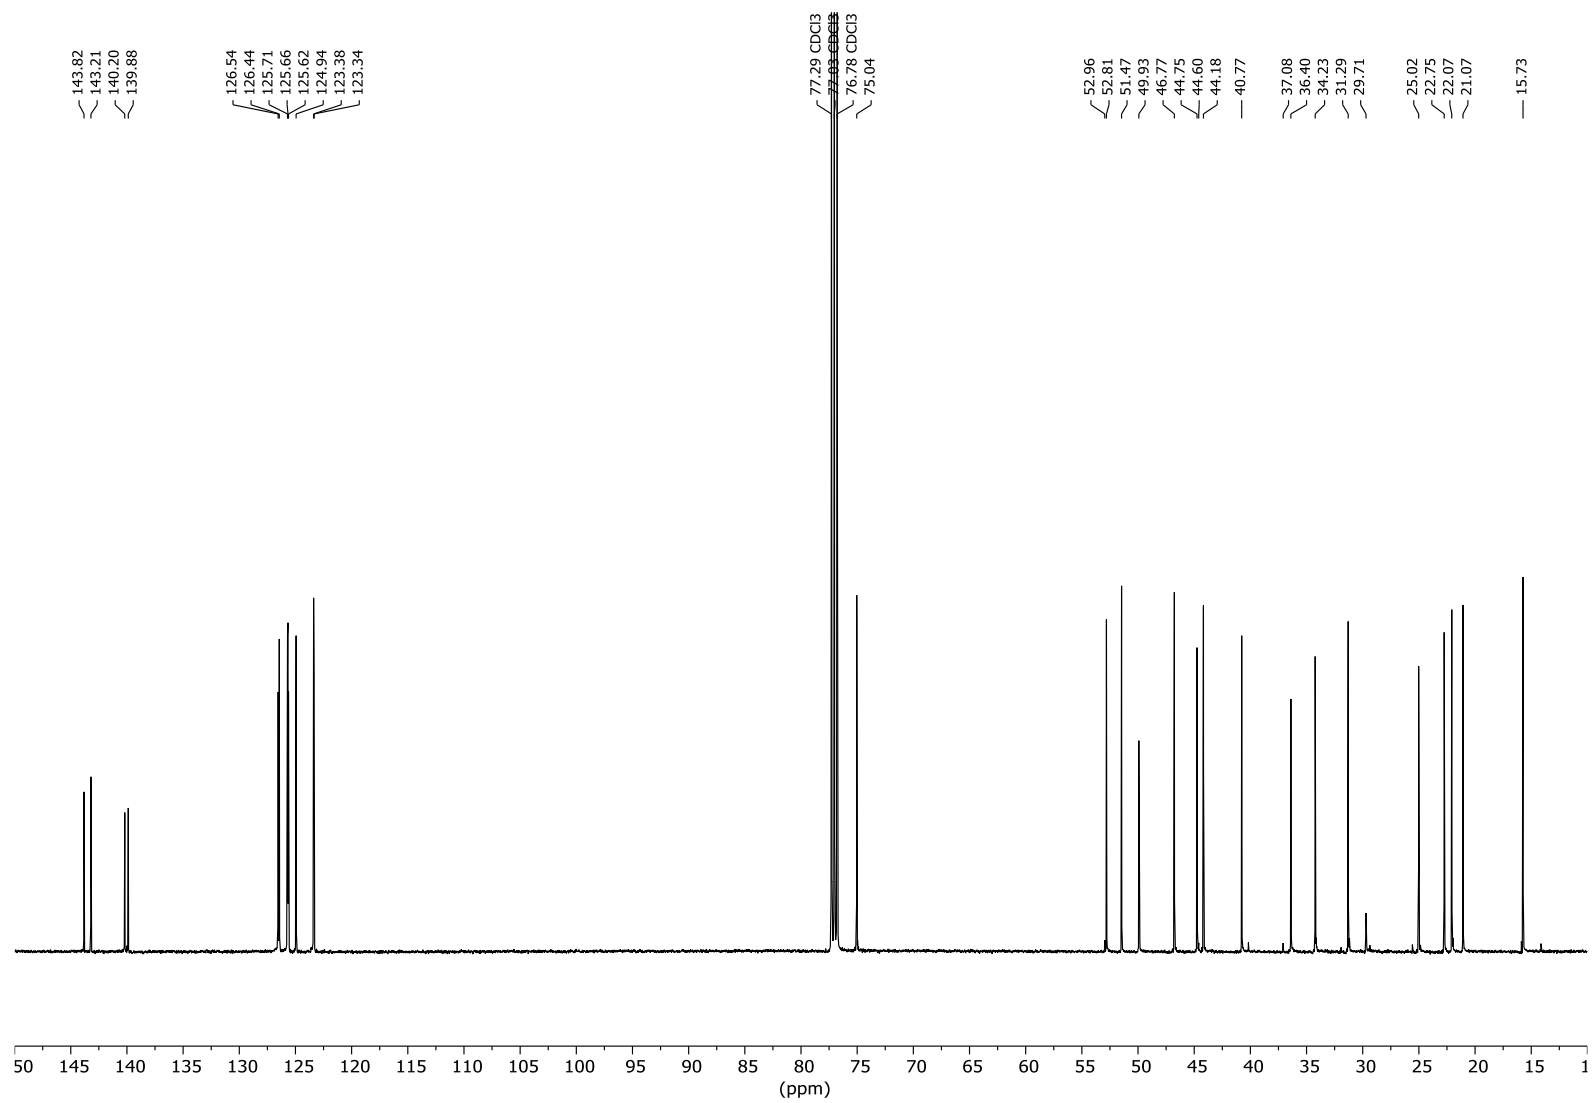

Figure S32  $^{13}\text{C}$  NMR (126 MHz,  $\text{CDCl}_3$ ) spectrum of (+)-(11*S*,1'*R*)-17

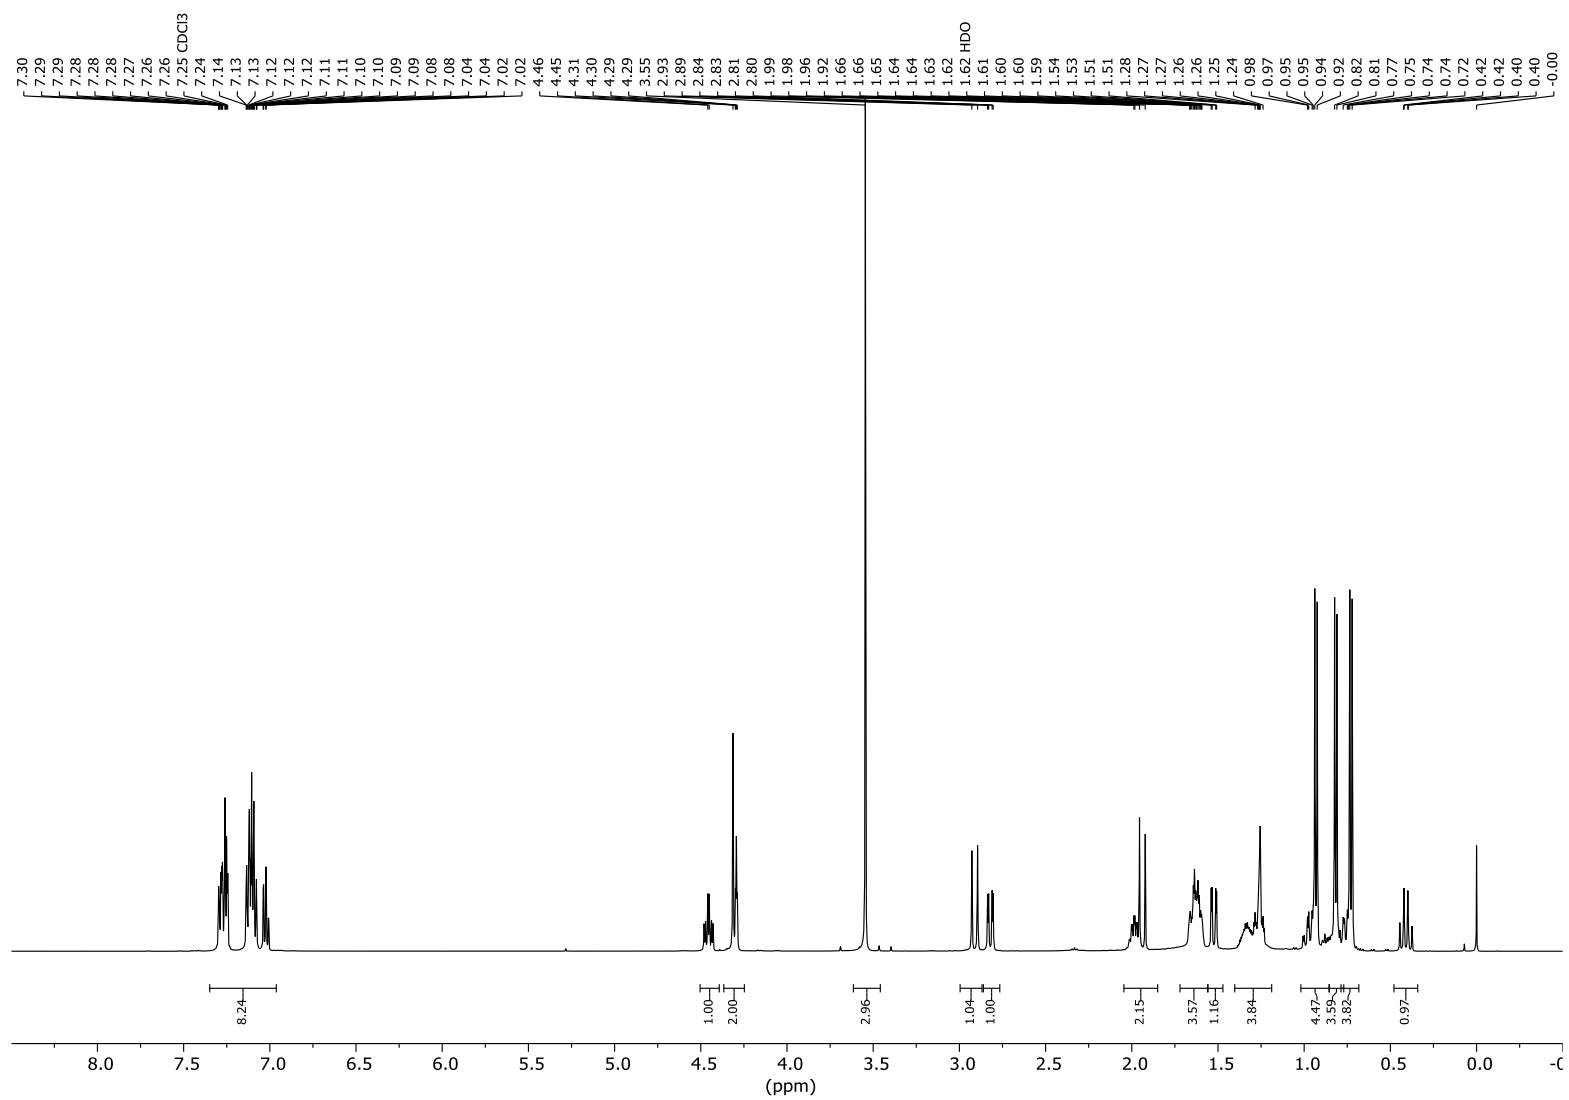

Figure S33 <sup>1</sup>H NMR (500 MHz, CDCl<sub>3</sub>) spectrum of (+)-(11*R*,1'*R*)-**18**

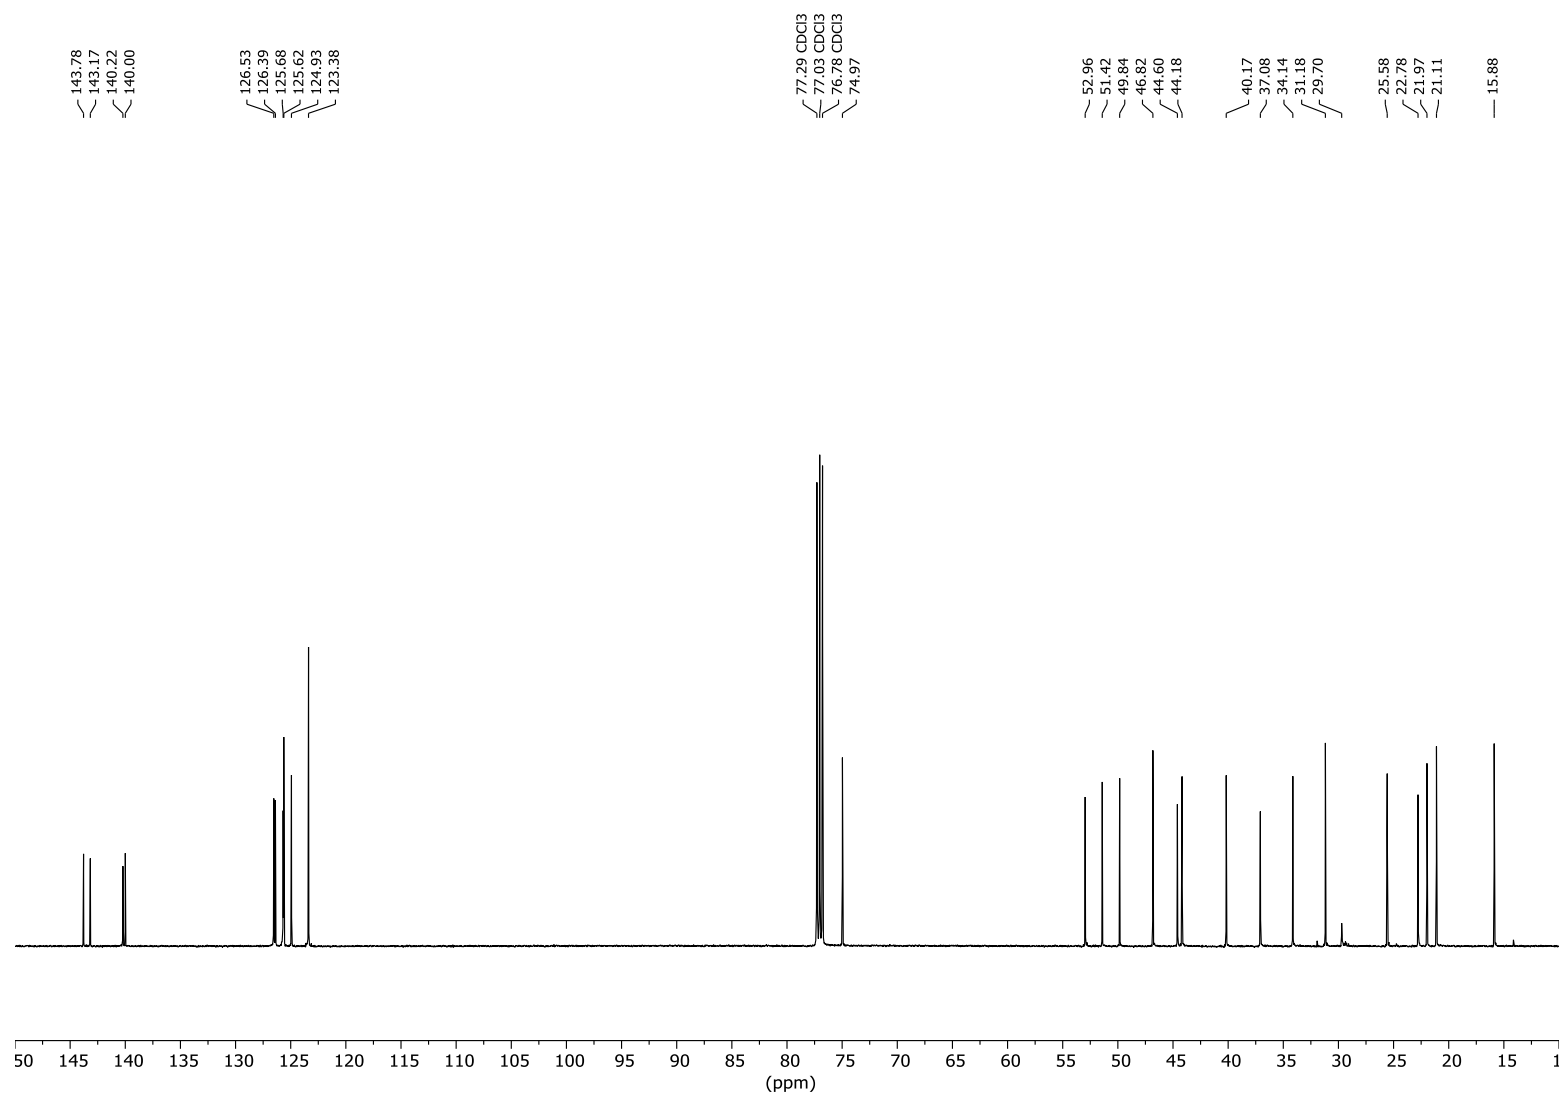

Figure S34 <sup>13</sup>C NMR (126 MHz, CDCl<sub>3</sub>) spectrum of (+)-(11*R*,1'*R*)-**18**

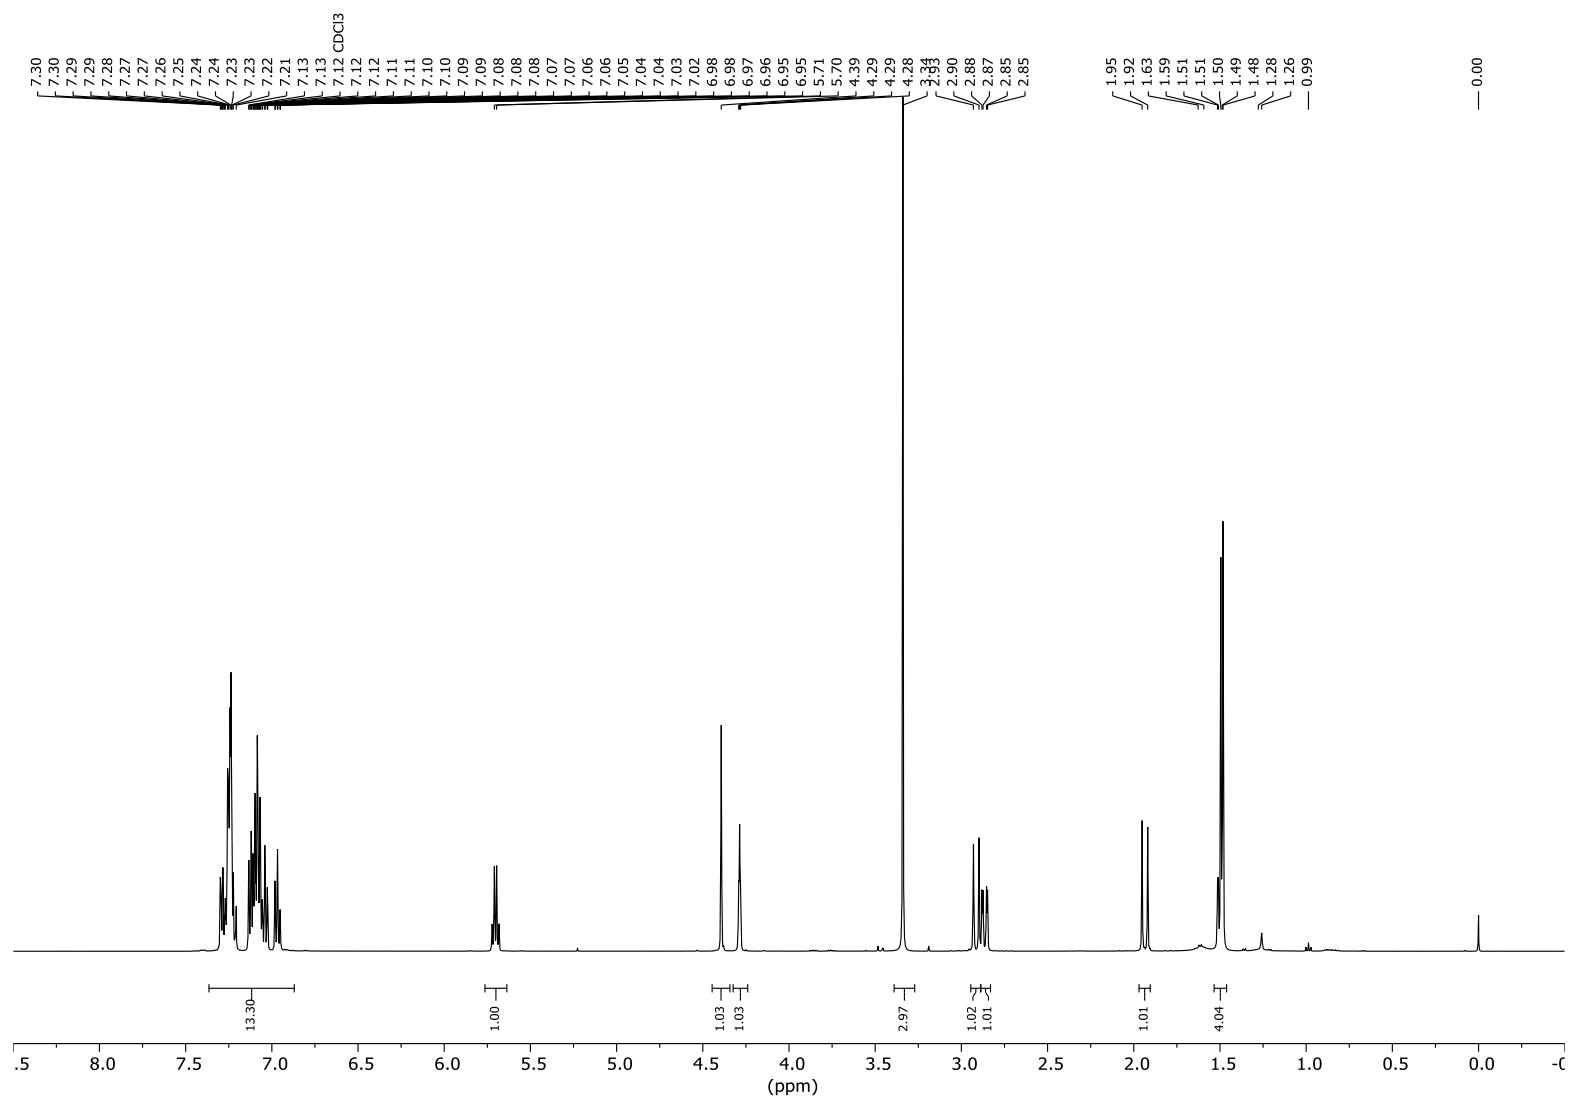

Figure S35 <sup>1</sup>H NMR (500 MHz, CDCl<sub>3</sub>) spectrum of (+)-(11*S*,1'*S*)-**19**

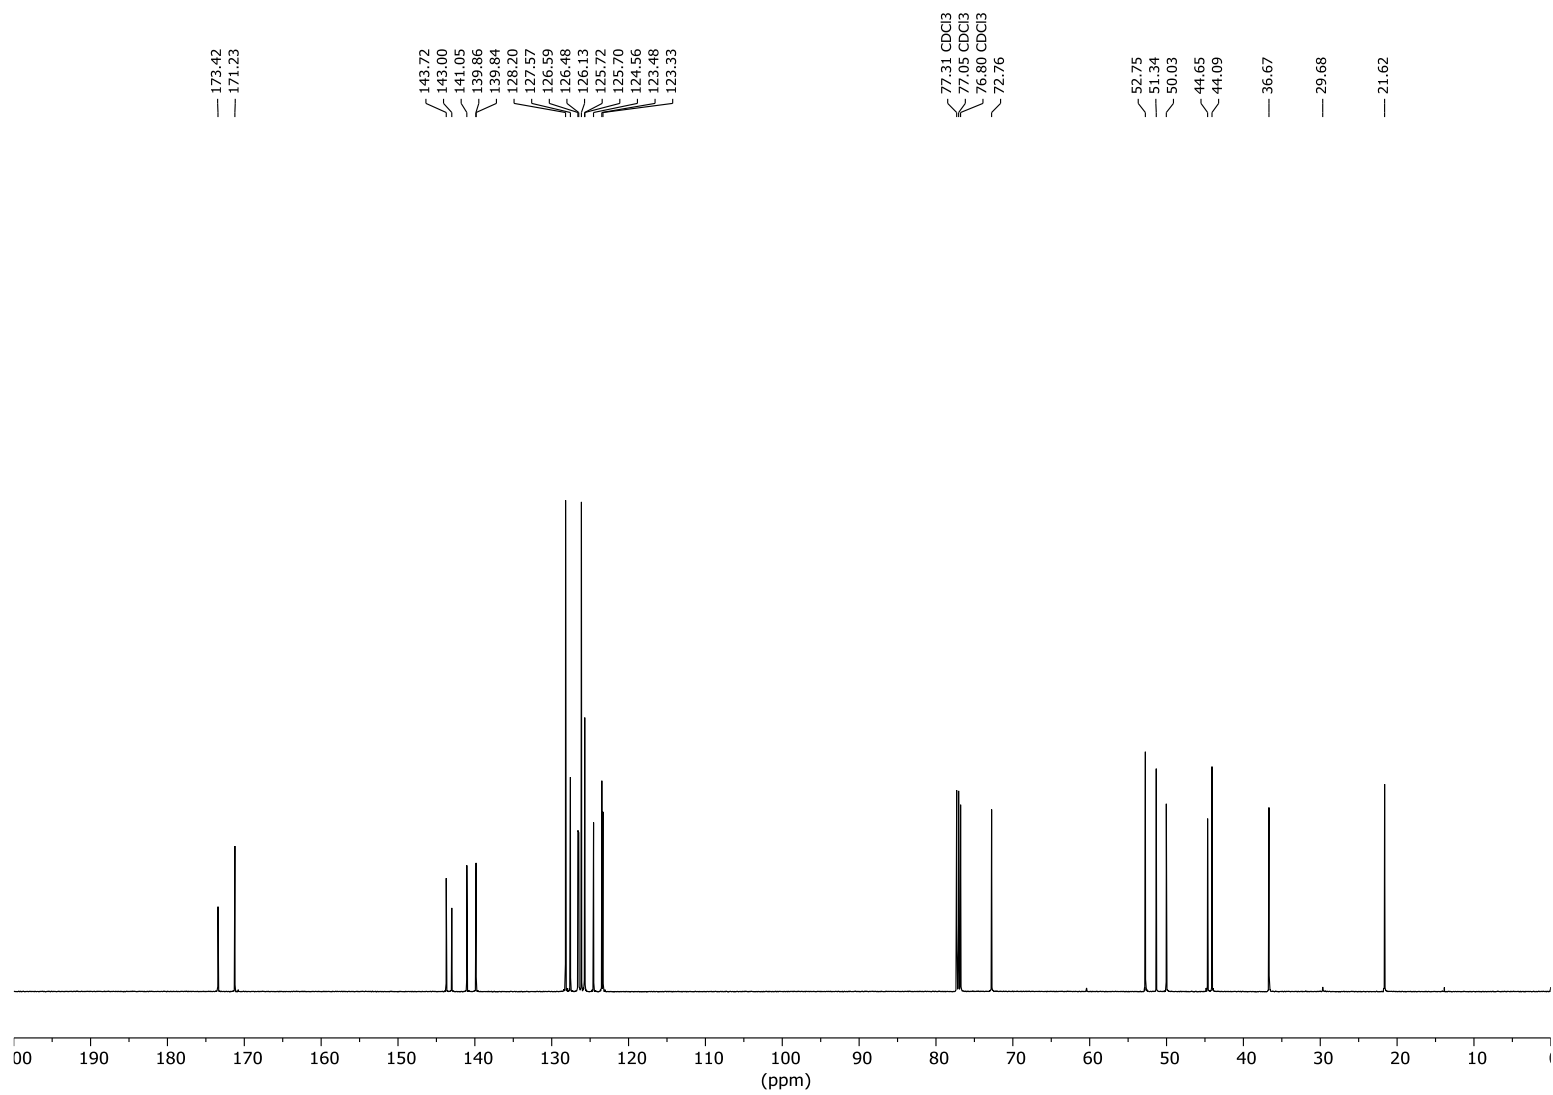

Figure S36 <sup>13</sup>C NMR (126 MHz, CDCl<sub>3</sub>) spectrum of (+)-(11*S*,1'*S*)-19

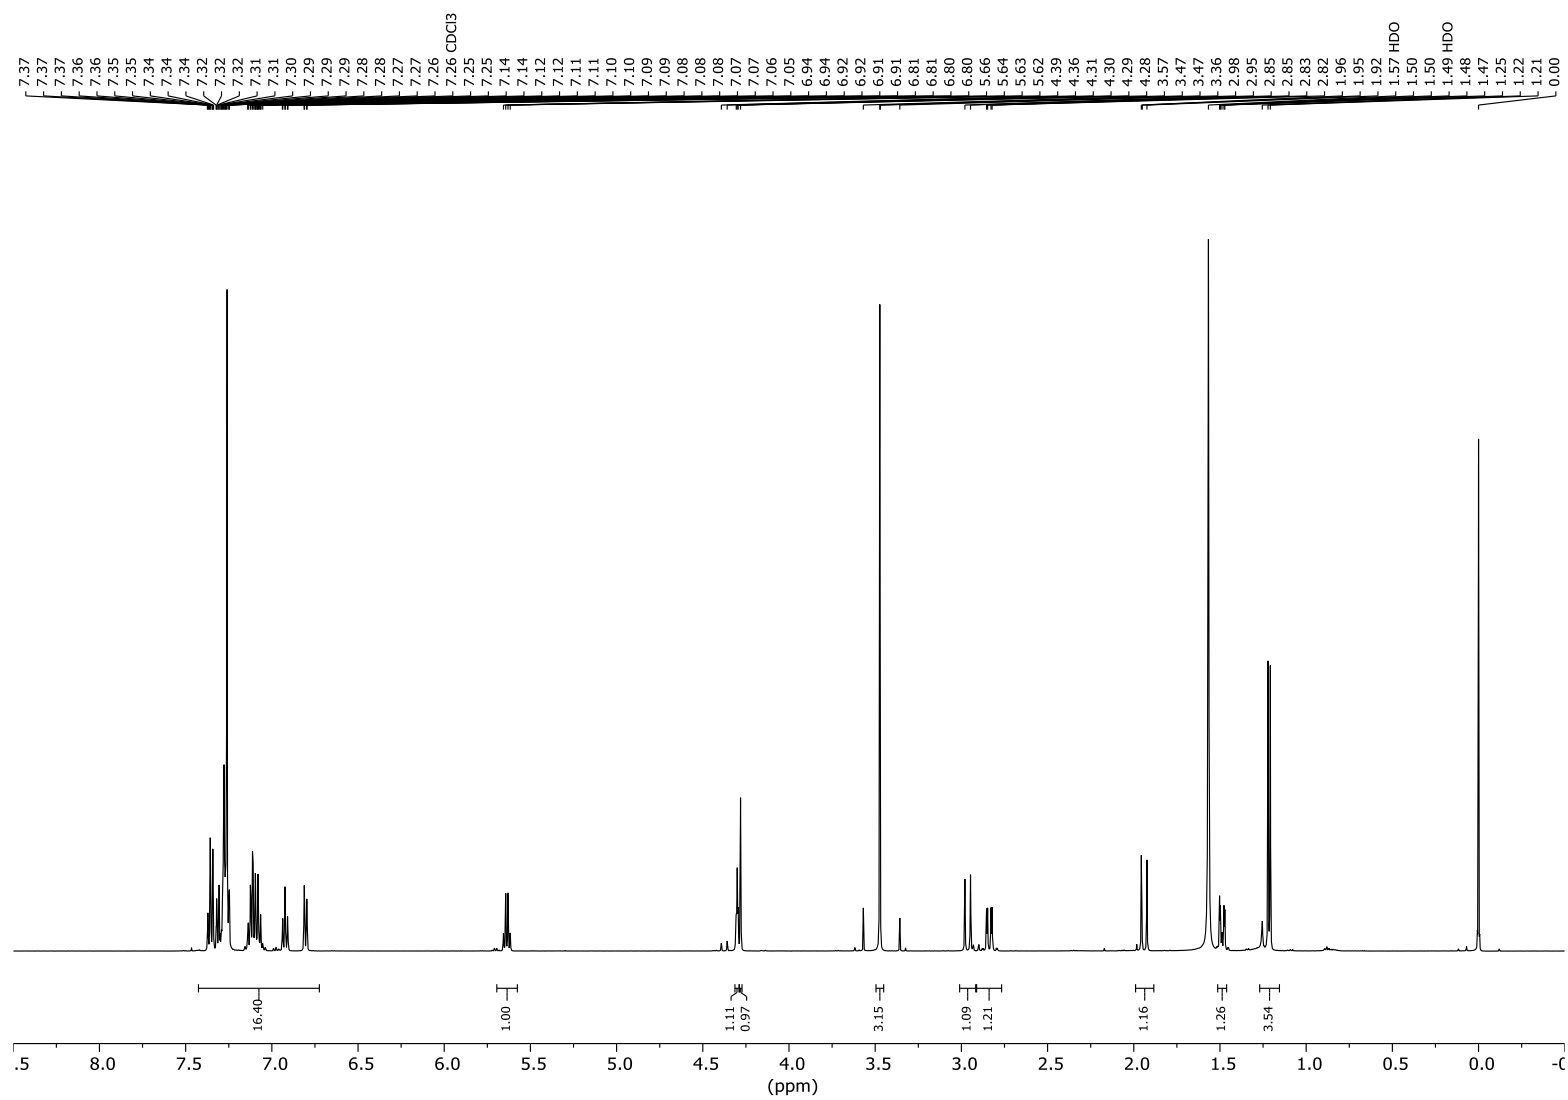

Figure S37 <sup>1</sup>H NMR (500 MHz, CDCl<sub>3</sub>) spectrum of (-)-(11*R*,1'*S*)-**20**

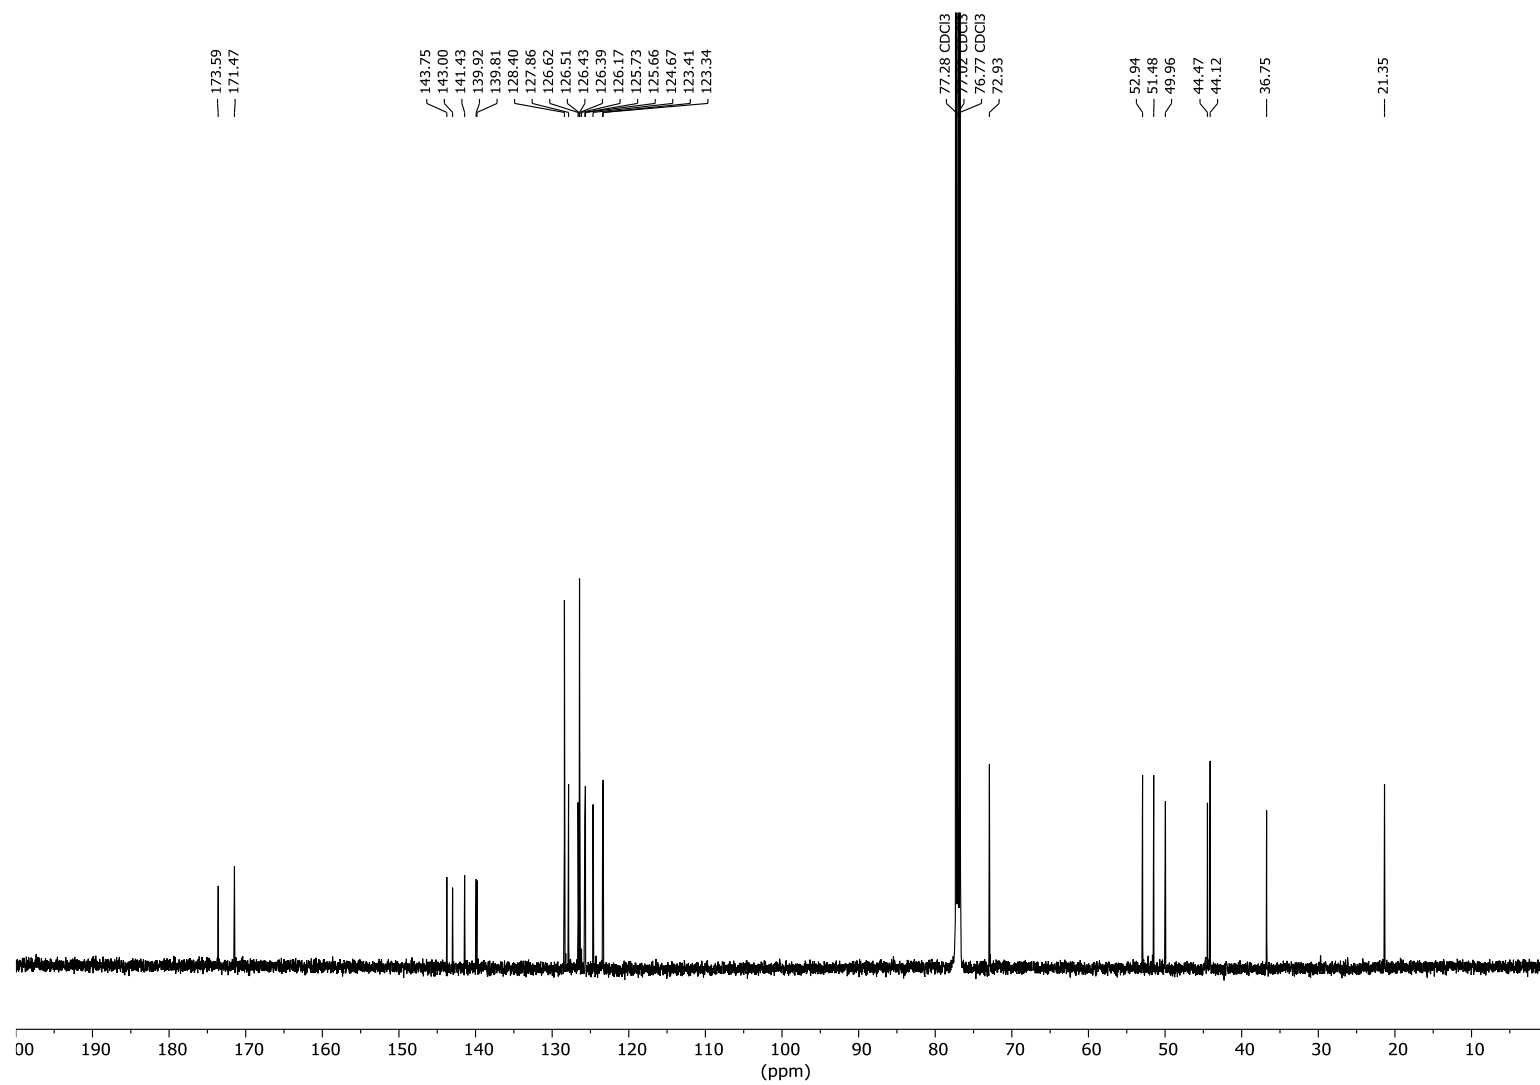

Figure S38 <sup>13</sup>C NMR (126 MHz, CDCl<sub>3</sub>) spectrum of (-)-(11R,1'S)-20

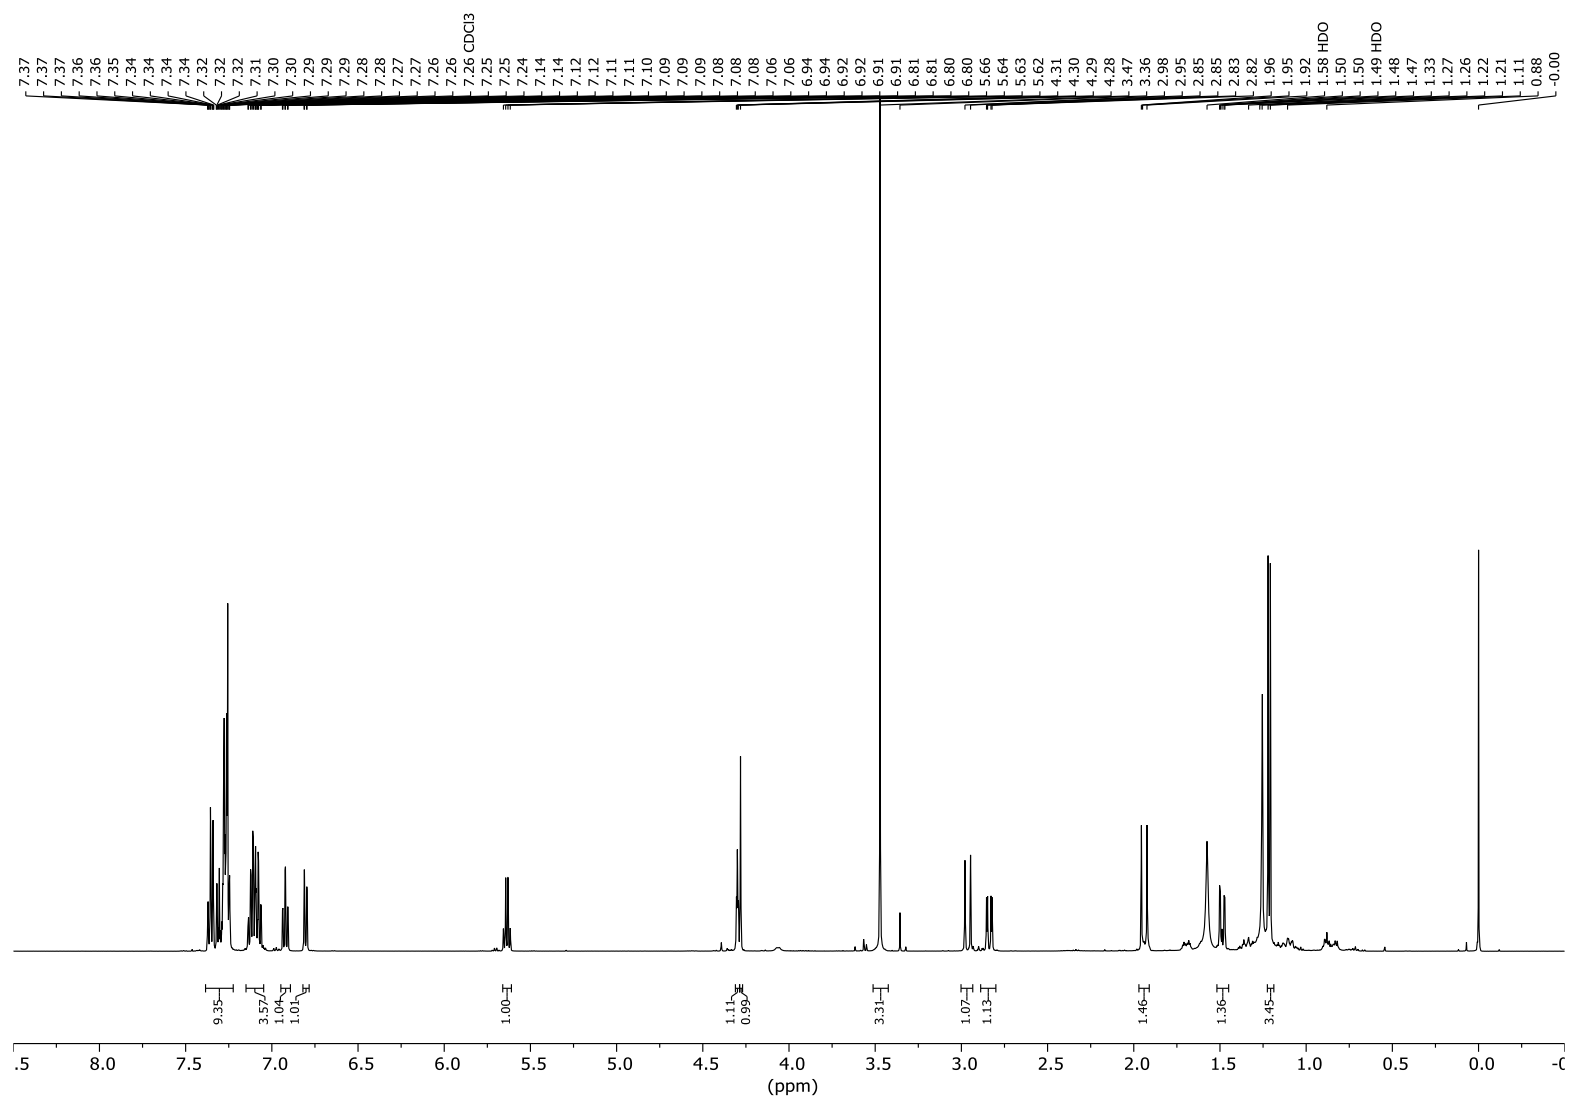

Figure S39 <sup>1</sup>H NMR (500 MHz, CDCl<sub>3</sub>) spectrum of (-)-(11*S*,1'*R*)-**21**



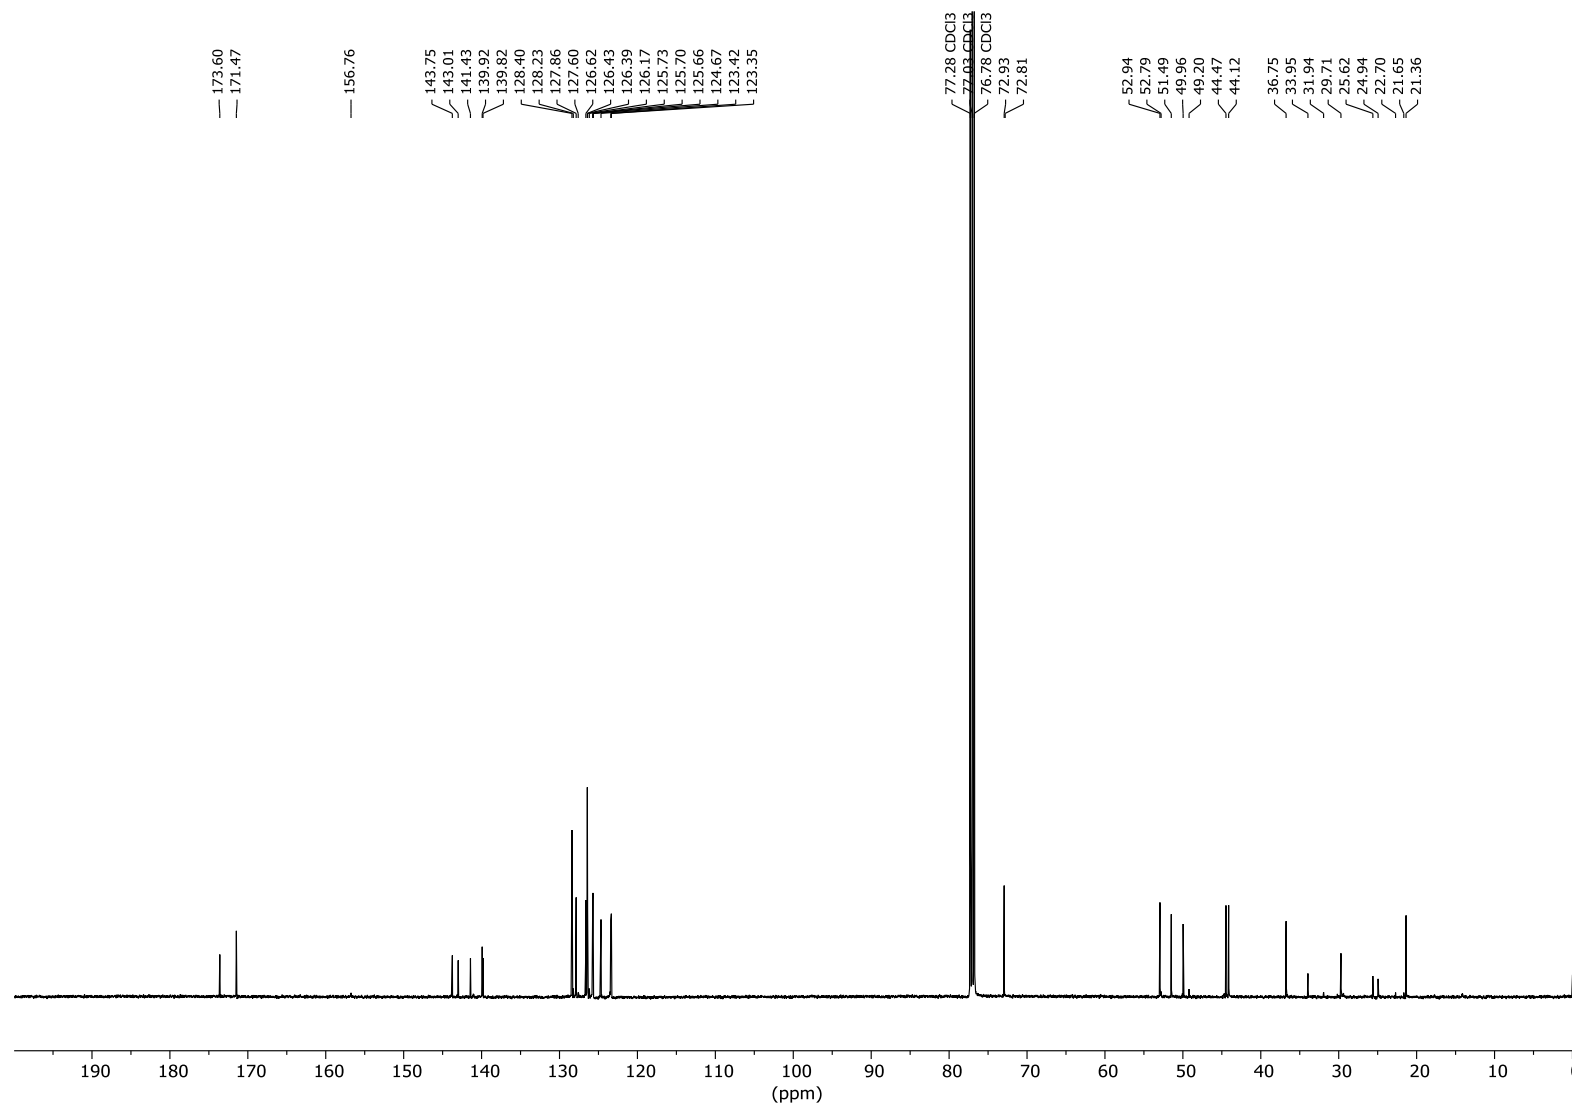

Figure S40 <sup>13</sup>C NMR (126 MHz, CDCl<sub>3</sub>) spectrum of (-)-(11*S*,1'*R*)-**21**

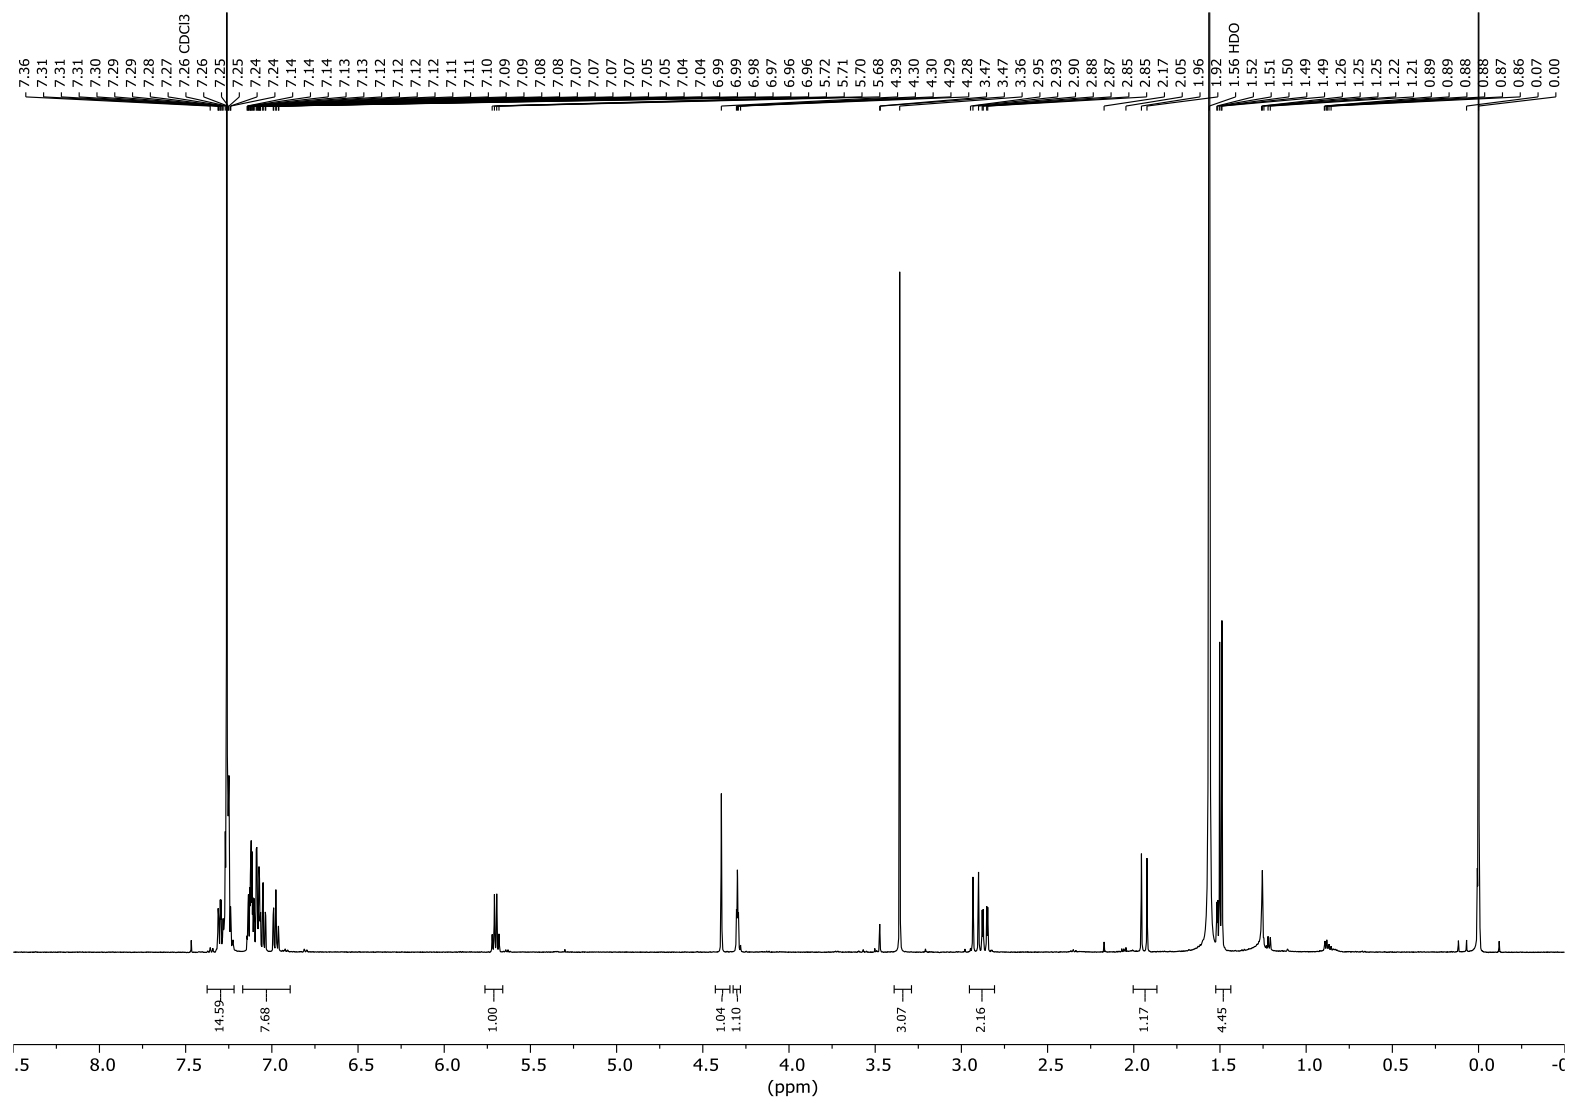

Figure S41  $^1\text{H}$  NMR (500 MHz,  $\text{CDCl}_3$ ) spectrum of  $(-)-(11R,1'R)$ -22

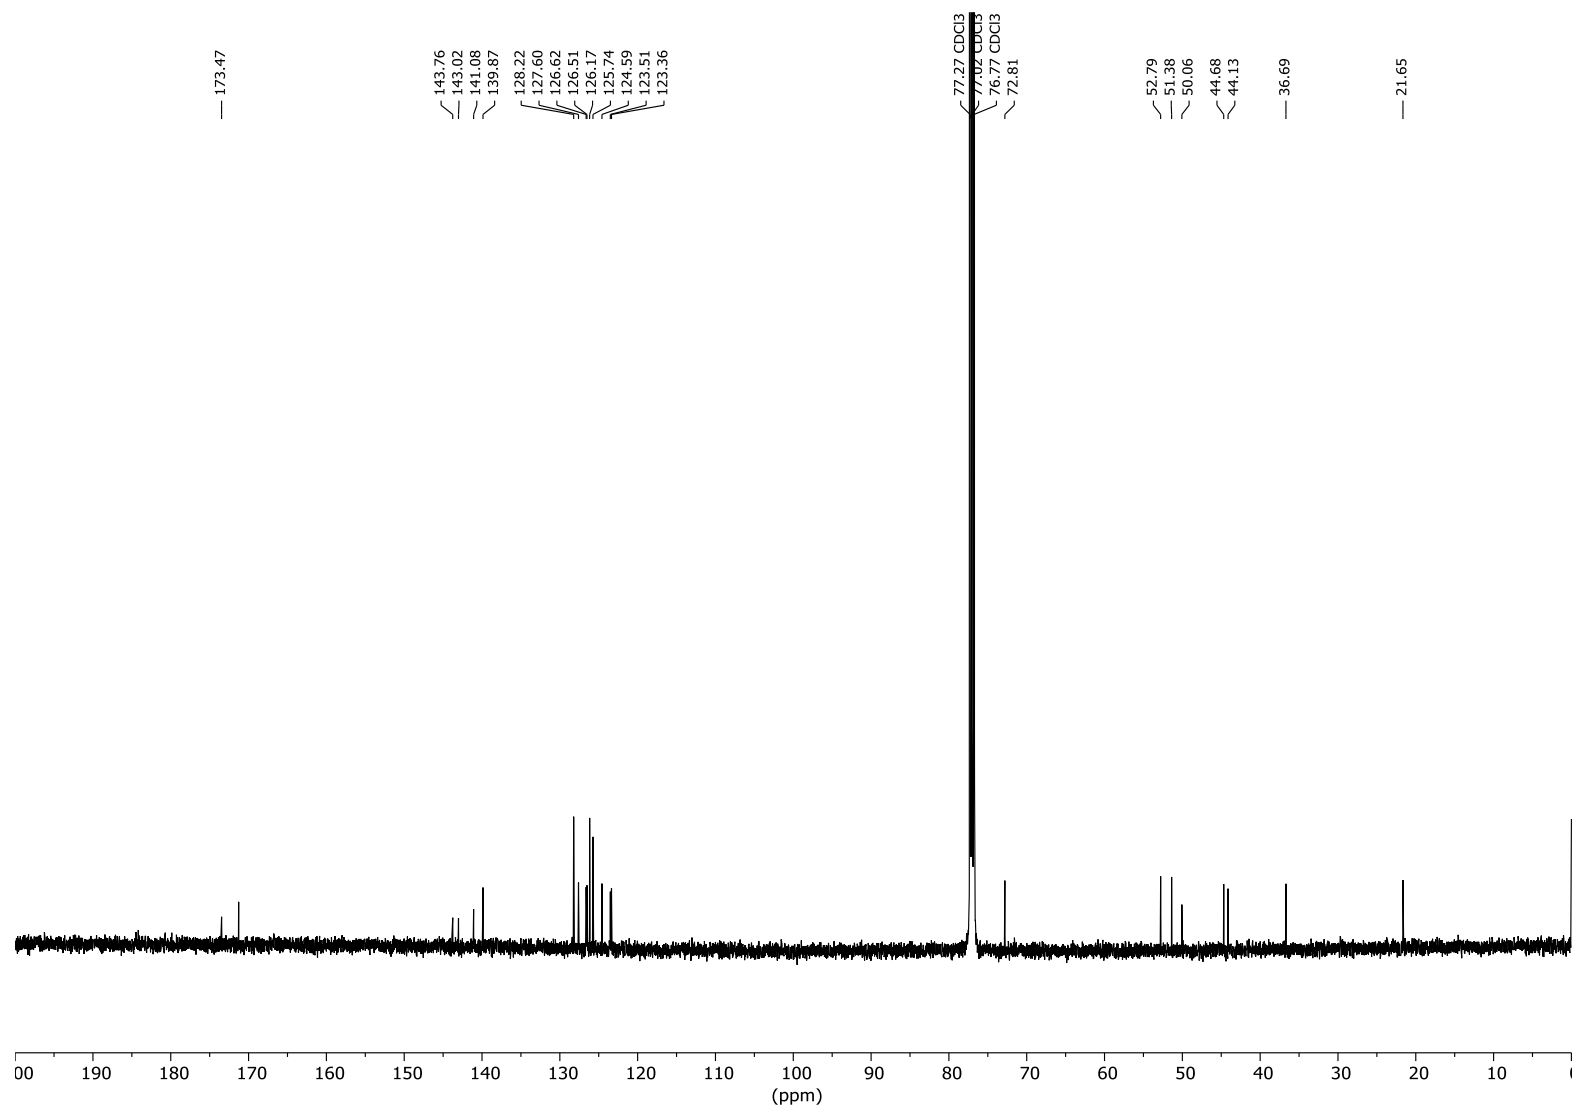

Figure S42 <sup>13</sup>C NMR (126 MHz, CDCl<sub>3</sub>) spectra of (-)-(11*R*,1'*R*)-22

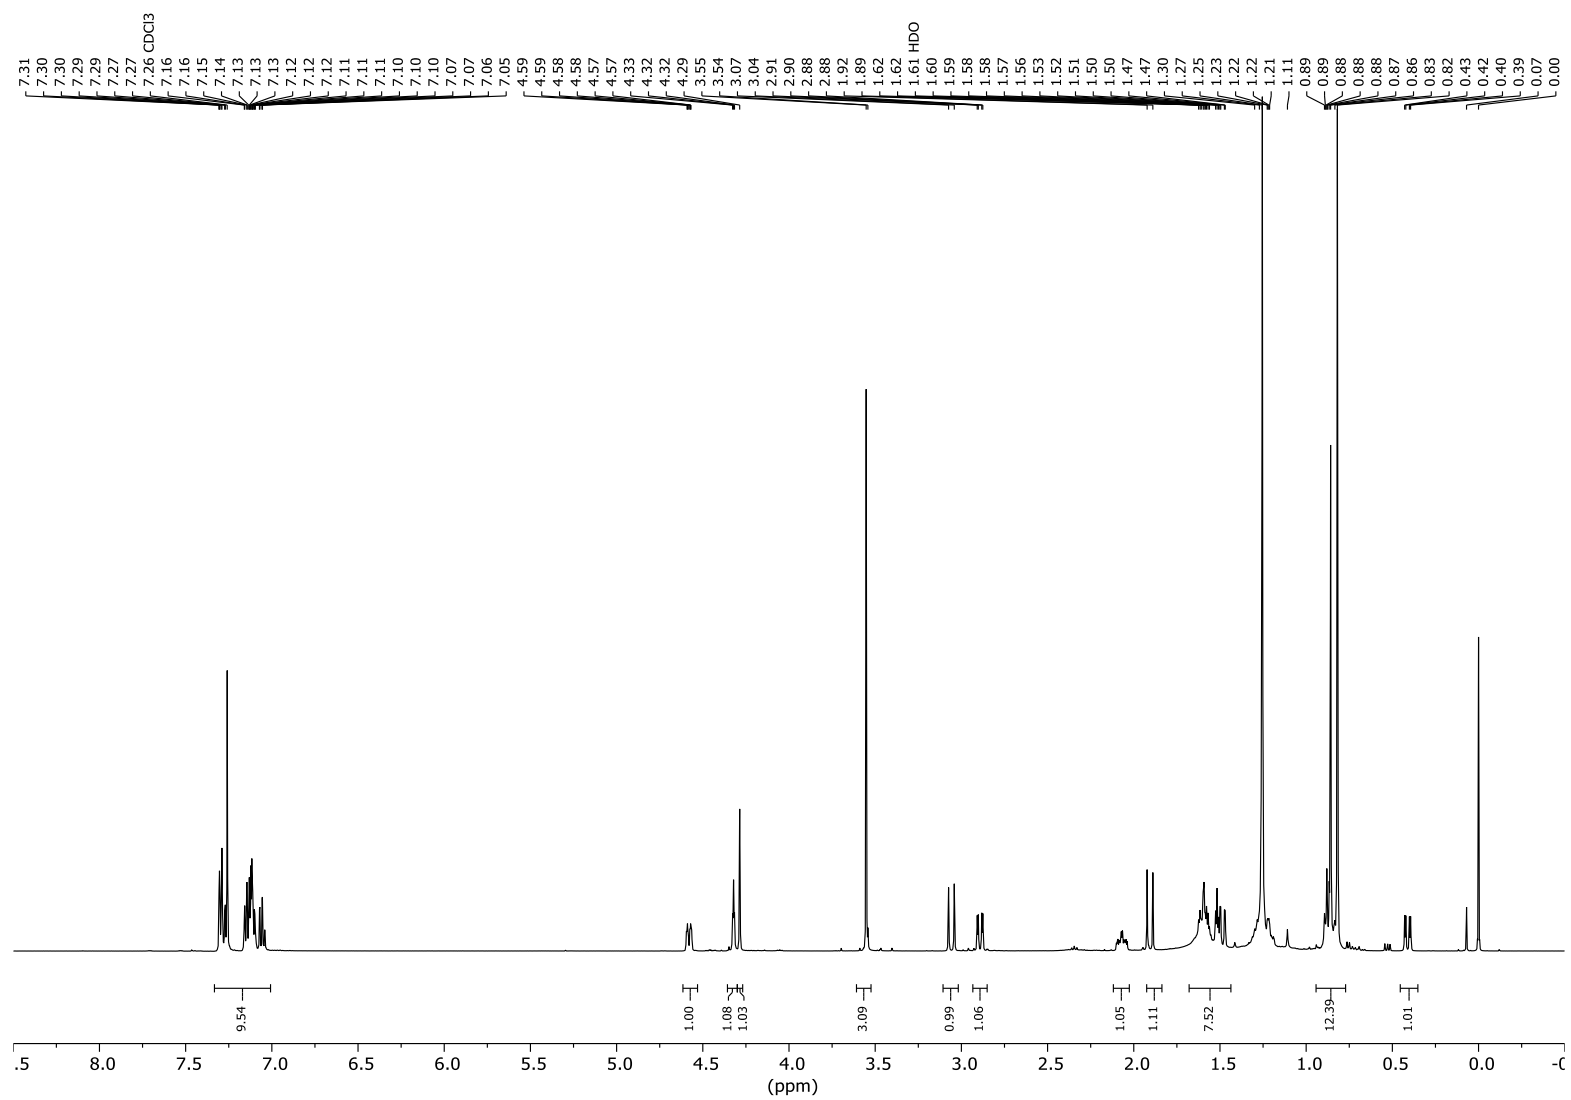

Figure S43 <sup>1</sup>H NMR (500 MHz, CDCl<sub>3</sub>) spectrum of (+)-(11*S*,1'*S*)-**23**

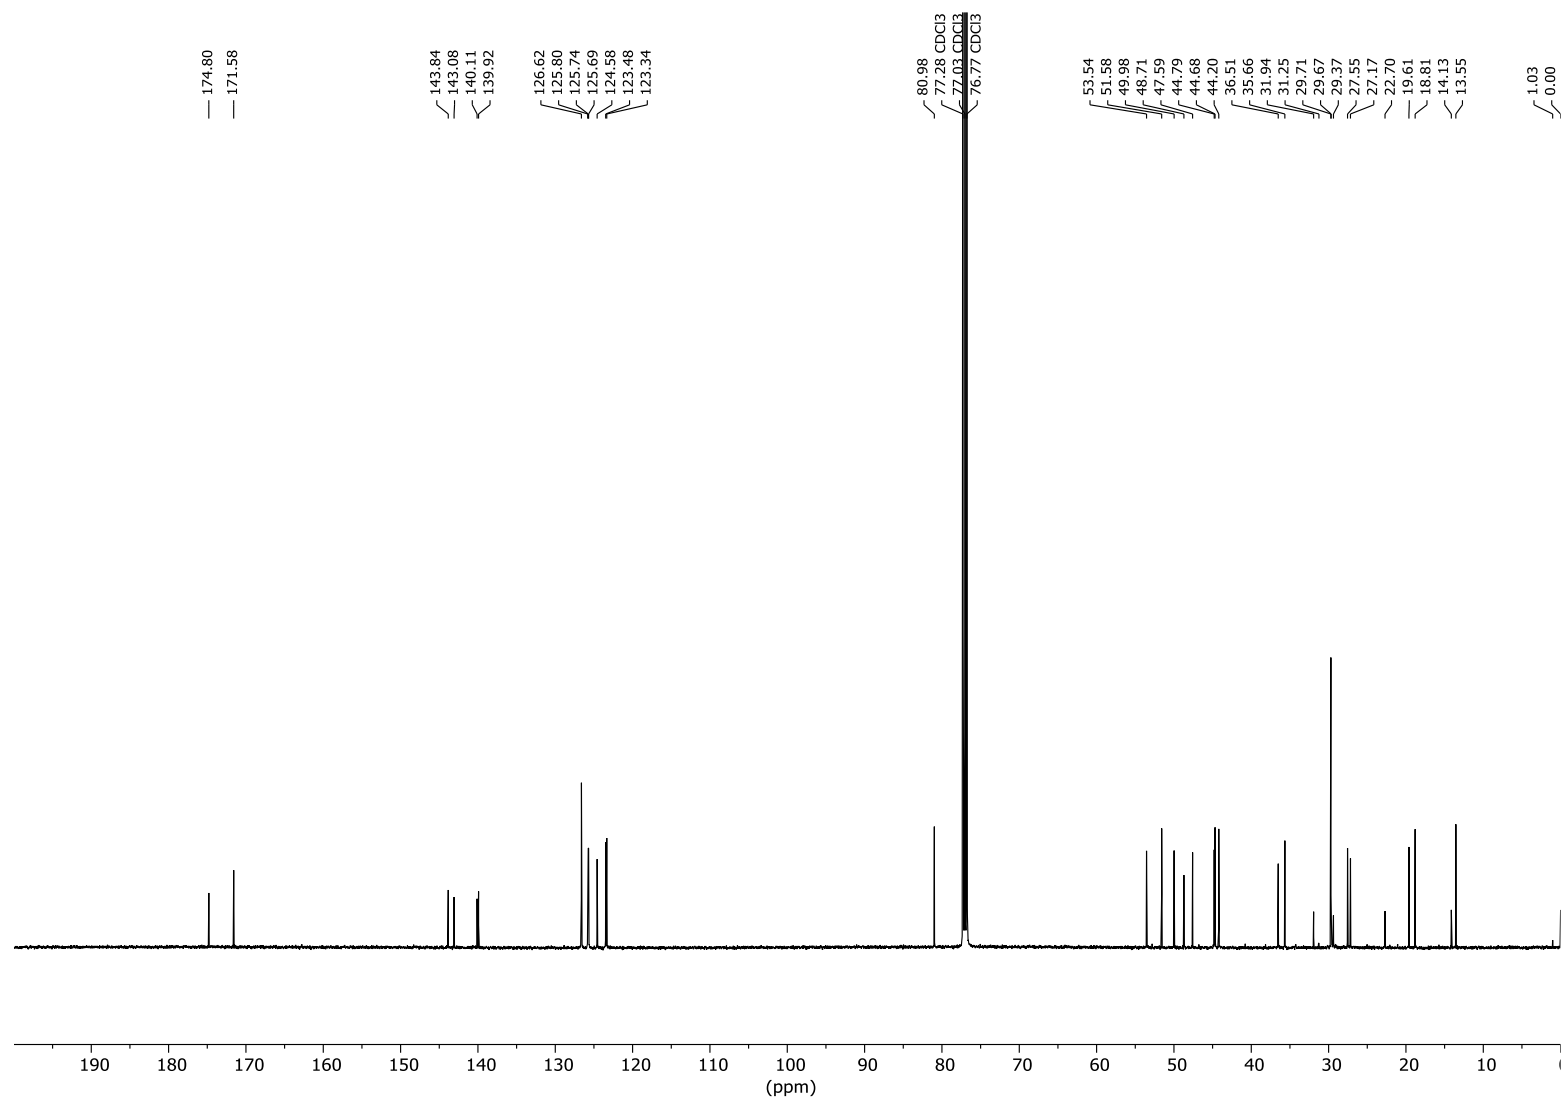

Figure S44 <sup>13</sup>C NMR (126 MHz, CDCl<sub>3</sub>) spectrum of (+)-(11*S*,1'*S*)-23

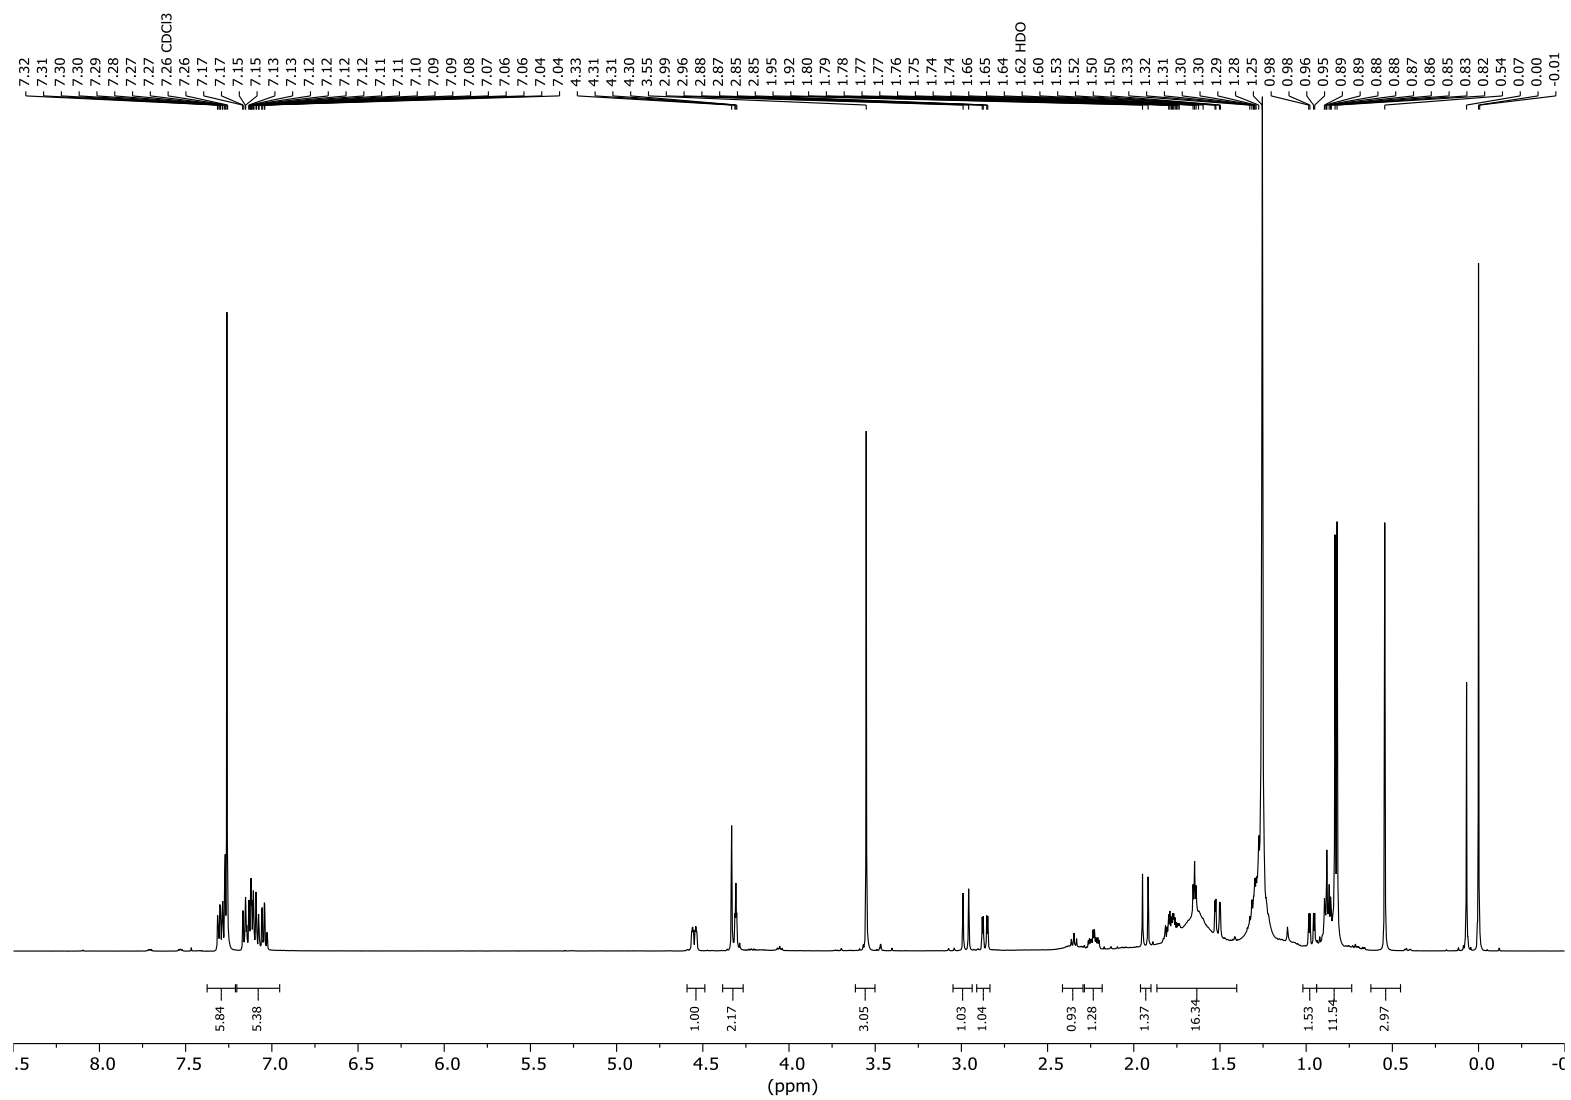

Figure S45 <sup>1</sup>H NMR (500 MHz, CDCl<sub>3</sub>) spectrum of (-)-(11*R*,1'*S*)-**24**

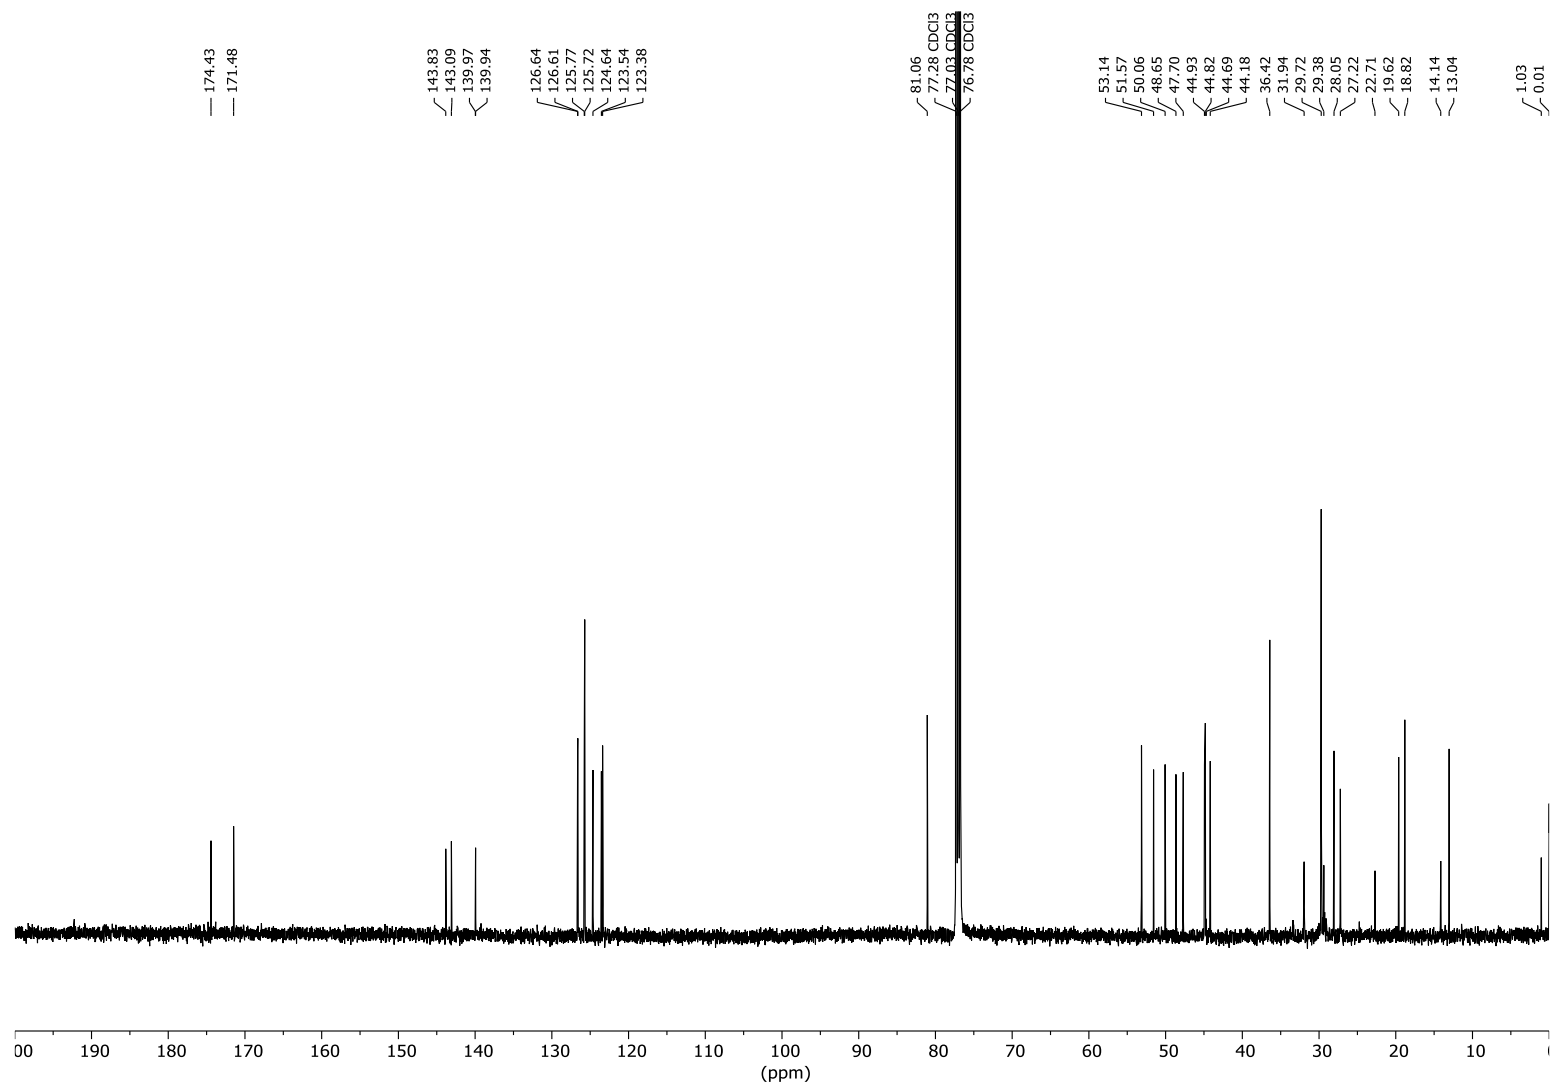

Figure S46 <sup>13</sup>C NMR (126 MHz, CDCl<sub>3</sub>) spectrum of (-)-(11R,1'S)-24

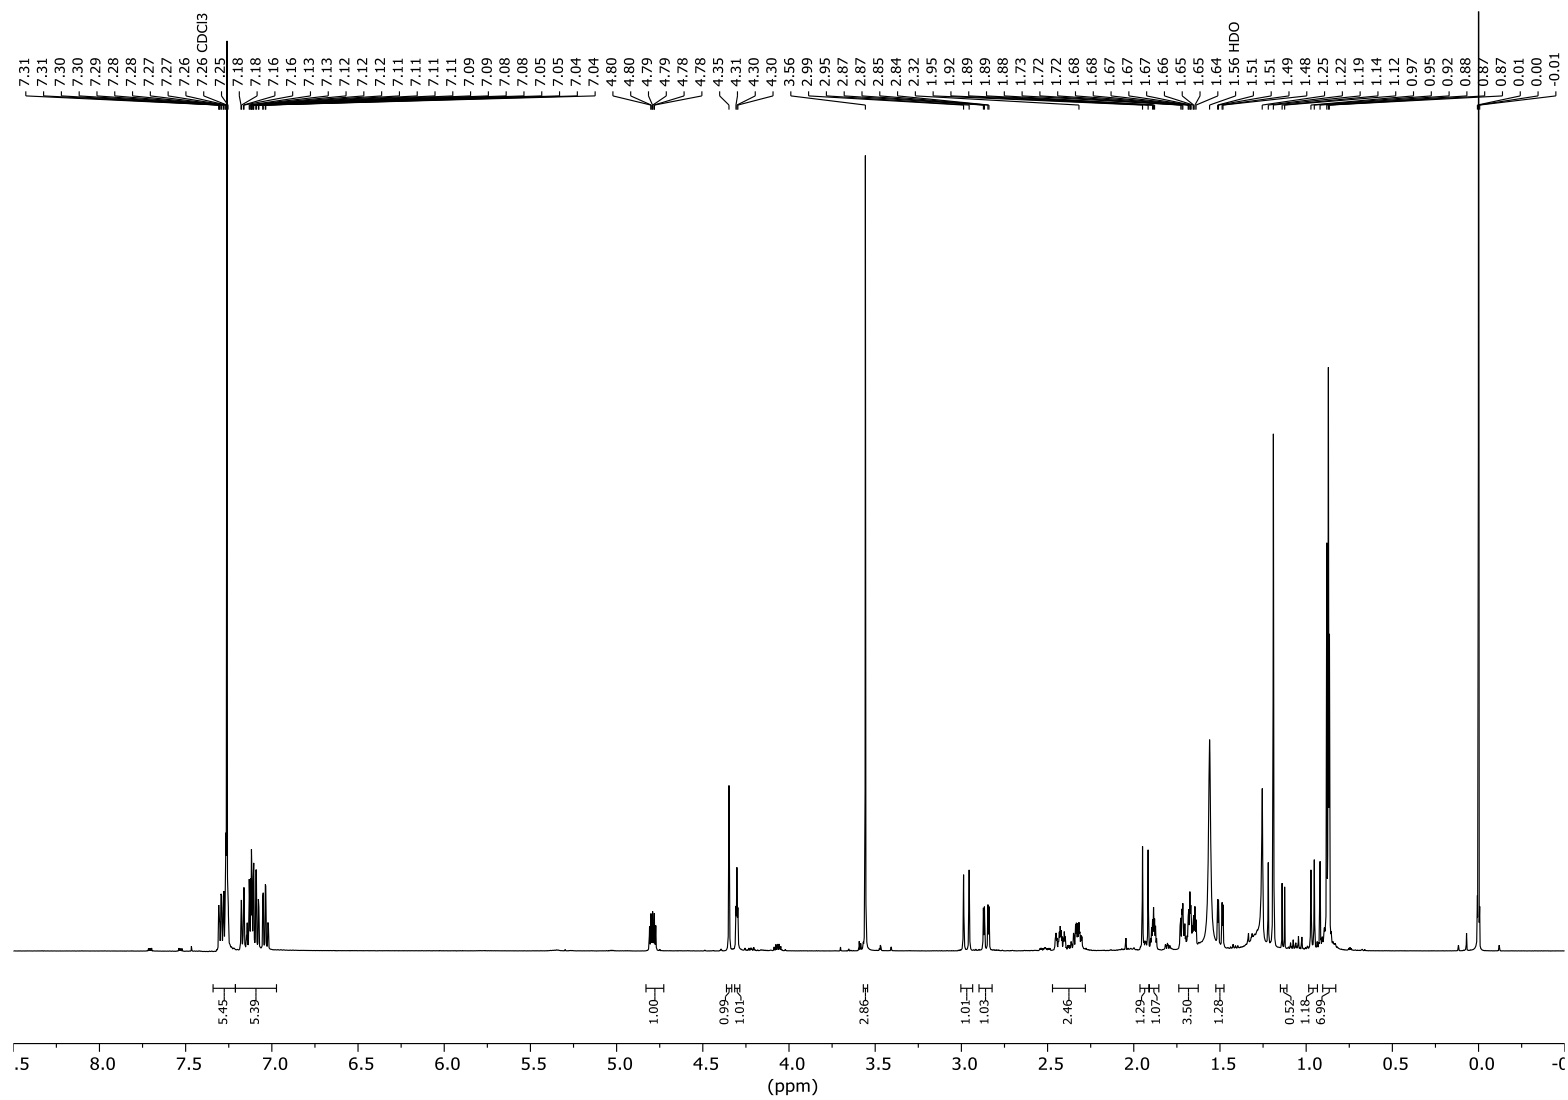

Figure S47 <sup>1</sup>H NMR (500 MHz, CDCl<sub>3</sub>) spectrum of (+)-(11*S*,1'*S*)-**25**



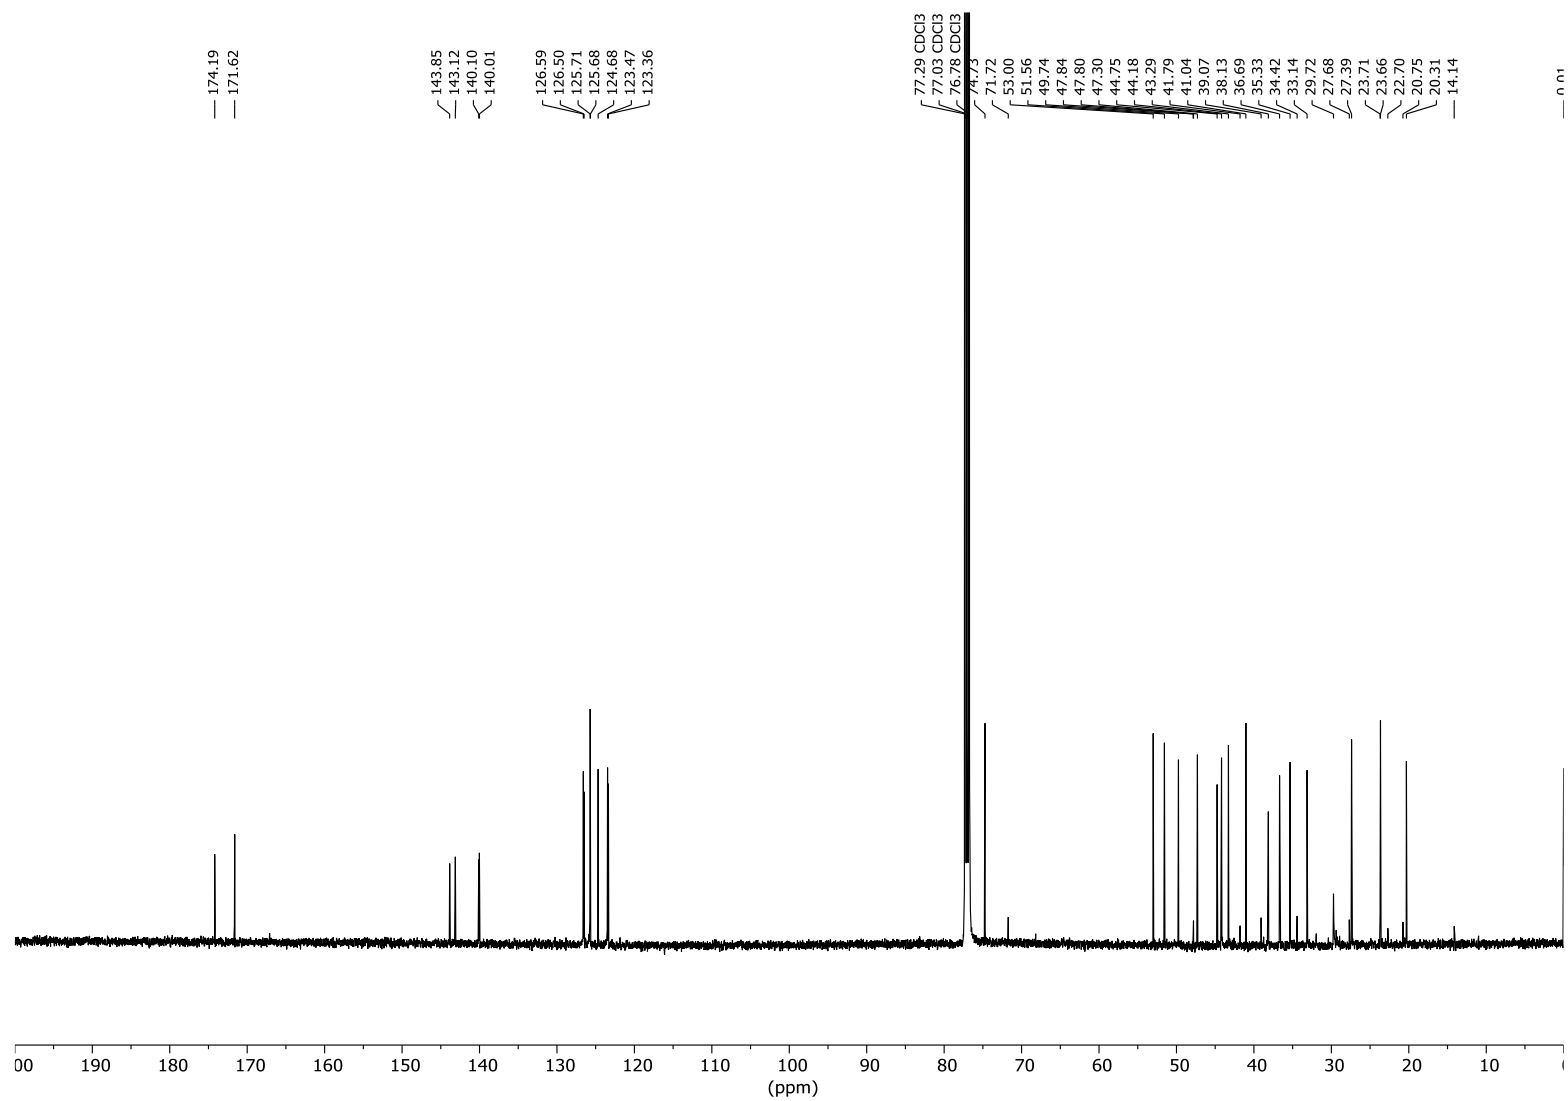

Figure S48  $^{13}\text{C}$  NMR (126 MHz,  $\text{CDCl}_3$ ) spectrum of (+)-(11*S*,1'*S*)-25

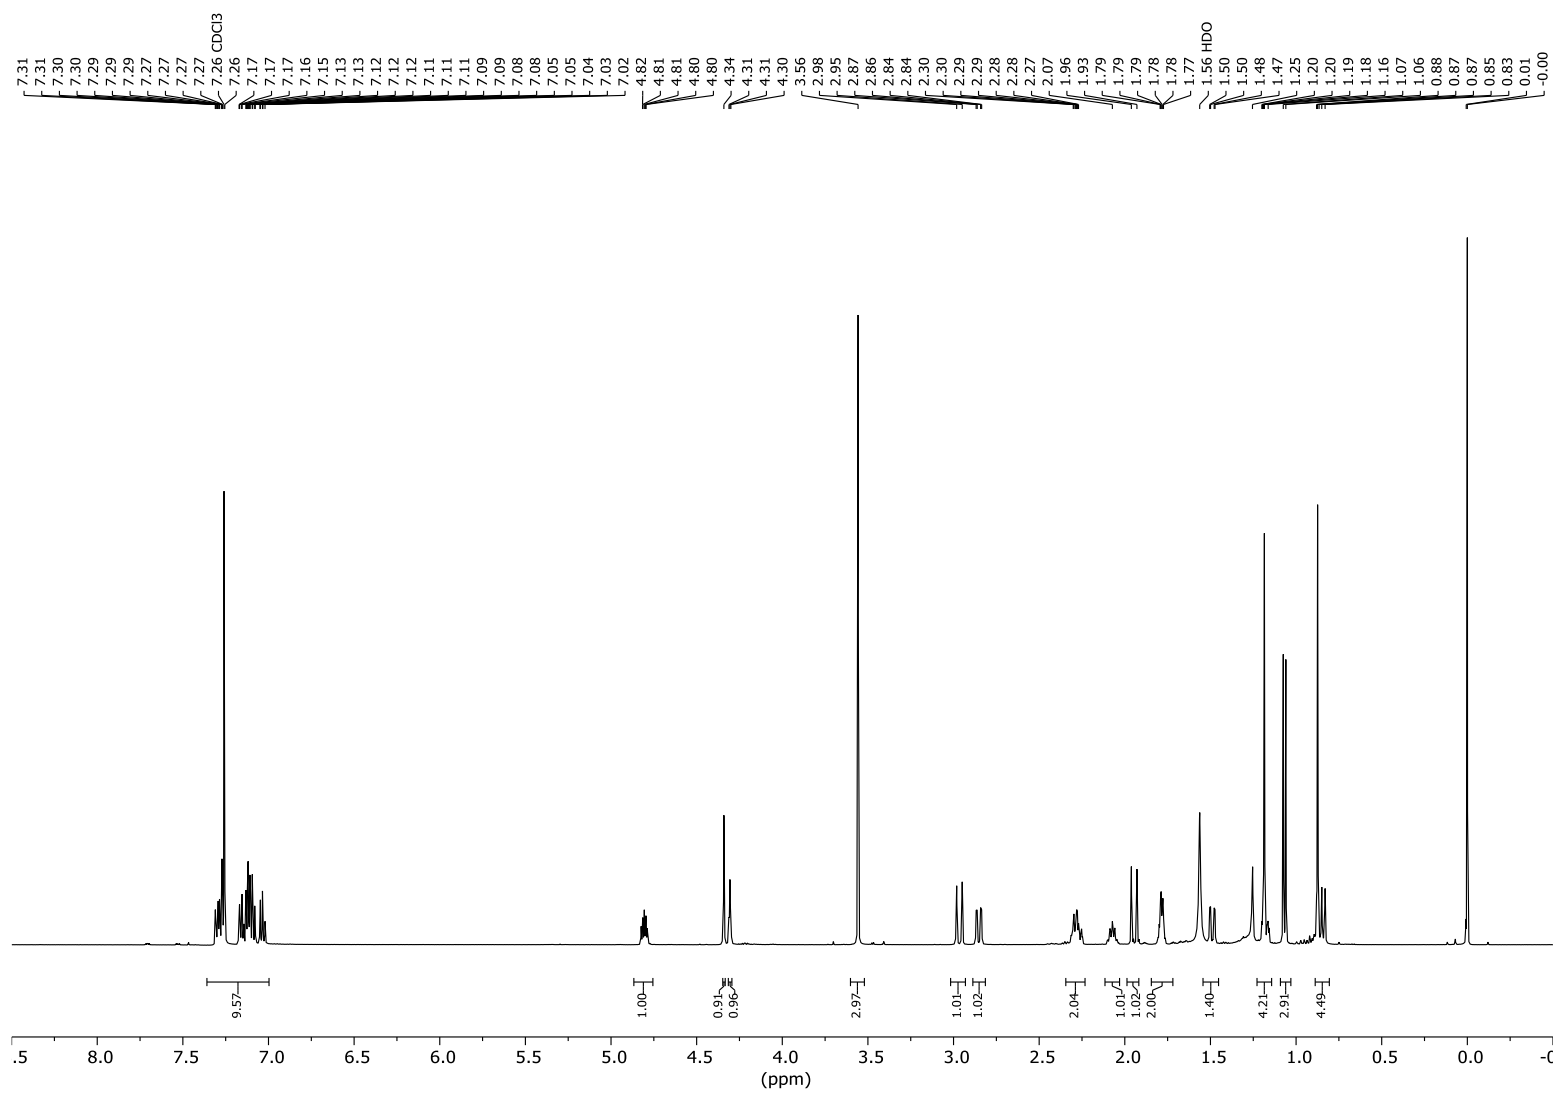

Figure S49  $^1\text{H}$  NMR (500 MHz,  $\text{CDCl}_3$ ) spectrum of  $(-)-(11R,1'S)$ -**26**

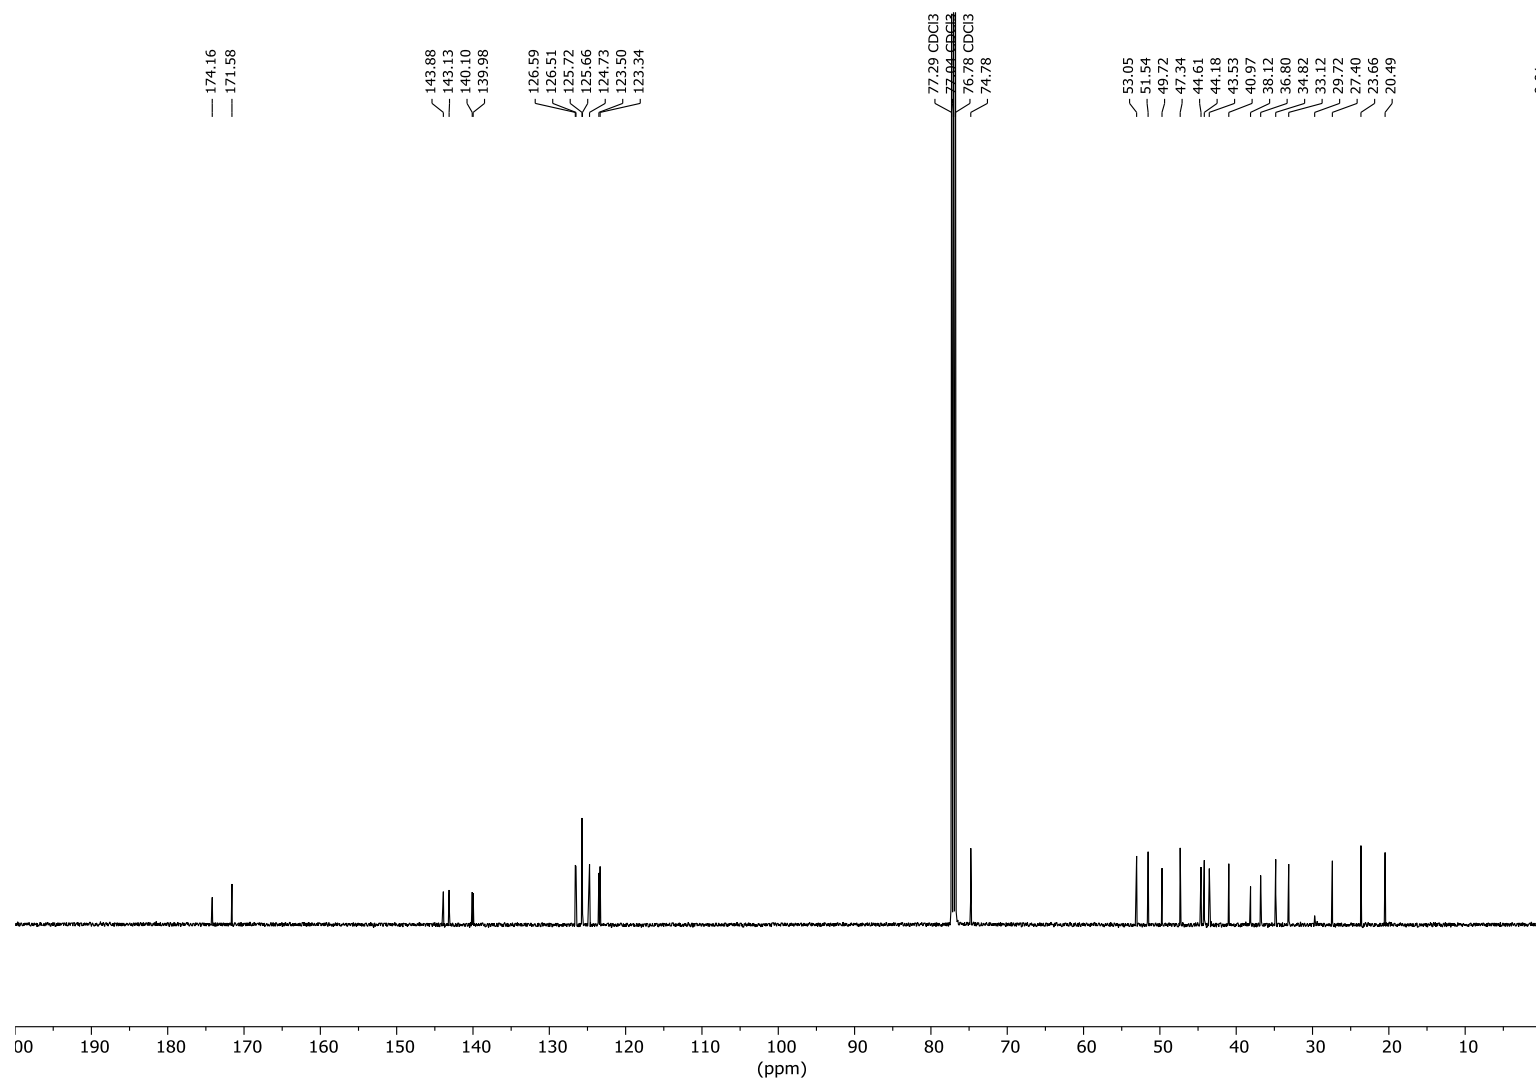

Figure S50  $^{13}\text{C}$  NMR (126 MHz,  $\text{CDCl}_3$ ) spectrum of  $(-)-(11R,1'S)$ -26

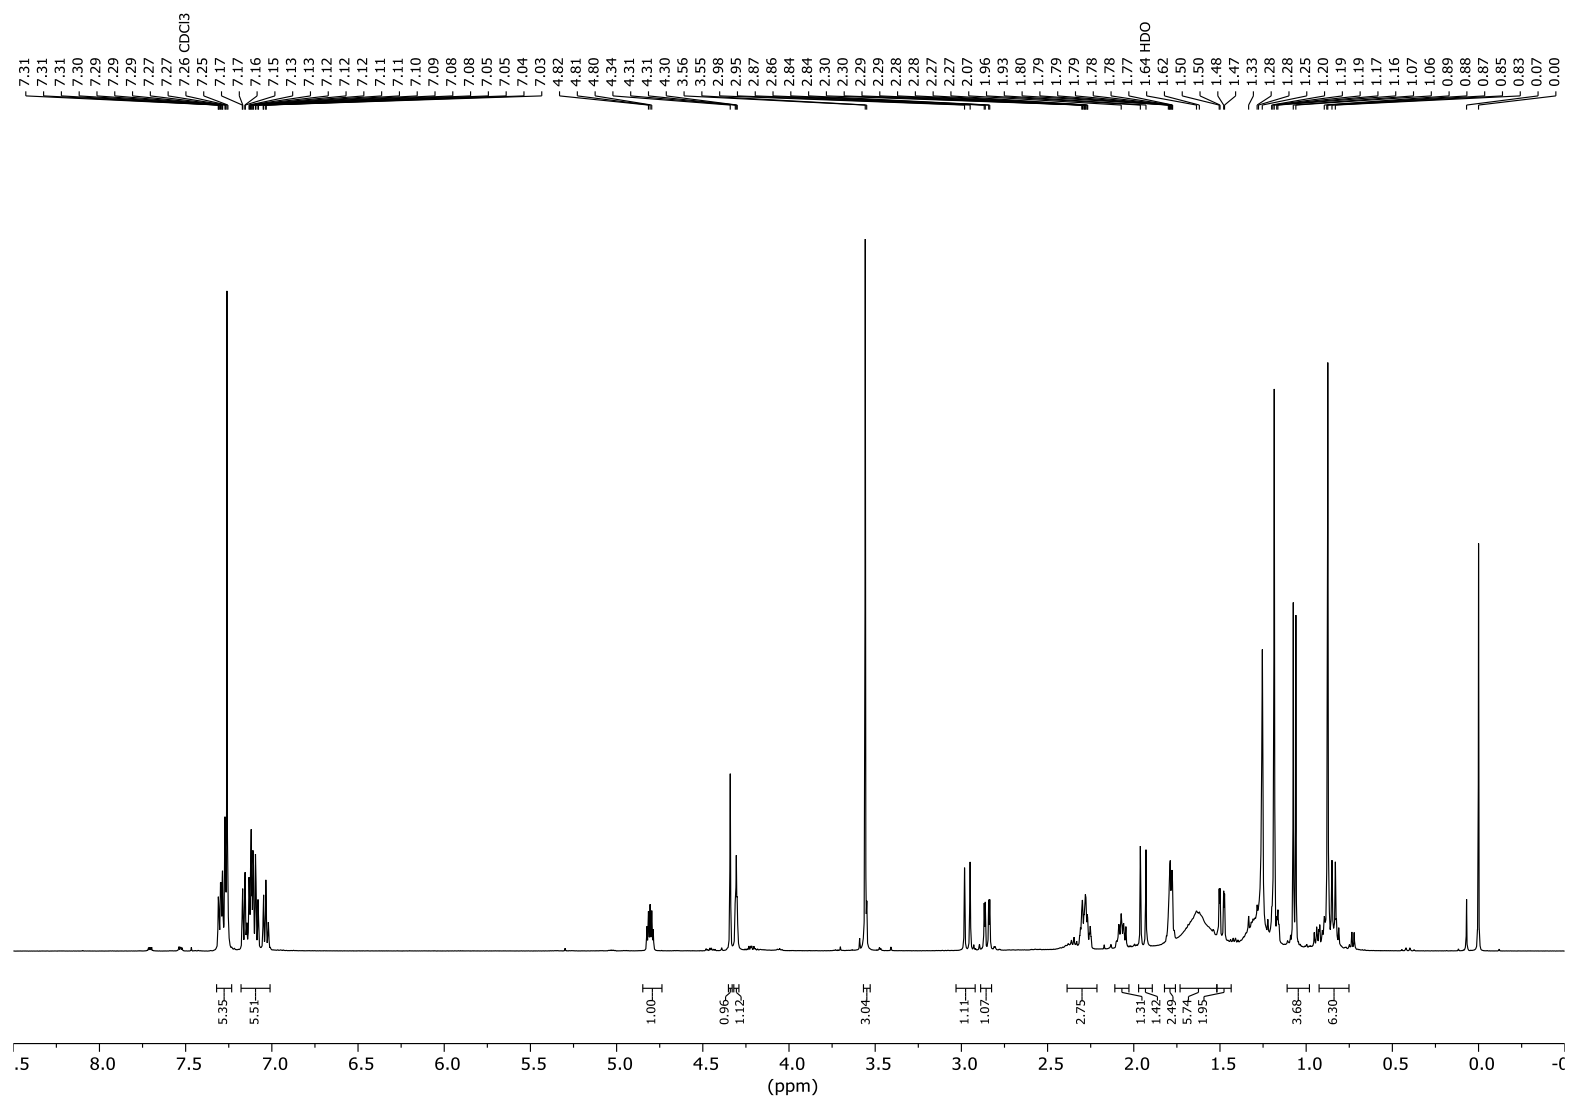

Figure S51 <sup>1</sup>H NMR (500 MHz, CDCl<sub>3</sub>) spectrum of (+)-(11*S*,1'*R*)-**27**

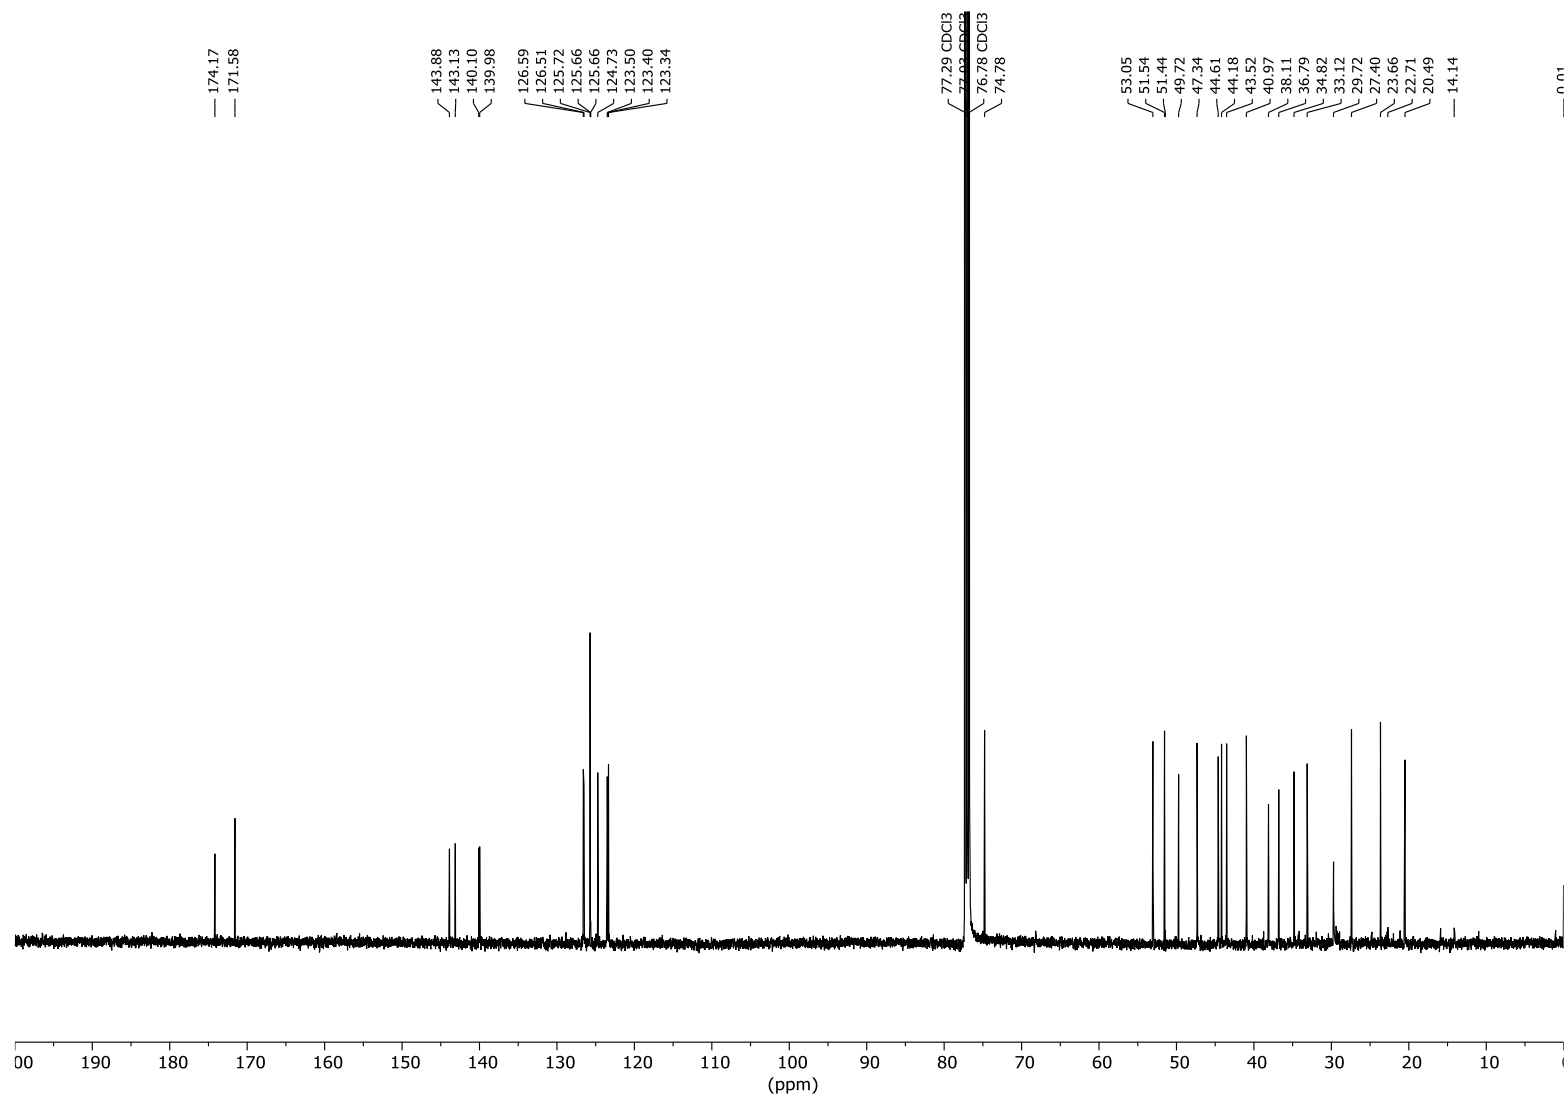

Figure S52  $^{13}\text{C}$  NMR (126 MHz,  $\text{CDCl}_3$ ) spectrum of (+)-(11*S*,1'*R*)-27

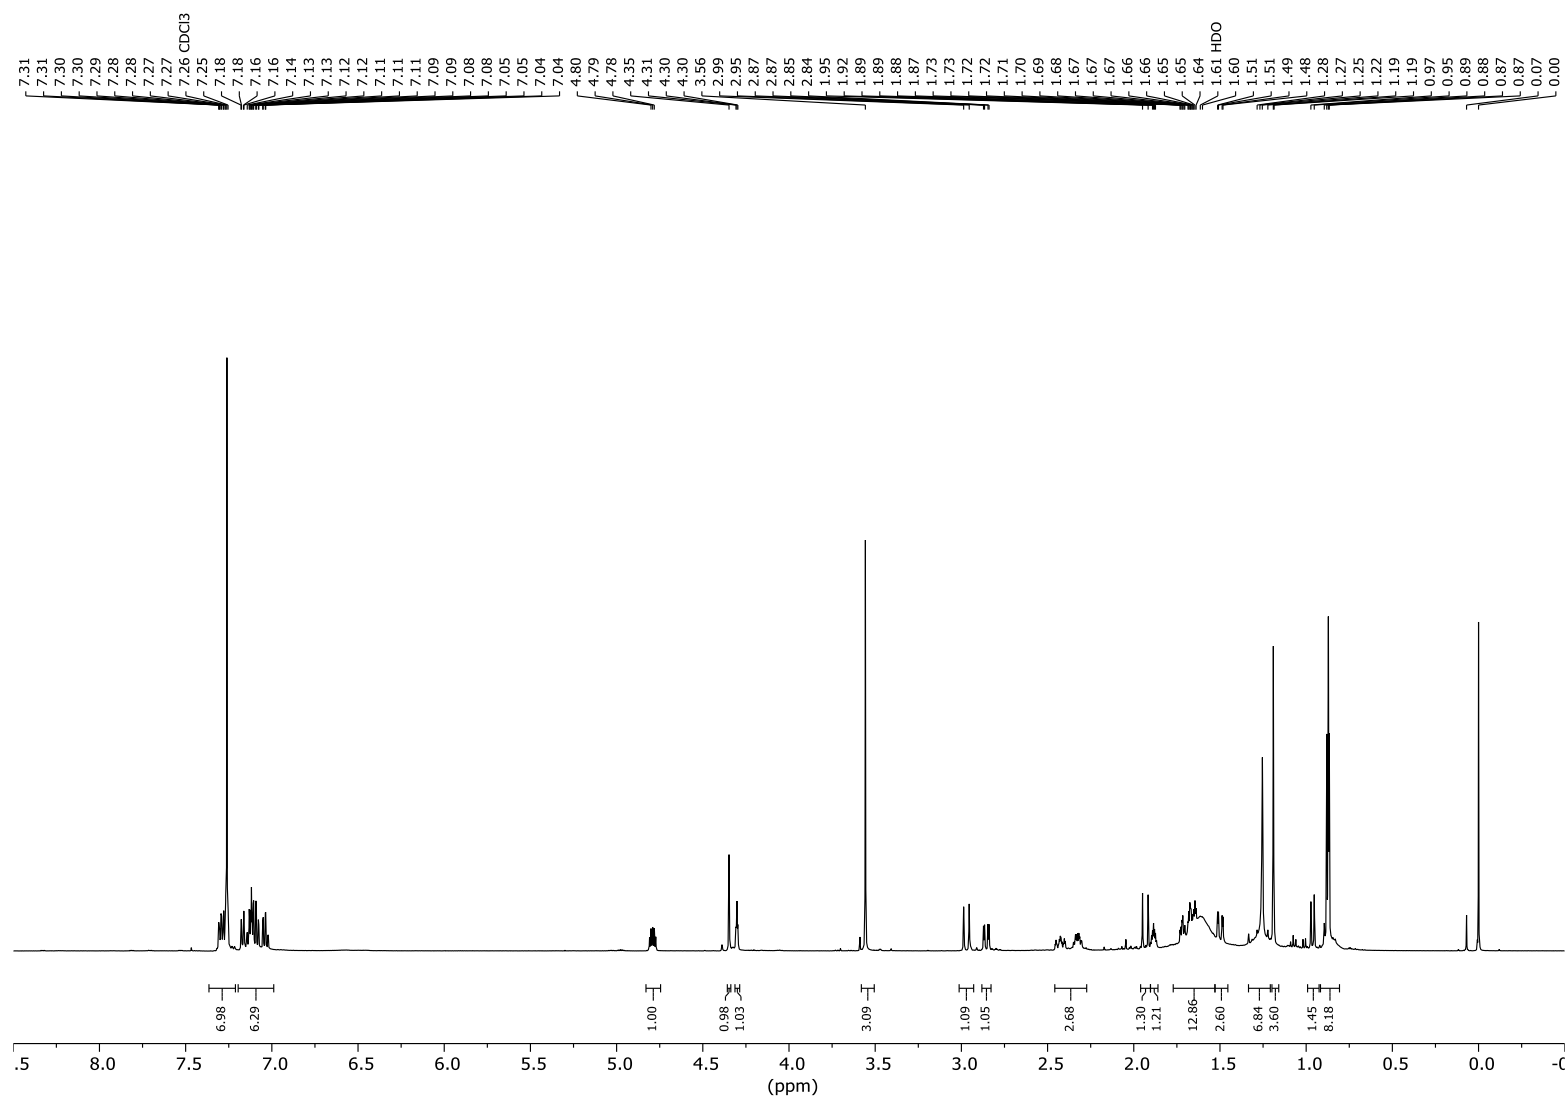

Figure S53 <sup>1</sup>H NMR (500 MHz, CDCl<sub>3</sub>) spectrum of (-)-(11*R*,1'*R*)-**28**

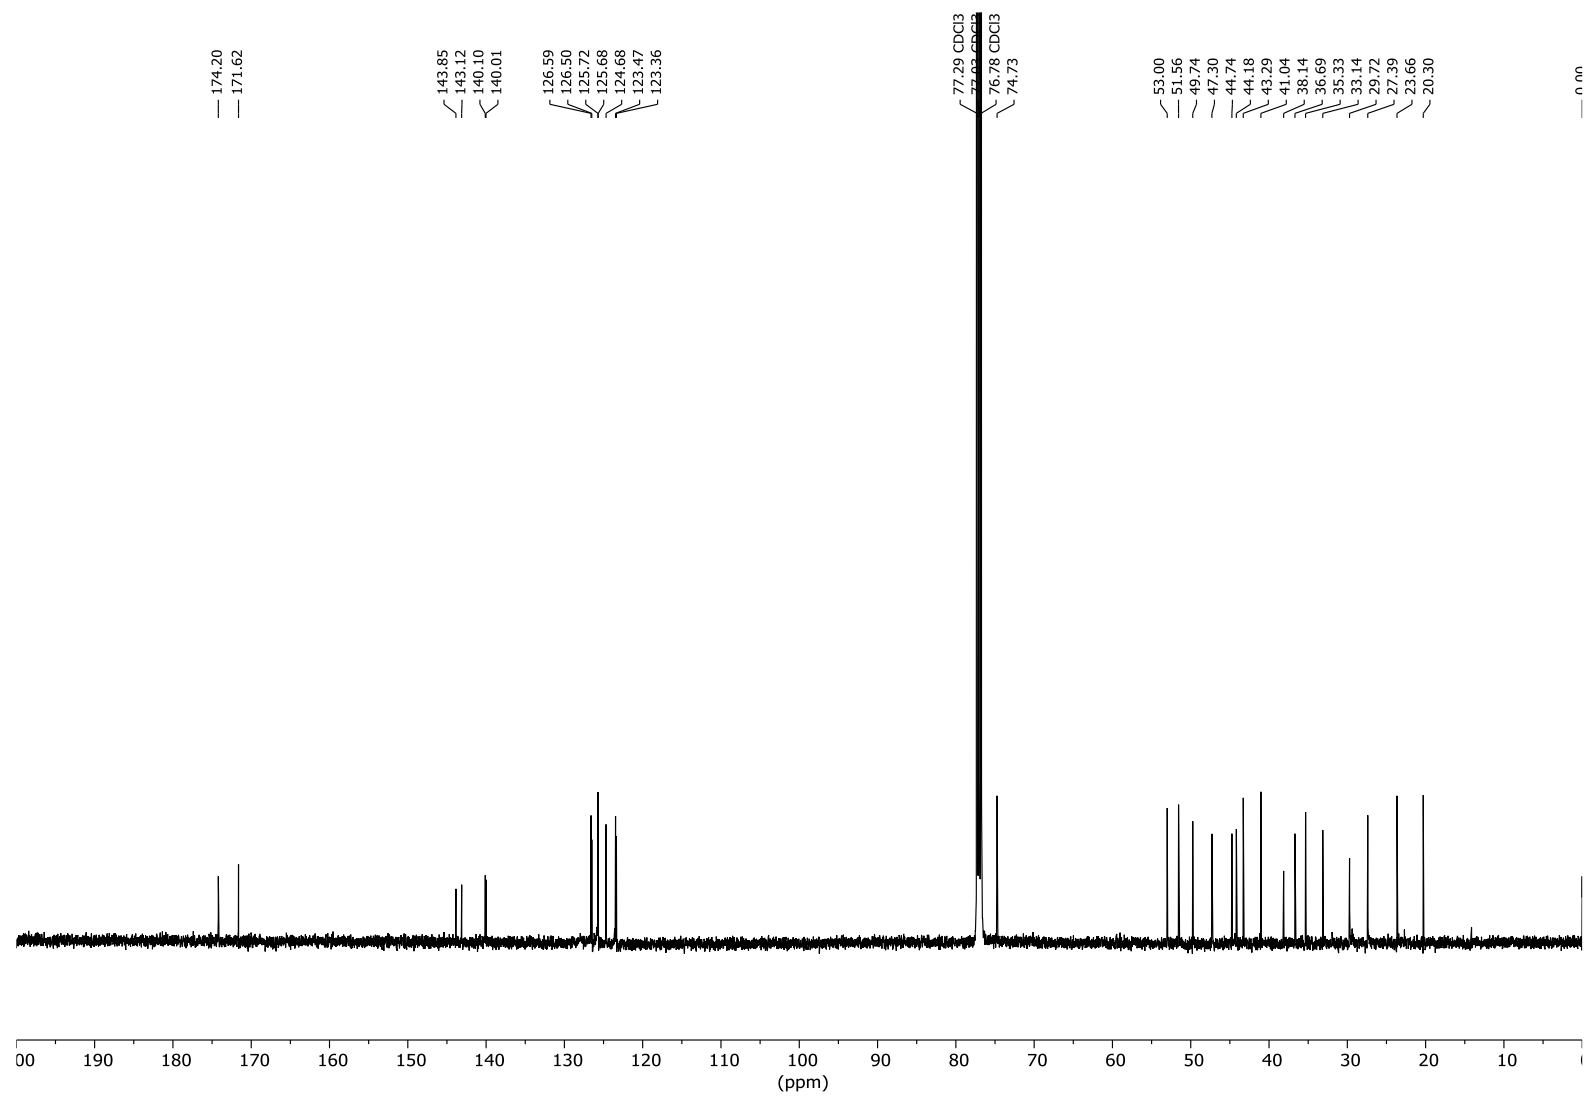

Figure S54  $^{13}\text{C}$  NMR (126 MHz,  $\text{CDCl}_3$ ) spectrum of  $(-)-(11R,1'R)$ -28

## II. Density Function Theory Calculations

The structures of selected chiral secondary alcohol which were bonded to the chiral derivatizing agents, methyl itaconate-anthracene adducts (**8**) were undergone the conformer distributions using Spartan14 with the Molecular Mechanic Force Field (MMFF) and further geometrical optimization with the Gaussian 09 program using the Density Functional Theory together with the 6-311++G(d,p), followed by frequency calculations at the same level of theory. Including the gas-phase single point energy calculations at these optimized structures were performed with the same level basis set.

The structures with the minimized energy were applied to identify and describe the influence of the anisotropic magnetic field from the aromatic part of anthracene to the different substituents of the selected alcohols. With the distance between the chiral alcohol substituents to the aromatic part of anthracene as well as the difference of chemical shift values described the shielding effect to the substituents which located close to the aromatic part.

### References

SPARTAN 14, Wavefunction Inc., Irvine, CA, 2014.

Except for molecular mechanics and semi-empirical models, the calculation methods used in Spartan have been documented in: Y. Shao, L. F. Molnar, Y. Jung, J. Kussmann, C. Ochsenfeld, S. T. Brown, A. T. B. Gilbert, L. V. Slipchenko, S. V. Levchenko, D. P. O'Neill, R. A. DiStasio Jr., R. C. Lochan, T. Wang, G. J. O. Beran, N. A. Besley, J. M. Herbert, C. Y. Lin, T. Van Voorhis, S. H. Chien, A. Sodt, R. P. Steele, V. A. Rassolov, P. E. Maslen, P. P. Korambath, R. D. Adamson, B. Austin, J. Baker, E. F. C. Byrd, H. Dachsel, R. J. Doerksen, A. Dreuw, B. D. Dunietz, A. D. Dutoi, T. R. Furlani, S. R. Gwaltney, A. Heyden, S. Hirata, C-P. Hsu, G. Kedziora, R. Z. Khalliulin, P. Klunzinger, A. M. Lee, M. S. Lee, W. Z. Liang, I. Lotan, N. Nair, B. Peters, E. I. Proynov, P. A. Pieniazek, Y. M. Rhee, J. Ritchie, E. Rosta, C. D. Sherrill, A. C. Simmonett, J. E. Subotnik, H. L. Woodcock III, W. Zhang, A. T. Bell, A. K. Chakraborty, D. M. Chipman, F. J. Keil, A. Warshel, W. J. Hehre, H. F. Schaefer, J. Kong, A. I. Krylov, P. M. W. Gill and M. Head-Gordon, *Phys. Chem. Chem. Phys.*, 2006, **8**, 3172.

Gaussian 09, Revision E.01, Frisch, M. J.; Trucks, G. W.; Schlegel, H. B.; Scuseria, G. E.; Robb, M. A.; Cheeseman, J. R.; Scalmani, G.; Barone, V.; Mennucci, B.; Petersson, G. A.; Nakatsuji, H.; Caricato, M.; Li, X.; Hratchian, H. P.; Izmaylov, A. F.; Bloino, J.; Zheng, G.; Sonnenberg, J.



L.; Hada, M.; Ehara, M.; Toyota, K.; Fukuda, R.; Hasegawa, J.; Ishida, M.; Nakajima, T.; Honda, Y.; Kitao, O.; Nakai, H.; Vreven, T.; Montgomery, J. A., Jr.; Peralta, J. E.; Ogliaro, F.; Bearpark, M.; Heyd, J. J.; Brothers, E.; Kudin, K. N.; Staroverov, V. N.; Kobayashi, R.; Normand, J.; Raghavachari, K.; Rendell, A.; Burant, J. C.; Iyengar, S. S.; Tomasi, J.; Cossi, M.; Rega, N.; Millam, J. M.; Klene, M.; Knox, J. E.; Cross, J. B.; Bakken, V.; Adamo, C.; Jaramillo, J.; Gomperts, R.; Stratmann, R. E.; Yazyev, O.; Austin, A. J.; Cammi, R.; Pomelli, C.; Ochterski, J. W.; Martin, R. L.; Morokuma, K.; Zakrzewski, V. G.; Voth, G. A.; Salvador, P.; Dannenberg, J. J.; Dapprich, S.; Daniels, A. D.; Farkas, Ö.; Foresman, J. B.; Ortiz, J. V.; Cioslowski, J.; Fox, D. J. Gaussian, Inc., Wallingford CT, 2009.

**(11S,1'S)-11**

Geometry with 54 atoms:

|   |               |               |               |
|---|---------------|---------------|---------------|
| C | -0.0222905852 | -0.0540091412 | 0.0309051326  |
| C | -0.0171836542 | -0.1579912357 | 2.8111899238  |
| C | 1.1869753575  | -0.1121617053 | 2.1112161902  |
| C | 1.1878138836  | -0.0561642519 | 0.7139770941  |
| C | -2.8902596448 | -3.2246967288 | -2.3649096304 |
| C | -1.68477634   | -3.1733108397 | -3.0618197864 |
| C | -2.3876388337 | 1.2405677299  | -1.0071642614 |
| C | -3.1962867274 | -2.248140318  | -1.4117207599 |
| C | -2.286910221  | -1.2277755576 | -1.1603596029 |
| C | -1.075583288  | -1.1730513934 | -1.8662486218 |
| C | -0.7730868807 | -2.1418809407 | -2.8162874622 |
| C | -2.4470288821 | -0.084436839  | -0.1764019393 |
| C | -1.0394866055 | 1.3354150119  | -1.7888571488 |
| C | -0.2088653101 | 0.0079392736  | -1.4734462641 |
| C | -1.2344796304 | -0.1504378787 | 2.1228903426  |
| C | -1.2347034173 | -0.1025124778 | 0.7344514772  |
| C | -0.1260565145 | 2.5078316541  | -1.3800814721 |
| C | -1.2513586832 | 1.4268952662  | -3.3127700371 |
| O | 0.8687969954  | 2.7888631375  | -2.0133159455 |

|   |               |               |               |
|---|---------------|---------------|---------------|
| O | -0.4978093295 | 3.1271058138  | -0.2564553782 |
| C | 0.3370863378  | 4.2271145646  | 0.2328834673  |
| C | -0.1045917836 | 5.5166599243  | -0.4460411292 |
| C | -1.9604501341 | 2.684153763   | -3.7662237593 |
| O | -2.2385410169 | 3.6339740694  | -3.0739166257 |
| O | -2.2424025161 | 2.620842118   | -5.084752237  |
| C | -2.8808632108 | 3.7801711559  | -5.6523136809 |
| C | 1.1113150984  | 5.195391882   | 2.4697920917  |
| C | 0.1786177294  | 4.2143992976  | 1.7517699843  |
| H | -0.0112355432 | -0.2039890618 | 3.8946571576  |
| H | 2.1274608289  | -0.1227399987 | 2.6508893472  |
| H | 2.1246439484  | -0.0153592955 | 0.1678624014  |
| H | -3.5930122258 | -4.0273979687 | -2.5588545062 |
| H | -1.4514201142 | -3.9355694872 | -3.7967394244 |
| H | -2.5046332468 | 2.0946217539  | -0.3449467306 |
| H | -3.2254470701 | 1.2511132942  | -1.7073475312 |
| H | -4.1346680066 | -2.2915831301 | -0.8678985832 |
| H | 0.1648188368  | -2.1007143275 | -3.3609670462 |
| H | -3.3835106771 | -0.1473945333 | 0.3807423175  |
| H | 0.7402478701  | 0.0302947939  | -2.0096382288 |
| H | -2.1711213881 | -0.1865255865 | 2.6701878058  |
| H | -1.8174651991 | 0.5641526874  | -3.6698097531 |
| H | -0.2858258254 | 1.4033986556  | -3.826152279  |
| H | 1.3684445965  | 3.9952419908  | -0.0425142858 |
| H | -0.0174311991 | 5.4292482168  | -1.5295083375 |
| H | 0.5230856229  | 6.3499324698  | -0.1206249232 |
| H | -1.1444753792 | 5.7452732525  | -0.197694096  |
| H | -3.0237417825 | 3.5458331264  | -6.7048441787 |
| H | -3.8398249288 | 3.9645736295  | -5.1661582566 |
| H | -2.2452805609 | 4.6592609151  | -5.5374844923 |
| H | 1.0073656556  | 5.0972689983  | 3.5532457481  |

|   |              |              |              |
|---|--------------|--------------|--------------|
| H | 2.1595663463 | 5.0029139678 | 2.2201500584 |
| H | 0.8921471483 | 6.2349529453 | 2.2131594565 |
| H | -0.865094009 | 4.4357915789 | 2.0013312374 |
| H | 0.3763696861 | 3.1965995036 | 2.1003516    |

**(11*R*,1'*S*)-12**

Geometry with 54 atoms:

|   |               |               |               |
|---|---------------|---------------|---------------|
| C | -0.0024886758 | -0.0116290942 | -0.0090797527 |
| C | 0.0441254478  | -0.1063688837 | 2.773511827   |
| C | 1.2353884378  | -0.1451952607 | 2.0510424125  |
| C | 1.217078453   | -0.0920632216 | 0.6539605947  |
| C | -3.1641998975 | -2.9643192527 | -2.32601721   |
| C | -1.9714707252 | -3.0140341718 | -3.045934224  |
| C | -2.2635470919 | 1.453201633   | -1.0041988305 |
| C | -3.3729732616 | -1.9587485333 | -1.3776909058 |
| C | -2.3782781848 | -1.0133879145 | -1.1549595221 |
| C | -1.1788531513 | -1.0624468035 | -1.8799277545 |
| C | -0.9748268859 | -2.058593042  | -2.8279907869 |
| C | -2.42407062   | 0.1409234142  | -0.1724470014 |
| C | -0.9374646145 | 1.411158445   | -1.8380958591 |
| C | -0.2056414155 | 0.0460521535  | -1.5127787009 |
| C | -1.1816076175 | -0.0140607104 | 2.1069666146  |
| C | -1.2010612345 | 0.0291840119  | 0.7178284233  |
| C | -0.0574680698 | 2.6454705494  | -1.4568774109 |
| C | -1.1521632659 | 1.488672592   | -3.3613932621 |
| O | -0.351774917  | 1.0651833386  | -4.1628069872 |
| O | -2.2772513127 | 2.1388157349  | -3.703776376  |
| C | -2.5524083007 | 2.3318319849  | -5.1309931785 |
| C | -2.7082376751 | 4.8701711473  | -4.7821491285 |
| C | -3.4093504142 | 3.5890116893  | -5.2395671834 |
| C | -3.2326855256 | 1.0857108194  | -5.6825453214 |

|   |               |               |               |
|---|---------------|---------------|---------------|
| C | 1.2642500601  | 2.7385081751  | -2.1947439715 |
| O | 2.2368410606  | 2.0586529267  | -1.9705296246 |
| O | 1.2335192608  | 3.7007834618  | -3.1403548499 |
| C | 2.4239927313  | 3.8325140793  | -3.9409381004 |
| H | 0.066632438   | -0.1491817031 | 3.8568960779  |
| H | 2.1826265029  | -0.2146505091 | 2.5742568962  |
| H | 2.1423902755  | -0.1004053535 | 0.089166861   |
| H | -3.9322817296 | -3.7100283484 | -2.4993118457 |
| H | -1.8151005572 | -3.7975950517 | -3.7790952697 |
| H | -2.2495732145 | 2.3072748557  | -0.3227365374 |
| H | -3.1218102534 | 1.5765667576  | -1.6617461422 |
| H | -4.3007763806 | -1.9215594249 | -0.8153756236 |
| H | -0.0511133356 | -2.0887507404 | -3.395343341  |
| H | -3.3533891075 | 0.161345936   | 0.4000618196  |
| H | 0.7295689543  | -0.0245083321 | -2.0618702093 |
| H | -2.1091516975 | 0.0170830878  | 2.670125777   |
| H | 0.1698621614  | 2.5750319069  | -0.3914521034 |
| H | -0.6318290945 | 3.556404348   | -1.6316912082 |
| H | -1.5890601653 | 2.4805228203  | -5.6242535878 |
| H | -3.363536271  | 5.7363868887  | -4.9048713853 |
| H | -2.4237112419 | 4.8114989118  | -3.7296050958 |
| H | -1.7999666998 | 5.0537360749  | -5.3640424528 |
| H | -3.7092811596 | 3.6862066044  | -6.2888706722 |
| H | -4.3307813007 | 3.4357268571  | -4.6665196249 |
| H | -2.5967740661 | 0.2083129472  | -5.558730733  |
| H | -3.4322339061 | 1.2143915532  | -6.7499704414 |
| H | -4.1838561652 | 0.9070960869  | -5.1738063115 |
| H | 2.6101585565  | 2.9087156352  | -4.4897804529 |
| H | 2.223557564   | 4.653161258   | -4.6262376373 |
| H | 3.284392885   | 4.0589494614  | -3.3100314053 |

(11*S*,1'*R*)-13

Geometry with 54 atoms:

|   |               |               |               |
|---|---------------|---------------|---------------|
| C | 1.7309185272  | -0.1931297983 | -1.265378206  |
| C | 2.5019835751  | -2.6205396488 | -2.3856056454 |
| C | 3.4010171097  | -1.8918174872 | -1.6095187067 |
| C | 3.0154236725  | -0.673615669  | -1.0420207397 |
| C | -0.4714550846 | 3.0472233404  | -4.2059687058 |
| C | 0.426298818   | 3.7677767275  | -3.4209352554 |
| C | -1.1105415859 | -0.071834091  | -0.7548957252 |
| C | -0.8187083551 | 1.737625108   | -3.8589738205 |
| C | -0.2580383775 | 1.1574207754  | -2.7275088932 |
| C | 0.6416301412  | 1.8851928165  | -1.9339201274 |
| C | 0.9839586546  | 3.1881461413  | -2.2770516853 |
| C | -0.5183907197 | -0.2384192615 | -2.1932231864 |
| C | -0.1216924209 | 0.7235103804  | 0.1545647273  |
| C | 1.1476146888  | 1.1037095416  | -0.7361240053 |
| C | 1.2085787589  | -2.1375816407 | -2.6079514702 |
| C | 0.8275898011  | -0.9225189912 | -2.0523941168 |
| C | 0.4239215894  | -0.05272654   | 1.3711142426  |
| C | -0.7416904212 | 2.029379328   | 0.6928085403  |
| O | 1.0919962922  | 0.4936678109  | 2.22267719    |
| O | 0.1234408716  | -1.353953667  | 1.3778920839  |
| C | 0.5818543182  | -2.1663582281 | 2.5094444969  |
| C | -1.830384737  | -2.762736607  | 3.1391499878  |
| C | -0.4568506365 | -3.2688411911 | 2.6910509381  |
| C | 1.9814701299  | -2.6892768031 | 2.2169315712  |
| C | -1.9212051144 | 1.8281754003  | 1.618597053   |
| O | -2.341079102  | 0.7691481028  | 2.0204097772  |
| O | -2.4615591027 | 3.0162944533  | 1.9615174312  |
| C | -3.5747291177 | 2.9664411109  | 2.873912614   |
| H | 2.8076855875  | -3.563898899  | -2.8245289305 |

|   |               |               |               |
|---|---------------|---------------|---------------|
| H | 4.4042629327  | -2.2693034213 | -1.445832571  |
| H | 3.7133928398  | -0.1071715512 | -0.4341247984 |
| H | -0.8999988246 | 3.5015312878  | -5.0924028586 |
| H | 0.694766354   | 4.7812393242  | -3.6973847561 |
| H | -1.3165372371 | -1.0504784515 | -0.3292010439 |
| H | -2.0611518044 | 0.4602874725  | -0.8268998733 |
| H | -1.5159730908 | 1.1769579951  | -4.4735194129 |
| H | 1.6812396752  | 3.7506007489  | -1.6642892284 |
| H | -1.2040970813 | -0.8021698513 | -2.8283433899 |
| H | 1.8632192948  | 1.667719616   | -0.1373682605 |
| H | 0.5111881804  | -2.7046766579 | -3.2164043828 |
| H | -1.0629968046 | 2.6640171858  | -0.1359627649 |
| H | 0.0088553272  | 2.5975259733  | 1.2493256139  |
| H | 0.6028203254  | -1.511367948  | 3.3831541998  |
| H | -2.235352723  | -2.0326713381 | 2.4362368881  |
| H | -2.5402442898 | -3.5901919514 | 3.22260018    |
| H | -1.769104796  | -2.2768645361 | 4.1178432977  |
| H | -0.5418354209 | -3.8235186524 | 1.7496605589  |
| H | -0.0600990249 | -3.9727927924 | 3.4312406699  |
| H | 2.6831574095  | -1.8652316661 | 2.0820040601  |
| H | 2.3296103861  | -3.3000152905 | 3.0546788856  |
| H | 1.9851884964  | -3.3039272511 | 1.3132363295  |
| H | -3.8649550612 | 4.0025570665  | 3.0331691229  |
| H | -4.3991806381 | 2.3990550866  | 2.4399465287  |
| H | -3.2752321853 | 2.5024271081  | 3.8145655721  |

**(11*R*,1'*R*)-14**

Geometry with 54 atoms:

|   |               |               |               |
|---|---------------|---------------|---------------|
| C | 2.1097053804  | -1.2528453972 | -1.1750597704 |
| C | -4.8595414754 | -1.5738183775 | -0.8792166659 |
| C | -4.1052526372 | -2.5585019353 | -1.5138506331 |

|   |               |               |               |
|---|---------------|---------------|---------------|
| C | -2.723365636  | -2.4018842303 | -1.6603299717 |
| C | -0.5606528483 | 3.0169531196  | -2.954541874  |
| C | 0.1970733695  | 2.0274198119  | -3.577388975  |
| C | -0.9717199091 | 0.3611026334  | 0.9283905576  |
| C | -1.29893669   | 2.7214411263  | -1.8041992247 |
| C | -1.279174165  | 1.429786949   | -1.2922636541 |
| C | -0.5158290153 | 0.4341401742  | -1.9198894417 |
| C | 0.2259820903  | 0.7298873902  | -3.0573206456 |
| C | -2.0313401175 | 0.9184865109  | -0.0785985112 |
| C | -0.1126336318 | -0.7548876093 | 0.2550886879  |
| C | -0.6307213613 | -0.9195738118 | -1.2444660795 |
| C | -4.2419722114 | -0.4188297794 | -0.3885306968 |
| C | -2.8702613327 | -0.2579398597 | -0.5420868658 |
| C | -0.2658756267 | -2.1183691445 | 0.9639310374  |
| C | 1.400094483   | -0.4632347552 | 0.1636254884  |
| O | 2.1738934721  | -1.289339618  | -0.271188033  |
| O | 1.7626758634  | 0.7550665174  | 0.5739198448  |
| C | 3.1953420545  | 1.0726897413  | 0.5972179039  |
| C | 0.243751974   | -2.1536868676 | 2.3876273486  |
| O | 0.8820051698  | -1.2897014354 | 2.9395783413  |
| O | -0.0988368402 | -3.3158540493 | 2.9834527548  |
| C | 0.3680695344  | -3.4972723787 | 4.3335678259  |
| C | 3.8214640597  | 0.4769540662  | 1.8517270325  |
| C | 2.816595388   | 3.2102171089  | -0.7742251416 |
| C | 3.3018640006  | 2.5929027505  | 0.5383346973  |
| H | -5.9308188912 | -1.7004190218 | -0.7690529012 |
| H | -4.5903796853 | -3.4495340363 | -1.8963681848 |
| H | -2.1355760931 | -3.1707134413 | -2.151676014  |
| H | -0.5800281021 | 4.0209114985  | -3.3639169415 |
| H | 0.766117253   | 2.2631719932  | -4.4697310962 |
| H | -1.4927534163 | -0.0420268754 | 1.7992211848  |

|   |               |               |               |
|---|---------------|---------------|---------------|
| H | -0.3364969524 | 1.1718576651  | 1.2765206762  |
| H | -1.8899178318 | 3.493340204   | -1.3214180524 |
| H | 0.8176744385  | -0.0409493034 | -3.5401037313 |
| H | -2.6357466012 | 1.6967135817  | 0.3909355273  |
| H | -0.0489153774 | -1.6882024961 | -1.7532272452 |
| H | -4.8319667258 | 0.3490372091  | 0.1018688231  |
| H | 0.2832995409  | -2.8861993778 | 0.4107588661  |
| H | -1.3133150193 | -2.4257766992 | 0.9679029791  |
| H | 3.6379281114  | 0.6211575533  | -0.2938883682 |
| H | -0.0012852107 | -4.4737445017 | 4.6388745687  |
| H | 1.4581623507  | -3.4718274215 | 4.3663438996  |
| H | -0.028816303  | -2.7160396075 | 4.9832313731  |
| H | 3.7000674207  | -0.6058663327 | 1.8732373604  |
| H | 4.8911896269  | 0.7039957198  | 1.8694552002  |
| H | 3.3602918796  | 0.8959219214  | 2.7493168152  |
| H | 2.9233296336  | 4.2982679168  | -0.75380329   |
| H | 3.3963918127  | 2.8358022913  | -1.6235858601 |
| H | 1.7667362606  | 2.9788240019  | -0.9604015612 |
| H | 2.7469870813  | 3.0123930796  | 1.3851538328  |
| H | 4.3548482085  | 2.8485958684  | 0.7010468029  |

### III. Crystallographic Data

Single crystals of **11** - **14** were crystallized in CH<sub>2</sub>Cl<sub>2</sub>/hexane. A suitable crystal was selected and collected on a SuperNova, Single source at offset/far, HyPix3000 diffractometer. The crystal was kept at 293(2) K during data collection. Using Olex2 [1], the structure was solved with the SHELXT [2] structure solution program using Intrinsic Phasing and refined with the SHELXL [3] refinement package using Least Squares minimization. ORTEP diagrams of the asymmetric units and crystallographic data are shown below.



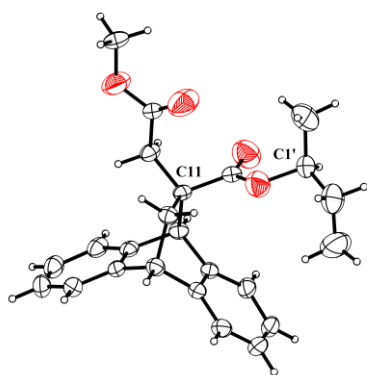

(11*S*,1'*S*)-11

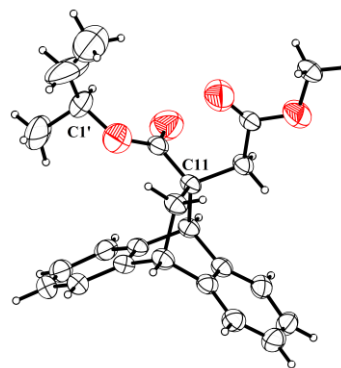

(11*R*,1'*S*)-12

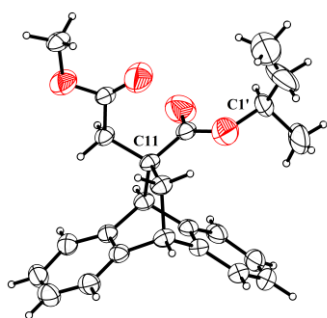

(11*S*,1'*R*)-13

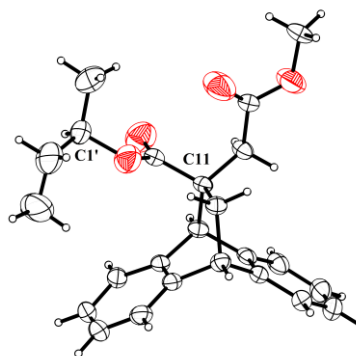

(11*R*,1'*R*)-14

**Figure S55** ORTEP diagram of the X-ray crystal structure of **11-14**

Crystal data and structure refinement for **11** – **14**.

| Identification Code                                  | (11 <i>S</i> ,1' <i>S</i> )- <b>11</b>                                          | (11 <i>R</i> ,1' <i>S</i> )- <b>12</b>                                          | (11 <i>S</i> ,1' <i>R</i> )- <b>13</b>                                          | (11 <i>R</i> ,1' <i>R</i> )- <b>14</b>                                          |
|------------------------------------------------------|---------------------------------------------------------------------------------|---------------------------------------------------------------------------------|---------------------------------------------------------------------------------|---------------------------------------------------------------------------------|
| CCDC No.                                             | 2094178                                                                         | 2094086                                                                         | 1873119                                                                         | 2094087                                                                         |
| Empirical formula                                    | C <sub>24</sub> H <sub>26</sub> O <sub>4</sub>                                  |
| Formula weight                                       | 378.45                                                                          | 378.45                                                                          | 378.45                                                                          | 378.45                                                                          |
| Temperature/K                                        | 293(2)                                                                          | 293(2)                                                                          | 293(2)                                                                          | 293(2)                                                                          |
| Crystal system                                       | orthorhombic                                                                    | orthorhombic                                                                    | orthorhombic                                                                    | orthorhombic                                                                    |
| Space group                                          | <i>P</i> 2 <sub>1</sub> 2 <sub>1</sub> 2 <sub>1</sub>                           |
| <i>a</i> /Å                                          | 10.0659(2)                                                                      | 10.1047(2)                                                                      | 10.1003(3)                                                                      | 10.0685(3)                                                                      |
| <i>b</i> /Å                                          | 10.1740(3)                                                                      | 10.1997(3)                                                                      | 10.1984(3)                                                                      | 10.1743(3)                                                                      |
| <i>c</i> /Å                                          | 20.3251(5)                                                                      | 20.2588(5)                                                                      | 20.2551(5)                                                                      | 20.3368(6)                                                                      |
| Volume/Å <sup>3</sup>                                | 2081.50(9)                                                                      | 2087.9(9)                                                                       | 2086.4(1)                                                                       | 2083.3(1)                                                                       |
| <i>Z</i>                                             | 4                                                                               | 4                                                                               | 4                                                                               | 4                                                                               |
| Crystal size/mm <sup>3</sup>                         | 0.5 × 0.4 × 0.3                                                                 | 0.4 × 0.35 × 0.3                                                                | 0.4 × 0.3 × 0.3                                                                 | 0.4 × 0.4 × 0.3                                                                 |
| Radiation                                            | MoKα (λ = 0.71073)                                                              | Mo Kα (λ = 0.71073)                                                             | Mo Kα (λ = 0.71073)                                                             | MoKα (λ = 0.71073)                                                              |
| 2θ range for data collection/°                       | 4.478 to 54.886                                                                 | 4.02 to 54.914                                                                  | 4.022 to 54.816                                                                 | 4.476 to 54.852                                                                 |
| Index ranges                                         | -12 ≤ <i>h</i> ≤ 12, -12 ≤ <i>k</i> ≤ 12,<br>-25 ≤ <i>l</i> ≤ 26                | -13 ≤ <i>h</i> ≤ 12, -13 ≤ <i>k</i> ≤ 12,<br>-24 ≤ <i>l</i> ≤ 25                | -12 ≤ <i>h</i> ≤ 12, -12 ≤ <i>k</i> ≤ 12,<br>-25 ≤ <i>l</i> ≤ 25                | -12 ≤ <i>h</i> ≤ 12, -12 ≤ <i>k</i> ≤ 12,<br>-25 ≤ <i>l</i> ≤ 25                |
| Reflections collected                                | 23193                                                                           | 26461                                                                           | 23812                                                                           | 16394                                                                           |
| Independent reflections                              | 4427 [ <i>R</i> <sub>int</sub> = 0.0391,<br><i>R</i> <sub>sigma</sub> = 0.0354] | 4494 [ <i>R</i> <sub>int</sub> = 0.0506,<br><i>R</i> <sub>sigma</sub> = 0.0302] | 4493 [ <i>R</i> <sub>int</sub> = 0.0443,<br><i>R</i> <sub>sigma</sub> = 0.0297] | 4382 [ <i>R</i> <sub>int</sub> = 0.0466,<br><i>R</i> <sub>sigma</sub> = 0.0411] |
| Data/restraints/parameters                           | 4427/0/257                                                                      | 4494/0/257                                                                      | 4493/0/257                                                                      | 4382/0/257                                                                      |
| Goodness-of-fit on F <sup>2</sup>                    | 1.059                                                                           | 1.079                                                                           | 1.063                                                                           | 1.029                                                                           |
| Final <i>R</i> indexes [ <i>I</i> ≥ 2σ ( <i>I</i> )] | <i>R</i> <sub>1</sub> = 0.0506, <i>wR</i> <sub>2</sub> = 0.1279                 | <i>R</i> <sub>1</sub> = 0.0604, <i>wR</i> <sub>2</sub> = 0.1758                 | <i>R</i> <sub>1</sub> = 0.0591, <i>wR</i> <sub>2</sub> = 0.1691                 | <i>R</i> <sub>1</sub> = 0.0523, <i>wR</i> <sub>2</sub> = 0.1299                 |
| Final <i>R</i> indexes [all data]                    | <i>R</i> <sub>1</sub> = 0.0720, <i>wR</i> <sub>2</sub> = 0.1412                 | <i>R</i> <sub>1</sub> = 0.0837, <i>wR</i> <sub>2</sub> = 0.1937                 | <i>R</i> <sub>1</sub> = 0.0796, <i>wR</i> <sub>2</sub> = 0.1850                 | <i>R</i> <sub>1</sub> = 0.0760, <i>wR</i> <sub>2</sub> = 0.1456                 |
| Largest diff. peak/hole / e Å <sup>-3</sup>          | 0.30/-0.19                                                                      | 0.42/-0.20                                                                      | 0.39/-0.21                                                                      | 0.27/-0.18                                                                      |
| Flack parameter                                      | 0.3(5)                                                                          | -0.2(4)                                                                         | 0.3(4)                                                                          | 0.3(6)                                                                          |

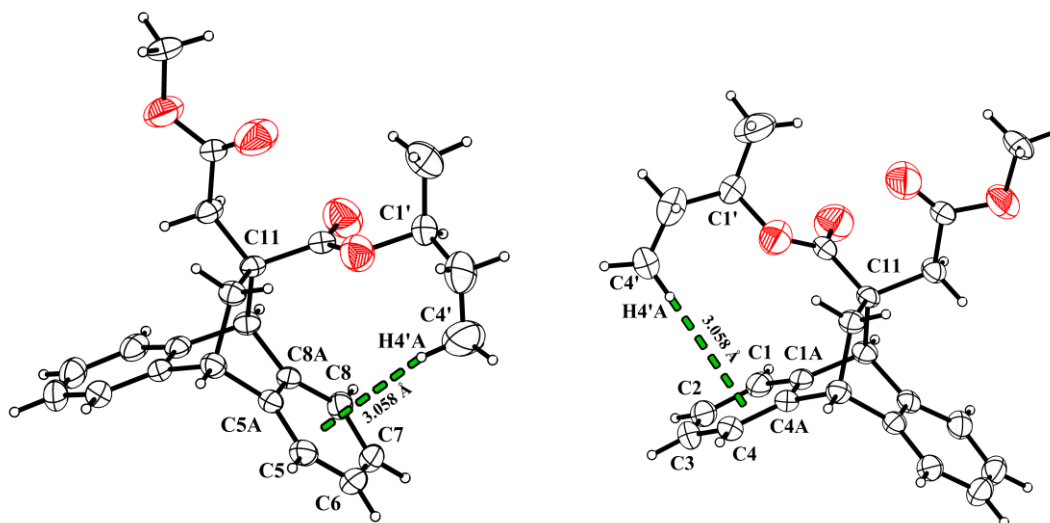

**Figure S56** C – H ... $\pi$  interaction in **11** and **14**

The C – H ... $\pi$  interaction parameters

| Compound  | H-bond            | D-H/Å   | D...A/Å  | H...A/Å   | D-H...A/° |
|-----------|-------------------|---------|----------|-----------|-----------|
| <b>11</b> | C4'-H4'A... $\pi$ | 0.96(7) | 3.847(6) | 3.0577(1) | 140.5(4)  |
| <b>14</b> | C4'-H4'A... $\pi$ | 0.96(6) | 3.844(6) | 3.0576(1) | 140.1(3)  |

[1] Dolomanov, O.V., Bourhis, L.J., Gildea, R.J., Howard, J.A.K. & Puschmann, H. (2009), *J. Appl. Cryst.* 42, 339-341.

[2] Bourhis, L.J., Dolomanov, O.V., Gildea, R.J., Howard, J.A.K., Puschmann, H. (2015). *Acta Cryst.* A71, 59-75.

[3] Sheldrick, G.M. (2015). *Acta Cryst.* C71, 3-8.
